# Supplementary material
Source: Research Square preprint supplement (doi:10.21203/rs.3.rs-9548570/v1)
Supplement: Supplementary file 1 [file 2278ddc07a3b1a3fd404e84d.xlsx]

## Sheet: Sheet1
name	group	Heart weight (mg)	Ala	Arg	Asn	Asp	Cit	Gln	Glu	Gly	His	Ile	Lys	Met	Orn	Phe	Pro	Ser	Thr	Trp	Tyr	Val	xLeu	Ac-Orn	ADMA	alpha-AAA	c4-OH-Pro	Carnosine	Creatinine	DOPA	Dopamine	Histamine	Kynurenine	Met-SO	Nitro-Tyr	PEA	Putrescine	Sarcosine	SDMA	Serotonin	Spermidine	Spermine	t4-OH-Pro	Taurine
heart FKO-1	heart FKO	17.3	873	53.9	95	570	36	1442	1152	303	52.2	31.1	223	61.8	15.3	27.4	77.7	446	249	14.2	36.9	86.6	101	NA	0.289	6.53	NA	3.22	28.2	NA	0.121	4.81	0.297	2.26	NA	0.196	17	0.869	0.054	NA	18.3	1.08	6.07	6020
heart FKO-2	heart FKO	15.5	560	47.7	70.9	933	25.4	1140	930	328	35.4	37.8	118	20.9	9.86	31	45.7	188	119	14.9	21.4	73.6	108	NA	0.373	1.43	NA	5.2	22.9	NA	0.147	2.92	0.324	0.66	0.224	0.175	5.99	NA	0.101	3.06	14.8	1.59	6.62	5549
heart FKO-3	heart FKO	17.4	852	49.9	104	736	31.8	1515	1198	271	47.5	30.3	148	70.9	8.62	31.9	88.7	391	260	14.4	46.5	83.9	91.3	NA	0.25	2.56	NA	4.16	37.3	NA	0.12	6.96	0.164	2.33	NA	NA	5.5	1.15	0.052	1.31	18.4	1.5	3.57	6810
heart FKO-4	heart FKO	16.1	644	60	88.6	1003	34	1459	1367	343	42.3	34.6	122	29.5	10.5	34.4	56.9	273	148	15.6	25	77.1	95.4	NA	0.407	1.85	NA	2.55	35.5	NA	0.136	6.37	0.34	0.416	NA	0.069	5.34	0.734	0.1	1.27	27.9	11.6	7.32	6926
heart FKO-5	heart FKO	17.4	1026	64.5	122	710	52.7	1609	1326	412	55.5	33	199	88.1	18.4	35.9	126	529	337	15.1	52.1	105	115	NA	0.39	5.92	NA	8.21	20.9	NA	0.156	5.42	0.36	3.25	NA	0.137	13.8	1.21	0.085	1.76	21.1	1.04	10.5	5393
heart FKO-6	heart FKO	15.4	925	51.1	109	508	38.2	1420	1139	350	46.6	26.3	218	52.8	15.8	27.4	73.2	446	202	14.5	36.7	68.9	97.8	NA	0.308	6.07	NA	3.97	24.7	NA	0.129	5.05	0.262	2.02	NA	0.128	17.8	NA	0.065	3.53	21.6	1.47	6.03	6365
heart FWT-7	heart FWT	21	1401	78.5	97	1355	107	3159	3302	279	95	38.8	274	44.7	9.6	36.7	51.2	244	144	24	48.8	70.6	114	NA	1.08	3.19	NA	3.85	97.8	NA	0.142	4.74	0.242	1.44	0.203	NA	1.73	NA	0.166	1.83	8.14	1.98	11	23757
heart FWT-8	heart FWT	16.2	845	40.6	57.7	445	57.5	1697	1454	154	66.8	25.2	121	18.8	6.44	16.4	21.2	157	103	8.09	15.5	41.2	68.1	NA	0.52	1.47	NA	2.11	43.7	NA	0.109	3.17	0.191	0.526	NA	0.072	0.987	NA	0.084	1.32	3.88	2.56	6.81	5997
heart FWT-9	heart FWT	15.2	578	53.9	48	269	52.8	1714	1101	191	71.7	16.2	155	32.4	9.64	22	28.7	163	89.1	9.8	24.4	39.6	56.1	NA	0.507	2.15	NA	2.06	45.4	NA	0.119	2.89	0.193	1.31	NA	0.181	2.14	NA	0.086	2.07	8.73	1.72	6.76	5500
heart FWT-10	heart FWT	14.3	698	46	45.9	844	51.2	1490	1293	167	72.3	24.7	157	31.1	4.98	21.1	28.8	123	124	10.9	27.7	46.1	56	NA	0.428	2.13	NA	3.78	57.5	NA	0.122	2.61	0.244	1.08	0.208	0.106	0.885	NA	0.065	0.663	2.86	0.362	5.54	5791
heart FWT-11	heart FWT	15	956	81.7	82.1	610	79.5	2044	1075	190	78.8	17.3	207	40.7	12.9	23.1	43.4	242	143	17.5	33.7	45.4	71.9	NA	0.573	2.1	NA	3.62	67.7	NA	0.122	4.14	0.234	1.21	NA	0.162	1.92	NA	0.092	1.02	13	2.49	7.51	6175
heart FWT-12	heart FWT	14.2	817	41.8	40.9	493	39.7	1415	983	274	54	21.4	119	31.7	9.86	25.6	37.8	81.6	96.9	13	18.5	47.6	71.1	NA	0.382	1.67	NA	3.59	37.2	NA	0.186	3.43	0.204	1.12	NA	NA	1.84	0.947	0.061	2.01	9.57	1.98	4.49	5786
