# Supplementary material
Source: Research Square preprint supplement (doi:10.21203/rs.3.rs-9548570/v1)
Supplement: Supplementary file 2 [file 8f18dbbacd721bfdc31512ea.xlsx]

## Sheet: Sheet1
	baseMean	log2FoldChange	lfcSE	stat	pvalue	padj	symbol
ENSMUSG00000026150	952.485	-5.84333	0.168807	-34.6154	1.48273e-262	2.96547e-258	Mff
ENSMUSG00000030399	8496.2	-2.15869	0.0967054	-22.3223	2.24338e-110	2.24338e-106	Ckm
ENSMUSG00000028369	975.502	2.83222	0.127468	22.2191	2.24528e-109	1.49686e-105	Svep1
ENSMUSG00000046480	407.953	-4.99439	0.232399	-21.4905	1.90858e-102	9.54292e-99	Scn4b
ENSMUSG00000040249	5434.96	1.45584	0.0739025	19.6995	2.17821e-86	8.71286e-83	Lrp1
ENSMUSG00000069516	2211.5	2.31245	0.117653	19.6549	5.25433e-86	1.75144e-82	Lyz2
ENSMUSG00000078486	4537.78	-1.49839	0.0795343	-18.8396	3.57991e-79	1.02283e-75	Perm1
ENSMUSG00000025980	3817.42	-1.49593	0.0796197	-18.7885	9.38326e-79	2.34581e-75	Hspd1
ENSMUSG00000042254	2612.81	3.67618	0.198739	18.4975	2.16238e-76	4.80528e-73	Cilp
ENSMUSG00000007888	538.409	5.89181	0.319454	18.4433	5.89732e-76	1.17946e-72	Crlf1
ENSMUSG00000025221	2034.52	-3.03211	0.168051	-18.0428	8.99174e-73	1.63486e-69	Kcnip2
ENSMUSG00000002020	1939	3.94498	0.221124	17.8406	3.42169e-71	5.70281e-68	Ltbp2
ENSMUSG00000039137	460.806	-2.74226	0.156426	-17.5307	8.35127e-69	1.28481e-65	Whrn
ENSMUSG00000118667	715.864	2.27631	0.130426	17.4528	3.27529e-68	4.67898e-65	Ahnak2
ENSMUSG00000027996	536.999	2.87282	0.165817	17.3252	3.03425e-67	4.04567e-64	Sfrp2
ENSMUSG00000029816	234.028	3.28412	0.193041	17.0125	6.6319e-65	8.28987e-62	Gpnmb
ENSMUSG00000023992	356.232	3.68209	0.216584	17.0007	8.11087e-65	9.5422e-62	Trem2
ENSMUSG00000030116	2473.92	3.02551	0.180027	16.8059	2.20981e-63	2.45534e-60	Mfap5
ENSMUSG00000027750	5954.57	3.45123	0.206635	16.7021	1.26541e-62	1.33201e-59	Postn
ENSMUSG00000018566	5469.07	-1.62533	0.0978159	-16.6162	5.32194e-62	5.32194e-59	Slc2a4
ENSMUSG00000036545	1405.64	1.99644	0.121737	16.3996	1.92474e-60	1.83308e-57	Adamts2
ENSMUSG00000019278	2222.29	2.25896	0.13851	16.309	8.51316e-60	7.73924e-57	Dpep1
ENSMUSG00000032925	889.595	3.19917	0.196737	16.2612	1.86159e-59	1.61877e-56	Itgbl1
ENSMUSG00000027809	5443.68	-1.59387	0.098934	-16.1105	2.15346e-58	1.79455e-55	Etfdh
ENSMUSG00000038239	6549.12	-2.48625	0.155008	-16.0395	6.77215e-58	5.41772e-55	Hrc
ENSMUSG00000020644	344.265	2.54688	0.159238	15.9941	1.40367e-57	1.07975e-54	Id2
ENSMUSG00000024803	23103.7	2.49014	0.155822	15.9807	1.74183e-57	1.29025e-54	Ankrd1
ENSMUSG00000019864	865.672	-1.809	0.114004	-15.8679	1.05797e-56	7.55691e-54	Rtn4ip1
ENSMUSG00000050335	1455.31	3.23148	0.206718	15.6323	4.38704e-55	3.02555e-52	Lgals3
ENSMUSG00000029467	148001	-1.88398	0.12237	-15.3958	1.74529e-53	1.16352e-50	Atp2a2
ENSMUSG00000018574	4163.26	-1.70735	0.111792	-15.2726	1.16443e-52	7.51248e-50	Acadvl
ENSMUSG00000038642	1346.28	2.78805	0.183361	15.2053	3.26132e-52	2.03833e-49	Ctss
ENSMUSG00000036896	1854.9	1.90886	0.126687	15.0676	2.64646e-51	1.60391e-48	C1qc
ENSMUSG00000001334	4308.27	-1.69339	0.112465	-15.057	3.10357e-51	1.82563e-48	Fndc5
ENSMUSG00000002781	1552.57	-1.64742	0.109878	-14.9932	8.13654e-51	4.64945e-48	Tmem143
ENSMUSG00000018845	1402.84	-1.57156	0.104966	-14.9721	1.11801e-50	6.21119e-48	Unc45b
ENSMUSG00000024087	506.332	2.76334	0.185432	14.9022	3.18968e-50	1.72415e-47	Cyp1b1
ENSMUSG00000030579	483.671	2.28481	0.154039	14.8326	9.01354e-50	4.74397e-47	Tyrobp
ENSMUSG00000040659	3403.53	2.73787	0.186016	14.7185	4.90747e-49	2.51665e-46	Efhd2
ENSMUSG00000073643	285.082	2.64604	0.179933	14.7057	5.92768e-49	2.96384e-46	Wdfy1
ENSMUSG00000043811	113.963	-4.47655	0.305449	-14.6556	1.24006e-48	6.04906e-46	Rtn4r
ENSMUSG00000030747	5363.46	-1.77709	0.121811	-14.589	3.30007e-48	1.57146e-45	Dgat2
ENSMUSG00000046805	810.601	2.86493	0.196435	14.5846	3.51921e-48	1.63684e-45	Mpeg1
ENSMUSG00000000753	1707.43	1.48747	0.102006	14.5821	3.64921e-48	1.65873e-45	Serpinf1
ENSMUSG00000031530	175.401	3.41903	0.235989	14.4881	1.44135e-47	6.40601e-45	Dusp4
ENSMUSG00000001642	1615.74	-1.39893	0.0966178	-14.479	1.64394e-47	7.14757e-45	Akr1b1
ENSMUSG00000002500	1614.86	-3.00017	0.20824	-14.4072	4.65975e-47	1.98287e-44	Rpl3l
ENSMUSG00000029810	1496.5	1.55276	0.1078	14.4042	4.87222e-47	2.03009e-44	Tmem176b
ENSMUSG00000074766	194.537	3.33075	0.231268	14.4021	5.01876e-47	2.04847e-44	Ism1
ENSMUSG00000012017	721.384	1.64129	0.114816	14.2949	2.35574e-46	9.37152e-44	Scarf2
ENSMUSG00000024011	2773.96	2.10215	0.147066	14.2939	2.38974e-46	9.37152e-44	Pi16
ENSMUSG00000004748	1406.72	-1.95899	0.137346	-14.2632	3.71063e-46	1.42716e-43	Mtfp1
ENSMUSG00000026822	216.032	4.03016	0.283535	14.214	7.50169e-46	2.83083e-43	Lcn2
ENSMUSG00000001027	241.997	-3.06989	0.218521	-14.0485	7.87337e-45	2.91606e-42	Scn4a
ENSMUSG00000053166	326.381	3.73155	0.265804	14.0387	9.0299e-45	3.2836e-42	Cdh22
ENSMUSG00000005087	541.35	1.86765	0.133329	14.0078	1.39654e-44	4.98765e-42	Cd44
ENSMUSG00000027227	2738.3	-1.47025	0.105597	-13.9232	4.58019e-44	1.60709e-41	Sord
ENSMUSG00000022442	806.453	-2.38572	0.172165	-13.8572	1.15116e-43	3.96953e-41	Ttll1
ENSMUSG00000030357	4659.39	-2.00615	0.145817	-13.758	4.55834e-43	1.5452e-40	Fkbp4
ENSMUSG00000025968	4165.53	-1.36907	0.0999593	-13.6963	1.06825e-42	3.56084e-40	Ndufs1
ENSMUSG00000026042	1915.01	2.41336	0.176238	13.6938	1.10611e-42	3.62659e-40	Col5a2
ENSMUSG00000021253	754.88	1.56235	0.11434	13.6641	1.66343e-42	5.36591e-40	Tgfb3
ENSMUSG00000031548	1449.56	2.51864	0.18483	13.6268	2.77612e-42	8.81306e-40	Sfrp1
ENSMUSG00000086841	408.567	2.92854	0.215156	13.6112	3.43427e-42	1.07321e-39	2410006H16Rik
ENSMUSG00000028111	295.867	2.29056	0.168347	13.6061	3.68208e-42	1.13295e-39	Ctsk
ENSMUSG00000010064	994.716	-2.59527	0.19149	-13.553	7.60448e-42	2.30439e-39	Slc38a3
ENSMUSG00000058297	716.703	1.98388	0.146548	13.5374	9.40551e-42	2.80761e-39	Spock2
ENSMUSG00000020681	2372.05	2.50037	0.185948	13.4466	3.22224e-41	9.47717e-39	Ace
ENSMUSG00000024529	1420.24	5.40312	0.401905	13.4438	3.34854e-41	9.70592e-39	Lox
ENSMUSG00000025283	580.761	1.63724	0.122498	13.3655	9.62344e-41	2.74956e-38	Sat1
ENSMUSG00000069792	374.579	3.06059	0.229157	13.3559	1.09468e-40	3.08361e-38	Wfdc17
ENSMUSG00000134258	266.505	2.28731	0.171347	13.349	1.20082e-40	3.33561e-38	NA
ENSMUSG00000026526	5958.79	-1.20212	0.0904732	-13.287	2.75395e-40	7.54506e-38	Fh1
ENSMUSG00000002985	19099.9	2.0276	0.152726	13.2761	3.18502e-40	8.60817e-38	Apoe
ENSMUSG00000022748	497.862	-2.00961	0.153221	-13.1158	2.67347e-39	7.12926e-37	Cmss1
ENSMUSG00000029223	1038.52	3.1383	0.239872	13.0832	4.10561e-39	1.08042e-36	Uchl1
ENSMUSG00000044951	1463.2	-2.89873	0.221614	-13.0801	4.27762e-39	1.11107e-36	Mylk4
ENSMUSG00000027656	2979.82	5.2406	0.401465	13.0537	6.05393e-39	1.55229e-36	Ccn5
ENSMUSG00000039914	3902.16	-1.33984	0.102933	-13.0166	9.84197e-39	2.49164e-36	Coq10a
ENSMUSG00000030218	14222.2	2.17885	0.167517	13.0068	1.11985e-38	2.79962e-36	Mgp
ENSMUSG00000038506	904.721	-1.6367	0.126036	-12.9859	1.47034e-38	3.63046e-36	Dcun1d2
ENSMUSG00000038508	197.186	2.47435	0.192746	12.8373	1.01288e-37	2.47043e-35	Gdf15
ENSMUSG00000036887	2383.07	1.71939	0.134037	12.8278	1.14627e-37	2.7621e-35	C1qa
ENSMUSG00000024120	1990.39	-1.65221	0.128887	-12.819	1.28268e-37	3.05401e-35	Lrpprc
ENSMUSG00000026495	1020.99	-1.56856	0.122577	-12.7965	1.7142e-37	4.03342e-35	Efcab2
ENSMUSG00000039542	198.804	2.2107	0.172841	12.7904	1.85538e-37	4.31483e-35	Ncam1
ENSMUSG00000090150	1006.35	-1.89846	0.148573	-12.778	2.17636e-37	5.00312e-35	Acad11
ENSMUSG00000054196	164.454	5.9047	0.462156	12.7764	2.22051e-37	5.04662e-35	Cthrc1
ENSMUSG00000021876	1606.86	1.5776	0.123616	12.7621	2.6705e-37	6.00113e-35	Rnase4
ENSMUSG00000006205	1912.73	-1.42457	0.111723	-12.7509	3.08308e-37	6.85128e-35	Htra1
ENSMUSG00000073418	1649.49	2.30584	0.180885	12.7475	3.21882e-37	7.07433e-35	C4b
ENSMUSG00000029752	196.918	2.61097	0.20538	12.7129	5.01543e-37	1.09031e-34	Asns
ENSMUSG00000059447	17584.9	-1.77763	0.139855	-12.7105	5.1714e-37	1.11213e-34	Hadhb
ENSMUSG00000029591	273.639	-2.26771	0.178476	-12.706	5.47985e-37	1.16592e-34	Ung
ENSMUSG00000112327	429.37	-3.04147	0.241622	-12.5877	2.46692e-36	5.19352e-34	NA
ENSMUSG00000060376	578.324	-1.49487	0.118876	-12.5751	2.89487e-36	6.03098e-34	Bckdha
ENSMUSG00000027765	191.492	-2.75168	0.21923	-12.5516	3.89782e-36	8.03673e-34	P2ry1
ENSMUSG00000032715	203.082	2.53072	0.201685	12.5479	4.08397e-36	8.33464e-34	Trib3
ENSMUSG00000004789	7539.45	-1.07243	0.0858625	-12.49	8.46093e-36	1.69219e-33	Dlst
ENSMUSG00000018920	397.038	1.88508	0.151331	12.4567	1.28622e-35	2.52199e-33	Cxcl16
ENSMUSG00000024677	217.25	2.41331	0.19373	12.457	1.28056e-35	2.52199e-33	Ms4a6b
ENSMUSG00000036905	2155.08	1.79795	0.144915	12.4069	2.39754e-35	4.61065e-33	C1qb
ENSMUSG00000023224	4786.56	1.54259	0.124376	12.4026	2.52904e-35	4.81721e-33	Serping1
ENSMUSG00000031167	1589.3	2.38984	0.193173	12.3715	3.7269e-35	7.03188e-33	Rbm3
ENSMUSG00000028047	265.466	1.78932	0.144692	12.3664	3.97026e-35	7.42105e-33	Thbs3
ENSMUSG00000062981	3658.06	-1.24932	0.101392	-12.3216	6.92875e-35	1.2831e-32	Mrpl42
ENSMUSG00000021242	2314.08	1.26994	0.10311	12.3163	7.39905e-35	1.35762e-32	Npc2
ENSMUSG00000050359	413.445	7.10745	0.581326	12.2263	2.25034e-34	4.09152e-32	Sprr1a
ENSMUSG00000024978	2166.26	-1.55956	0.127573	-12.2248	2.29082e-34	4.1276e-32	Gpam
ENSMUSG00000000399	3555.74	-1.05712	0.0865516	-12.2138	2.62425e-34	4.68617e-32	Ndufa9
ENSMUSG00000046402	1330.62	2.52173	0.207859	12.1319	7.1543e-34	1.26625e-31	Rbp1
ENSMUSG00000058715	465.048	2.12552	0.175672	12.0994	1.064e-33	1.86666e-31	Fcer1g
ENSMUSG00000024726	589.616	-1.3867	0.114719	-12.0878	1.22563e-33	2.13153e-31	Carnmt1
ENSMUSG00000112023	184.033	3.46363	0.289559	11.9617	5.63655e-33	9.71819e-31	Lilrb4b
ENSMUSG00000037622	1678.23	-1.16716	0.0975819	-11.9608	5.70032e-33	9.74414e-31	Wdtc1
ENSMUSG00000025473	170.08	4.06343	0.339799	11.9583	5.87358e-33	9.95523e-31	Adam8
ENSMUSG00000034993	1307.39	1.34705	0.112681	11.9546	6.14566e-33	1.03288e-30	Vat1
ENSMUSG00000040086	1521.21	-1.83524	0.153902	-11.9247	8.80234e-33	1.46706e-30	Tnni3k
ENSMUSG00000029158	1269.23	-1.84637	0.155504	-11.8734	1.62653e-32	2.68848e-30	Yipf7
ENSMUSG00000027204	2438.62	2.20836	0.186125	11.8649	1.80027e-32	2.95127e-30	Fbn1
ENSMUSG00000006301	2755.29	1.47391	0.124316	11.8562	1.99955e-32	3.2513e-30	Tmbim1
ENSMUSG00000024640	193.597	2.16772	0.182994	11.8459	2.26035e-32	3.64572e-30	Psat1
ENSMUSG00000030884	7827.8	-1.13985	0.0964226	-11.8214	3.0249e-32	4.83984e-30	Uqcrc2
ENSMUSG00000059498	643.651	2.08898	0.177054	11.7985	3.97139e-32	6.30379e-30	Fcgr3
ENSMUSG00000026837	1655.7	1.51569	0.128961	11.7531	6.80568e-32	1.07176e-29	Col5a1
ENSMUSG00000030717	319.528	2.28698	0.194605	11.7519	6.90371e-32	1.07871e-29	Nupr1
ENSMUSG00000021091	5591.09	5.87921	0.500386	11.7493	7.11714e-32	1.10343e-29	Serpina3n
ENSMUSG00000031146	895.548	1.37223	0.117102	11.7183	1.02735e-31	1.58054e-29	Plp2
ENSMUSG00000023349	89.0847	3.04898	0.260459	11.7062	1.18519e-31	1.80945e-29	Clec4n
ENSMUSG00000028690	738.103	-1.48201	0.126609	-11.7054	1.19636e-31	1.81267e-29	Mmachc
ENSMUSG00000042436	2139.38	2.05496	0.17651	11.6422	2.51576e-31	3.7831e-29	Mfap4
ENSMUSG00000056228	414.836	-1.59903	0.13743	-11.6352	2.72837e-31	4.07219e-29	Cars2
ENSMUSG00000056025	79.2592	4.06934	0.350122	11.6226	3.16286e-31	4.68571e-29	Clca3a1
ENSMUSG00000040752	199337	-1.40914	0.121292	-11.6178	3.34758e-31	4.92291e-29	Myh6
ENSMUSG00000096956	284.549	1.70129	0.146715	11.5959	4.32481e-31	6.31359e-29	Snhg18
ENSMUSG00000026656	412.211	2.1017	0.181266	11.5946	4.38873e-31	6.36048e-29	Fcgr2b
ENSMUSG00000040690	487.126	2.04945	0.177645	11.5367	8.61191e-31	1.23912e-28	Col16a1
ENSMUSG00000000340	562.876	-1.56038	0.135361	-11.5275	9.58448e-31	1.36921e-28	Dbt
ENSMUSG00000038403	3784.44	-1.64178	0.14251	-11.5205	1.0403e-30	1.47561e-28	Hjv
ENSMUSG00000032334	2275.11	1.54787	0.134396	11.5173	1.0796e-30	1.52056e-28	Loxl1
ENSMUSG00000022440	466.768	1.8695	0.162343	11.5158	1.09894e-30	1.53698e-28	C1qtnf6
ENSMUSG00000031253	338.342	2.29924	0.199871	11.5036	1.26454e-30	1.75631e-28	Srpx2
ENSMUSG00000002032	119.557	-2.21819	0.192911	-11.4985	1.34204e-30	1.85109e-28	Tmem25
ENSMUSG00000038147	146.065	2.56669	0.223971	11.4599	2.09669e-30	2.87218e-28	Cd84
ENSMUSG00000028383	2477.67	-1.44064	0.125787	-11.453	2.27184e-30	3.09094e-28	Hsdl2
ENSMUSG00000029843	69.6579	4.23211	0.370106	11.4348	2.80045e-30	3.78439e-28	Slc13a4
ENSMUSG00000026853	7148.68	-1.46747	0.128808	-11.3927	4.54875e-30	6.10571e-28	Crat
ENSMUSG00000023913	297.458	2.14055	0.187996	11.3862	4.90119e-30	6.53491e-28	Pla2g7
ENSMUSG00000026786	159.695	1.96388	0.172507	11.3843	5.00609e-30	6.63058e-28	Apbb1ip
ENSMUSG00000031375	16760.6	1.82671	0.160533	11.379	5.3179e-30	6.99723e-28	Bgn
ENSMUSG00000018774	406.837	1.882	0.165466	11.3739	5.63922e-30	7.37153e-28	Cd68
ENSMUSG00000029061	410.323	1.59305	0.140166	11.3655	6.20982e-30	8.04426e-28	Mmp23
ENSMUSG00000043557	235.978	-2.08272	0.183255	-11.3652	6.2343e-30	8.04426e-28	Mdga1
ENSMUSG00000064080	4847.97	1.89891	0.167585	11.331	9.21152e-30	1.18096e-27	Fbln2
ENSMUSG00000030144	105.069	5.24049	0.463252	11.3124	1.13936e-29	1.45141e-27	Clec4d
ENSMUSG00000000693	481.094	3.03942	0.26923	11.2893	1.48161e-29	1.87546e-27	Loxl3
ENSMUSG00000060798	334.615	-1.66138	0.14729	-11.2797	1.65347e-29	2.07984e-27	Intu
ENSMUSG00000005667	272.816	3.03278	0.26949	11.2538	2.2192e-29	2.774e-27	Mthfd2
ENSMUSG00000046603	582.816	-1.2485	0.111044	-11.2433	2.49846e-29	3.10368e-27	Tcaim
ENSMUSG00000021185	682.709	-1.88947	0.16815	-11.2369	2.68755e-29	3.31796e-27	Dglucy
ENSMUSG00000006818	4873.91	-1.14492	0.102014	-11.2231	3.1402e-29	3.85301e-27	Sod2
ENSMUSG00000024219	1285.01	-1.78007	0.158867	-11.2048	3.86376e-29	4.7119e-27	Anks1
ENSMUSG00000024132	2884.88	-1.44673	0.129342	-11.1854	4.80994e-29	5.83023e-27	Eci1
ENSMUSG00000027188	367.443	2.27215	0.20335	11.1736	5.49138e-29	6.61612e-27	Pamr1
ENSMUSG00000051279	157.624	4.73597	0.425102	11.1408	7.94162e-29	9.51092e-27	Gdf6
ENSMUSG00000031790	2232.43	-1.92346	0.172822	-11.1297	8.99235e-29	1.07052e-26	Mmp15
ENSMUSG00000023828	56.5372	-4.30871	0.387614	-11.116	1.04899e-28	1.24141e-26	Slc22a3
ENSMUSG00000025733	704.418	-1.33195	0.119859	-11.1127	1.08857e-28	1.28067e-26	Rhot2
ENSMUSG00000022186	10562.2	-1.47163	0.132439	-11.1118	1.09944e-28	1.28589e-26	Oxct1
ENSMUSG00000021577	16704.3	-1.19233	0.107317	-11.1104	1.11709e-28	1.29894e-26	Sdha
ENSMUSG00000040950	119.614	-2.73444	0.246208	-11.1062	1.17028e-28	1.35293e-26	Mgl2
ENSMUSG00000034810	676.288	1.50048	0.135244	11.0946	1.33219e-28	1.53125e-26	Scn7a
ENSMUSG00000021311	1440.97	-1.85855	0.167837	-11.0735	1.68606e-28	1.92692e-26	Mtr
ENSMUSG00000005882	1960.66	-1.36071	0.123195	-11.0452	2.3134e-28	2.62887e-26	Uqcc1
ENSMUSG00000018796	8559.38	-1.68405	0.152498	-11.0431	2.36733e-28	2.67495e-26	Acsl1
ENSMUSG00000029392	2190.98	-1.08635	0.0985696	-11.0212	3.02115e-28	3.39455e-26	Rilpl1
ENSMUSG00000023367	685.973	1.4694	0.133429	11.0126	3.32358e-28	3.71349e-26	Tmem176a
ENSMUSG00000097357	76.007	-3.07388	0.279259	-11.0072	3.52611e-28	3.9179e-26	Gm16793
ENSMUSG00000021367	227.331	3.1023	0.282017	11.0004	3.80398e-28	4.2033e-26	Edn1
ENSMUSG00000033365	1113.73	-1.26767	0.115264	-10.998	3.90664e-28	4.29301e-26	Ipo13
ENSMUSG00000063684	208.836	-1.99343	0.181704	-10.9708	5.28323e-28	5.77402e-26	NA
ENSMUSG00000029019	16234.2	2.96167	0.270099	10.9652	5.6202e-28	6.10892e-26	Nppb
ENSMUSG00000022594	3539.52	-1.19905	0.109442	-10.956	6.21601e-28	6.72001e-26	Lynx1
ENSMUSG00000028364	141.907	3.12382	0.285473	10.9426	7.20814e-28	7.75069e-26	Tnc
ENSMUSG00000023921	1120.2	-1.28388	0.11735	-10.9407	7.36569e-28	7.87774e-26	Mmut
ENSMUSG00000064225	890.189	-1.48895	0.136262	-10.9271	8.55216e-28	9.09804e-26	Paqr9
ENSMUSG00000021646	659.908	-1.28583	0.117733	-10.9216	9.08978e-28	9.61881e-26	Mccc2
ENSMUSG00000020988	611.593	-1.21662	0.111557	-10.9059	1.08047e-27	1.13733e-25	L2hgdh
ENSMUSG00000066705	1977.41	1.92612	0.176674	10.9021	1.12578e-27	1.17883e-25	Fxyd6
ENSMUSG00000022546	379.126	-1.78693	0.164324	-10.8744	1.52673e-27	1.59035e-25	Gpt
ENSMUSG00000024679	202.283	2.92913	0.269381	10.8736	1.5407e-27	1.59658e-25	Ms4a6d
ENSMUSG00000027367	2500.69	-1.00862	0.0928153	-10.867	1.65552e-27	1.70672e-25	Stard7
ENSMUSG00000020427	1630.43	2.02802	0.186654	10.8651	1.68969e-27	1.73301e-25	Igfbp3
ENSMUSG00000020456	31183.5	-1.22204	0.112528	-10.8599	1.7896e-27	1.82612e-25	Ogdh
ENSMUSG00000000168	4941.27	-1.02811	0.0947079	-10.8556	1.87664e-27	1.90521e-25	Dlat
ENSMUSG00000101941	68.7228	-6.22243	0.57332	-10.8533	1.92322e-27	1.94265e-25	Gm28979
ENSMUSG00000068335	240.739	2.68589	0.247502	10.852	1.9514e-27	1.9612e-25	Dok1
ENSMUSG00000035458	67510.8	-1.10689	0.102223	-10.8282	2.53e-27	2.53e-25	Tnni3
ENSMUSG00000037742	34690.8	1.53814	0.142169	10.8191	2.7953e-27	2.78139e-25	Eef1a1
ENSMUSG00000026365	7441.03	1.74438	0.161294	10.8149	2.92627e-27	2.8973e-25	Cfh
ENSMUSG00000058818	217.934	2.29824	0.213054	10.7872	3.95802e-27	3.89952e-25	Pirb
ENSMUSG00000032177	877.301	-1.64887	0.152878	-10.7855	4.02855e-27	3.94956e-25	Pde4a
ENSMUSG00000021134	1619.74	1.05481	0.097913	10.7729	4.62167e-27	4.50895e-25	Srsf5
ENSMUSG00000048458	418.601	-2.41169	0.223941	-10.7693	4.80387e-27	4.66395e-25	Inka2
ENSMUSG00000041650	897.056	-1.32299	0.12288	-10.7665	4.95467e-27	4.78712e-25	Pcca
ENSMUSG00000037989	1031.32	-1.68946	0.157063	-10.7566	5.51967e-27	5.28198e-25	Wnk2
ENSMUSG00000018882	874.675	-1.17265	0.109046	-10.7538	5.68956e-27	5.41862e-25	Mrpl45
ENSMUSG00000073838	2949.56	-1.28948	0.120107	-10.7361	6.88854e-27	6.52942e-25	Tufm
ENSMUSG00000020340	1561.17	-1.86009	0.173302	-10.7332	7.10812e-27	6.70577e-25	Cyfip2
ENSMUSG00000026697	456.495	2.01633	0.18833	10.7064	9.50204e-27	8.92211e-25	Myoc
ENSMUSG00000041482	99.4705	2.63406	0.246049	10.7054	9.59781e-27	8.96991e-25	Piezo2
ENSMUSG00000038807	1103.64	-1.20859	0.11388	-10.6128	2.59766e-26	2.41643e-24	Rap1gap2
ENSMUSG00000028607	3061.86	-2.01099	0.189698	-10.601	2.94822e-26	2.72983e-24	Cpt2
ENSMUSG00000026062	84.3598	-2.79872	0.264426	-10.5841	3.53047e-26	3.25389e-24	Slc9a2
ENSMUSG00000030246	20866.4	-1.24282	0.117577	-10.5702	4.09528e-26	3.75714e-24	Ldhb
ENSMUSG00000038855	1281.74	-1.04817	0.0991786	-10.5685	4.1691e-26	3.8074e-24	Itpkb
ENSMUSG00000031782	6550.59	-1.2544	0.118813	-10.5578	4.6759e-26	4.25082e-24	Coq9
ENSMUSG00000045776	2844.14	-2.35199	0.222938	-10.55	5.08085e-26	4.57735e-24	Lrtm1
ENSMUSG00000032786	2853.25	-1.16666	0.110672	-10.5416	5.55632e-26	4.98325e-24	Alas1
ENSMUSG00000030562	249.701	2.99152	0.284119	10.5291	6.34201e-26	5.66251e-24	Nox4
ENSMUSG00000027709	601.494	-1.92246	0.182676	-10.5239	6.70682e-26	5.9104e-24	Mccc1
ENSMUSG00000029864	1039.87	-1.68782	0.160381	-10.5238	6.7083e-26	5.9104e-24	Gstk1
ENSMUSG00000036040	1357.75	2.28713	0.218074	10.4879	9.82172e-26	8.61555e-24	Adamtsl2
ENSMUSG00000022816	5391.66	2.09247	0.199787	10.4735	1.14329e-25	9.98504e-24	Fstl1
ENSMUSG00000074578	271.737	2.45166	0.234186	10.4689	1.20053e-25	1.04394e-23	Zfas1
ENSMUSG00000031708	6034.02	-1.61609	0.154454	-10.4632	1.27428e-25	1.10327e-23	Tecr
ENSMUSG00000021557	1136.34	-1.19427	0.114199	-10.4579	1.34876e-25	1.16273e-23	Agtpbp1
ENSMUSG00000028622	1119.71	-1.06827	0.102316	-10.4409	1.61313e-25	1.38466e-23	Mrpl37
ENSMUSG00000023043	132.781	2.44977	0.23476	10.4352	1.71202e-25	1.46326e-23	Krt18
ENSMUSG00000027848	946.228	1.82174	0.17522	10.3969	2.56151e-25	2.17077e-23	Olfml3
ENSMUSG00000022090	419.546	1.78687	0.171977	10.3902	2.7479e-25	2.31891e-23	Pdlim2
ENSMUSG00000026407	85.811	-2.52037	0.243269	-10.3604	3.75259e-25	3.15344e-23	Cacna1s
ENSMUSG00000047298	96.8	-3.48979	0.337573	-10.3379	4.74954e-25	3.97451e-23	Kcnv2
ENSMUSG00000026193	2391.32	1.8558	0.179975	10.3114	6.25566e-25	5.21305e-23	Fn1
ENSMUSG00000025745	18125	-1.64779	0.159938	-10.3027	6.85227e-25	5.68653e-23	Hadha
ENSMUSG00000027004	588.941	2.43474	0.236916	10.2768	8.96426e-25	7.40848e-23	Frzb
ENSMUSG00000097195	121.328	2.53777	0.24713	10.269	9.72382e-25	8.00315e-23	Snhg5
ENSMUSG00000060036	7438.85	1.53698	0.149753	10.2635	1.02931e-24	8.43695e-23	Rpl3
ENSMUSG00000044811	110.979	2.9198	0.284908	10.2482	1.20546e-24	9.84048e-23	Cd300c2
ENSMUSG00000048486	2978.08	-1.56439	0.152672	-10.2467	1.22442e-24	9.95465e-23	Fitm2
ENSMUSG00000085148	385.107	2.42038	0.236263	10.2444	1.25344e-24	1.01493e-22	Mir22hg
ENSMUSG00000048371	278.043	-2.4033	0.235389	-10.2099	1.79073e-24	1.43833e-22	Pdp2
ENSMUSG00000020459	427.892	-1.15662	0.113379	-10.2014	1.95529e-24	1.56423e-22	Mtif2
ENSMUSG00000029070	1105.89	1.33909	0.131274	10.2007	1.96799e-24	1.56812e-22	Mxra8
ENSMUSG00000020120	263.464	1.95713	0.191965	10.1952	2.0825e-24	1.65278e-22	Plek
ENSMUSG00000006014	1069	2.50524	0.246033	10.1825	2.37336e-24	1.86878e-22	Prg4
ENSMUSG00000026489	8183.73	-1.36314	0.134037	-10.1699	2.70304e-24	2.12003e-22	Coq8a
ENSMUSG00000029657	692.521	-1.87954	0.184917	-10.1642	2.8641e-24	2.23758e-22	Hsph1
ENSMUSG00000050556	513.685	-1.36382	0.134337	-10.1523	3.23719e-24	2.49976e-22	Kcnb1
ENSMUSG00000030157	393.867	1.89779	0.186928	10.1525	3.22915e-24	2.49976e-22	Clec2d
ENSMUSG00000056596	296.161	3.15458	0.311097	10.1402	3.66427e-24	2.81867e-22	Trnp1
ENSMUSG00000028019	122.031	1.88507	0.186127	10.1279	4.15655e-24	3.18509e-22	Pdgfc
ENSMUSG00000060703	454.872	1.92646	0.190605	10.1071	5.13942e-24	3.92322e-22	Cd302
ENSMUSG00000028108	1378.2	1.3613	0.134737	10.1034	5.33606e-24	4.05784e-22	Ecm1
ENSMUSG00000044006	358.33	-2.0408	0.20203	-10.1014	5.44378e-24	4.12407e-22	Cilp2
ENSMUSG00000024501	1462.5	1.26477	0.125752	10.0576	8.50338e-24	6.39352e-22	Dpysl3
ENSMUSG00000024672	148.869	3.1023	0.308477	10.0569	8.56942e-24	6.41904e-22	Ms4a7
ENSMUSG00000024442	2141.02	-1.34328	0.133643	-10.0512	9.07313e-24	6.77099e-22	Dele1
ENSMUSG00000055809	74.6695	-2.39474	0.238872	-10.0252	1.18155e-23	8.78479e-22	Dnaaf3
ENSMUSG00000062210	1010.39	-1.19841	0.119593	-10.0207	1.23562e-23	9.15273e-22	Tnfaip8
ENSMUSG00000015843	920.763	-1.4897	0.149094	-9.99169	1.65724e-23	1.22306e-21	Rxrg
ENSMUSG00000000628	3513.61	-1.42886	0.143027	-9.99017	1.68301e-23	1.2375e-21	Hk2
ENSMUSG00000004069	2140.86	-1.01914	0.102078	-9.98398	1.79137e-23	1.31236e-21	Dnaja3
ENSMUSG00000062991	67.7903	3.48927	0.350495	9.95525	2.39232e-23	1.74622e-21	Nrg1
ENSMUSG00000021701	657.761	1.39758	0.140398	9.95439	2.41291e-23	1.75484e-21	Plk2
ENSMUSG00000033065	12921.1	-1.31047	0.131912	-9.93449	2.94692e-23	2.12774e-21	Pfkm
ENSMUSG00000061838	2124.11	-1.23545	0.12455	-9.91929	3.43193e-23	2.46902e-21	Suclg2
ENSMUSG00000027774	2058.15	-1.06111	0.107027	-9.91438	3.60485e-23	2.58412e-21	Gfm1
ENSMUSG00000022098	984.26	1.00038	0.10098	9.90668	3.8937e-23	2.78122e-21	Bmp1
ENSMUSG00000026177	208.087	1.74112	0.175762	9.90616	3.91417e-23	2.78588e-21	Slc11a1
ENSMUSG00000036932	929.153	-1.07948	0.109028	-9.90098	4.12234e-23	2.92364e-21	Aifm1
ENSMUSG00000061878	163.098	2.67682	0.270635	9.89087	4.56035e-23	3.22286e-21	Sphk1
ENSMUSG00000084929	70.1497	-3.00673	0.304054	-9.8888	4.65597e-23	3.27885e-21	Foxo6os
ENSMUSG00000028973	1310.41	-1.05792	0.107141	-9.8741	5.39156e-23	3.78355e-21	Abcb8
ENSMUSG00000041736	1718.41	1.71125	0.173429	9.86712	5.78019e-23	4.04209e-21	Tspo
ENSMUSG00000022548	74.6261	2.69224	0.273441	9.84581	7.14614e-23	4.97989e-21	Apod
ENSMUSG00000022146	467.925	1.318	0.13418	9.82258	9.00135e-23	6.25094e-21	Osmr
ENSMUSG00000036256	10412.3	1.68812	0.172201	9.80317	1.09106e-22	7.52454e-21	Igfbp7
ENSMUSG00000015112	1713.04	-1.39177	0.142087	-9.7952	1.18066e-22	8.11453e-21	Slc25a13
ENSMUSG00000041193	545.245	-2.25184	0.230182	-9.78288	1.33361e-22	9.1343e-21	Pla2g5
ENSMUSG00000053898	15813	-1.70137	0.173979	-9.77921	1.38287e-22	9.4394e-21	Ech1
ENSMUSG00000041528	717.744	-1.30712	0.133849	-9.76566	1.58085e-22	1.07177e-20	Rnf123
ENSMUSG00000040428	134.385	2.11615	0.217211	9.74238	1.98838e-22	1.3435e-20	Plekha4
ENSMUSG00000037185	187.253	2.58472	0.265317	9.74203	1.99529e-22	1.34363e-20	Krt80
ENSMUSG00000042961	236.457	-1.90708	0.195874	-9.73625	2.11199e-22	1.41744e-20	Egflam
ENSMUSG00000071713	132.001	2.44072	0.25148	9.70543	2.85857e-22	1.91209e-20	Csf2rb
ENSMUSG00000049265	5056.68	-1.01227	0.104338	-9.70176	2.96333e-22	1.97555e-20	Kcnk3
ENSMUSG00000022665	2803.16	1.20181	0.123917	9.69851	3.05939e-22	2.03282e-20	Ccdc80
ENSMUSG00000024962	6226.65	-1.00553	0.103762	-9.69074	3.30128e-22	2.18628e-20	Vegfb
ENSMUSG00000024538	637.057	1.50209	0.155166	9.68052	3.64841e-22	2.40819e-20	Ppic
ENSMUSG00000021993	1052.66	-1.34527	0.139204	-9.66401	4.28757e-22	2.82077e-20	Mipep
ENSMUSG00000034593	223.286	1.91125	0.197848	9.66015	4.45194e-22	2.91931e-20	Myo5a
ENSMUSG00000026027	712.992	-1.19216	0.12342	-9.65932	4.48829e-22	2.93352e-20	Stradb
ENSMUSG00000038663	2677.61	-1.24581	0.129197	-9.64273	5.27644e-22	3.43742e-20	Fsd2
ENSMUSG00000026664	6748.81	-1.16601	0.120947	-9.64067	5.38358e-22	3.49583e-20	Phyh
ENSMUSG00000022742	539.836	-1.27443	0.1322	-9.64017	5.41003e-22	3.50164e-20	Cpox
ENSMUSG00000040740	1633.94	-1.65052	0.171458	-9.62638	6.18703e-22	3.99163e-20	Slc25a34
ENSMUSG00000022037	33546.3	1.36914	0.14243	9.61273	7.06501e-22	4.53471e-20	Clu
ENSMUSG00000116066	179.271	-2.8077	0.292086	-9.6126	7.07415e-22	4.53471e-20	NA
ENSMUSG00000070056	706.102	-1.26848	0.132115	-9.60128	7.89575e-22	5.04521e-20	Mfhas1
ENSMUSG00000063884	1121.82	-1.47252	0.153793	-9.57468	1.02169e-21	6.5076e-20	Ptcd3
ENSMUSG00000032314	7519.85	-1.05719	0.110489	-9.56828	1.08694e-21	6.90121e-20	Etfa
ENSMUSG00000029838	280.965	2.115	0.221073	9.56698	1.10073e-21	6.96667e-20	Ptn
ENSMUSG00000029545	3359.27	-1.12853	0.118045	-9.56014	1.17595e-21	7.41924e-20	Acads
ENSMUSG00000032648	17116.5	-1.44394	0.151244	-9.54711	1.33363e-21	8.38762e-20	Pygm
ENSMUSG00000030598	81.9636	2.48038	0.259821	9.5465	1.34157e-21	8.41112e-20	Fbxo17
ENSMUSG00000024659	1068.57	1.93498	0.203011	9.53143	1.55137e-21	9.69605e-20	Anxa1
ENSMUSG00000051439	371.855	1.9473	0.20448	9.52318	1.67952e-21	1.04643e-19	Cd14
ENSMUSG00000009185	135.548	3.7837	0.398114	9.50408	2.0183e-21	1.24587e-19	Ccl8
ENSMUSG00000001493	670.64	1.50447	0.158406	9.49759	2.14797e-21	1.32183e-19	Meox1
ENSMUSG00000035184	288.001	2.01849	0.212579	9.49523	2.19732e-21	1.34437e-19	Fam124a
ENSMUSG00000048612	297.634	1.39427	0.146839	9.49519	2.19805e-21	1.34437e-19	Myof
ENSMUSG00000032625	252.218	2.30773	0.243051	9.49483	2.20575e-21	1.34497e-19	Thsd7a
ENSMUSG00000053332	570.031	1.56863	0.165252	9.49235	2.25874e-21	1.36893e-19	Gas5
ENSMUSG00000040350	262.348	-2.19063	0.230853	-9.48928	2.32632e-21	1.4014e-19	Trim7
ENSMUSG00000026172	341.754	-1.27342	0.134271	-9.48396	2.44802e-21	1.47028e-19	Bcs1l
ENSMUSG00000108414	146.958	2.23514	0.236004	9.47076	2.77809e-21	1.65856e-19	NA
ENSMUSG00000038526	1010.91	-1.21367	0.128228	-9.46497	2.93636e-21	1.74783e-19	Car14
ENSMUSG00000040213	257.539	-1.48356	0.156853	-9.45828	3.13045e-21	1.85784e-19	Kyat3
ENSMUSG00000027984	6861.69	-1.30116	0.137631	-9.45397	3.26219e-21	1.93029e-19	Hadh
ENSMUSG00000020458	3088.15	1.51044	0.16029	9.42316	4.3771e-21	2.58236e-19	Rtn4
ENSMUSG00000025209	440.557	-1.06879	0.113437	-9.42185	4.432e-21	2.60706e-19	Twnk
ENSMUSG00000040747	246.492	1.76307	0.187298	9.4132	4.81259e-21	2.82263e-19	Cd53
ENSMUSG00000032396	418.071	-1.13726	0.12083	-9.41206	4.86509e-21	2.84508e-19	Dis3l
ENSMUSG00000016179	77.815	2.3215	0.247047	9.39697	5.61555e-21	3.27437e-19	Camk1g
ENSMUSG00000004035	574.08	-1.4358	0.152834	-9.39452	5.74814e-21	3.33226e-19	Gstm7
ENSMUSG00000020810	3067.34	1.45482	0.154884	9.393	5.83155e-21	3.37084e-19	Cygb
ENSMUSG00000000441	546.147	-1.08782	0.115882	-9.3873	6.15559e-21	3.54789e-19	Raf1
ENSMUSG00000002346	699.268	-1.55177	0.165688	-9.3656	7.56228e-21	4.34614e-19	Slc25a42
ENSMUSG00000027510	1629.5	-1.34257	0.143486	-9.35679	8.21964e-21	4.69694e-19	Rbm38
ENSMUSG00000029659	252.294	1.62922	0.174118	9.35703	8.20129e-21	4.69694e-19	Medag
ENSMUSG00000053062	2153.99	-1.34033	0.143263	-9.35572	8.30283e-21	4.73096e-19	Jam2
ENSMUSG00000027332	4490.95	-1.48946	0.159485	-9.33917	9.70916e-21	5.51657e-19	Ivd
ENSMUSG00000021622	17609.1	-1.32339	0.141865	-9.32849	1.07385e-20	6.08413e-19	Ckmt2
ENSMUSG00000022265	3395.22	-1.16452	0.125183	-9.3025	1.37185e-20	7.75058e-19	Ank
ENSMUSG00000060572	226.298	1.97314	0.21223	9.29716	1.44251e-20	8.12681e-19	Mfap2
ENSMUSG00000019863	325.986	-1.20629	0.129804	-9.29313	1.49814e-20	8.41654e-19	Qrsl1
ENSMUSG00000006219	3217.81	-1.3591	0.146425	-9.28189	1.66494e-20	9.32738e-19	Fblim1
ENSMUSG00000026259	57.7804	2.85077	0.307193	9.28005	1.69405e-20	9.46396e-19	Ngef
ENSMUSG00000074218	402.594	-1.70059	0.183264	-9.27946	1.70345e-20	9.48998e-19	Cox7a1
ENSMUSG00000040170	1533.82	2.37095	0.255585	9.27656	1.75043e-20	9.72462e-19	Fmo2
ENSMUSG00000096842	657.811	2.03989	0.219943	9.2746	1.78283e-20	9.87717e-19	NA
ENSMUSG00000029661	5988.42	1.55544	0.16775	9.27236	1.82072e-20	1.00592e-18	Col1a2
ENSMUSG00000056069	99.105	2.50768	0.270533	9.26938	1.87223e-20	1.03153e-18	Otulinl
ENSMUSG00000068196	1882.17	3.35925	0.362739	9.26081	2.02887e-20	1.11171e-18	Col8a1
ENSMUSG00000043613	377.049	2.66054	0.287304	9.26034	2.03778e-20	1.11354e-18	Mmp3
ENSMUSG00000035069	335.105	-1.37007	0.148022	-9.25591	2.12423e-20	1.15762e-18	Oma1
ENSMUSG00000034675	562.844	1.81084	0.195811	9.24786	2.29025e-20	1.2447e-18	Dbn1
ENSMUSG00000022110	5773.84	-1.19608	0.129381	-9.24467	2.35975e-20	1.279e-18	Sucla2
ENSMUSG00000034330	305.907	1.39122	0.150507	9.24355	2.38456e-20	1.28895e-18	Plcg2
ENSMUSG00000061983	4193.54	1.53175	0.166141	9.21956	2.98316e-20	1.59527e-18	Rps12
ENSMUSG00000030844	202.895	1.48182	0.160878	9.21084	3.23571e-20	1.72571e-18	Rgs10
ENSMUSG00000030319	1837.85	-1.0663	0.115776	-9.20996	3.26252e-20	1.73538e-18	Cand2
ENSMUSG00000026888	1684.8	-1.34925	0.146726	-9.19567	3.72682e-20	1.97709e-18	Grb14
ENSMUSG00000047875	831.695	-1.78941	0.194924	-9.18004	4.30915e-20	2.27997e-18	Gpr157
ENSMUSG00000078307	80.6835	3.03558	0.330974	9.17165	4.65841e-20	2.45827e-18	AI593442
ENSMUSG00000030249	2664.92	-1.83623	0.20027	-9.16875	4.7855e-20	2.51868e-18	Abcc9
ENSMUSG00000028803	470.787	-1.22138	0.133268	-9.16481	4.96337e-20	2.60545e-18	Nipal3
ENSMUSG00000020331	595.825	-1.73473	0.189402	-9.15896	5.23983e-20	2.74337e-18	Hcn2
ENSMUSG00000086290	116.082	2.06604	0.226234	9.13231	6.70523e-20	3.49231e-18	Snhg12
ENSMUSG00000018415	861.873	-1.17308	0.128502	-9.12891	6.91936e-20	3.59447e-18	Gid4
ENSMUSG00000032313	46.9408	-3.02819	0.331735	-9.12833	6.95645e-20	3.60438e-18	Tmem266
ENSMUSG00000079014	49.0202	5.295	0.58021	9.12602	7.10654e-20	3.67263e-18	Serpina3i
ENSMUSG00000025993	281.746	-1.57499	0.172659	-9.12196	7.37762e-20	3.8029e-18	Slc40a1
ENSMUSG00000059089	86.0114	2.79933	0.306898	9.12136	7.41847e-20	3.81412e-18	Fcgr4
ENSMUSG00000053398	163.308	2.27252	0.249346	9.1139	7.94735e-20	4.06514e-18	Phgdh
ENSMUSG00000042155	486.142	-1.43483	0.157781	-9.09378	9.56537e-20	4.86787e-18	Klhl23
ENSMUSG00000018339	24528.3	1.72339	0.189677	9.08589	1.02856e-19	5.22109e-18	Gpx3
ENSMUSG00000016256	1136.19	1.38227	0.152247	9.07914	1.09434e-19	5.52695e-18	Ctsz
ENSMUSG00000025651	17832.4	-1.00693	0.111034	-9.06862	1.20531e-19	6.02655e-18	Uqcrc1
ENSMUSG00000022371	1120.58	1.27122	0.140175	9.06879	1.20345e-19	6.02655e-18	Col14a1
ENSMUSG00000020695	996.626	1.20057	0.132498	9.0611	1.29143e-19	6.44102e-18	Mrc2
ENSMUSG00000037022	431.489	-1.21934	0.134623	-9.05745	1.33541e-19	6.64385e-18	Mmaa
ENSMUSG00000029771	200.906	1.48458	0.163989	9.0529	1.39215e-19	6.90895e-18	Irf5
ENSMUSG00000025887	243.557	1.82323	0.201612	9.04329	1.52025e-19	7.52601e-18	Casp12
ENSMUSG00000018593	13226.4	1.25273	0.138898	9.01906	1.89704e-19	9.36811e-18	Sparc
ENSMUSG00000092203	89.2035	2.37811	0.263989	9.00836	2.09151e-19	1.02777e-17	1110038B12Rik
ENSMUSG00000016024	391.294	2.03026	0.225695	8.9956	2.34948e-19	1.14889e-17	Lbp
ENSMUSG00000022474	606.481	1.46888	0.163387	8.99018	2.46816e-19	1.20105e-17	Pmm1
ENSMUSG00000024621	1559.4	1.03331	0.11531	8.96111	3.21424e-19	1.56031e-17	Csf1r
ENSMUSG00000038240	250.607	-1.26027	0.140722	-8.95574	3.37451e-19	1.63415e-17	Pdss2
ENSMUSG00000001774	548.817	-1.25181	0.139787	-8.95514	3.39316e-19	1.63921e-17	Chordc1
ENSMUSG00000041734	361.773	1.26781	0.141597	8.95369	3.43803e-19	1.65688e-17	Kirrel1
ENSMUSG00000025911	585.699	-1.21882	0.136276	-8.94376	3.76138e-19	1.80836e-17	Adhfe1
ENSMUSG00000050064	327.494	1.51436	0.169596	8.92923	4.28997e-19	2.05754e-17	Zfp697
ENSMUSG00000031934	102.896	2.86354	0.320755	8.92748	4.35816e-19	2.08525e-17	Panx1
ENSMUSG00000001131	806.691	4.42789	0.496127	8.9249	4.46082e-19	2.128e-17	Timp1
ENSMUSG00000049723	60.6879	3.65874	0.409957	8.92471	4.4688e-19	2.128e-17	Mmp12
ENSMUSG00000022889	629.719	-1.08075	0.121171	-8.91928	4.69342e-19	2.22437e-17	Mrpl39
ENSMUSG00000001025	1923	2.03078	0.227713	8.91813	4.74221e-19	2.24218e-17	S100a6
ENSMUSG00000028184	709.747	-1.02455	0.114968	-8.9116	5.03028e-19	2.37277e-17	Adgrl2
ENSMUSG00000034845	1106.7	1.52428	0.171064	8.9106	5.0759e-19	2.38866e-17	Plvap
ENSMUSG00000090084	179.47	1.71678	0.192716	8.90832	5.18099e-19	2.43239e-17	Srpx
ENSMUSG00000073609	299.52	-2.72607	0.306391	-8.89734	5.72033e-19	2.67305e-17	D2hgdh
ENSMUSG00000062960	1797.65	-1.1608	0.130563	-8.89068	6.07367e-19	2.83155e-17	Kdr
ENSMUSG00000027800	2827.33	1.12275	0.126352	8.88583	6.34427e-19	2.95082e-17	Tm4sf1
ENSMUSG00000015950	179.055	1.95299	0.220076	8.87419	7.04426e-19	3.2537e-17	Ncf1
ENSMUSG00000000031	970.286	1.71467	0.193309	8.87007	7.30985e-19	3.3686e-17	H19
ENSMUSG00000021508	831.122	2.30967	0.260417	8.86912	7.37236e-19	3.38959e-17	Cxcl14
ENSMUSG00000035606	204.299	-2.611	0.295118	-8.84732	8.96489e-19	4.11233e-17	Ky
ENSMUSG00000020736	274.584	1.59509	0.180384	8.84271	9.34281e-19	4.27589e-17	Nt5c
ENSMUSG00000021136	486.566	1.4251	0.161202	8.84046	9.53215e-19	4.35258e-17	Smoc1
ENSMUSG00000039084	282.118	-2.40091	0.271912	-8.82971	1.04949e-18	4.78126e-17	Chad
ENSMUSG00000022894	498.226	1.51241	0.171307	8.82865	1.0595e-18	4.81591e-17	Adamts5
ENSMUSG00000030342	1252.01	1.22764	0.139263	8.81524	1.19428e-18	5.41625e-17	Cd9
ENSMUSG00000044938	1248.41	-1.355	0.153795	-8.81044	1.24653e-18	5.64041e-17	Klhl31
ENSMUSG00000102260	161.31	2.04481	0.232122	8.80922	1.26023e-18	5.68953e-17	D330025C20Rik
ENSMUSG00000091243	213.345	1.86933	0.212429	8.7998	1.3706e-18	6.17385e-17	Vgll3
ENSMUSG00000028843	467.395	1.41845	0.161368	8.79015	1.49364e-18	6.71301e-17	Sh3bgrl3
ENSMUSG00000022817	4544.49	1.09769	0.125022	8.78	1.63479e-18	7.33091e-17	Itgb5
ENSMUSG00000000056	1265.65	-1.01381	0.115484	-8.77878	1.65253e-18	7.39389e-17	Narf
ENSMUSG00000042359	178.54	-1.77691	0.202895	-8.75777	1.99149e-18	8.87079e-17	Osbpl6
ENSMUSG00000039976	1060.69	-1.13299	0.12942	-8.75437	2.05241e-18	9.12183e-17	Tbc1d16
ENSMUSG00000024644	895.913	1.07855	0.123342	8.74439	2.24225e-18	9.92145e-17	Cndp2
ENSMUSG00000028789	101.541	2.44795	0.280049	8.74115	2.30747e-18	1.01875e-16	Azin2
ENSMUSG00000008658	353.355	-2.26697	0.259495	-8.7361	2.41303e-18	1.06301e-16	Rbfox1
ENSMUSG00000005968	97.7698	3.08634	0.353517	8.73039	2.53803e-18	1.1134e-16	Tuft1
ENSMUSG00000063594	76.5269	2.27739	0.260859	8.73036	2.53854e-18	1.1134e-16	Gng8
ENSMUSG00000025766	184.453	-1.5318	0.175489	-8.72876	2.57477e-18	1.12681e-16	D3Ertd751e
ENSMUSG00000008167	101.078	1.70915	0.196049	8.71795	2.83278e-18	1.23702e-16	Fbxw9
ENSMUSG00000018411	802.834	-1.13405	0.130103	-8.7166	2.86681e-18	1.24915e-16	Mapt
ENSMUSG00000030711	541.658	1.30319	0.14983	8.69778	3.38445e-18	1.46831e-16	Sult1a1
ENSMUSG00000028454	395.534	-1.23911	0.142649	-8.68642	3.74046e-18	1.61575e-16	Pigo
ENSMUSG00000090799	185.451	-2.39931	0.27624	-8.6856	3.7676e-18	1.62397e-16	Klhl33
ENSMUSG00000022215	147.072	-1.83818	0.211738	-8.68136	3.9107e-18	1.68202e-16	Fitm1
ENSMUSG00000028223	4627.81	-1.20466	0.13886	-8.67535	4.1227e-18	1.7694e-16	Decr1
ENSMUSG00000133849	94.6945	-1.94033	0.22377	-8.6711	4.27978e-18	1.83288e-16	NA
ENSMUSG00000036880	10979.6	-1.66025	0.19157	-8.66654	4.45461e-18	1.90368e-16	Acaa2
ENSMUSG00000028247	539.043	-1.11366	0.128706	-8.65279	5.02565e-18	2.14314e-16	Coq3
ENSMUSG00000022887	417.291	1.46646	0.169694	8.64179	5.53412e-18	2.35494e-16	Masp1
ENSMUSG00000063060	348.401	-1.55666	0.18019	-8.639	5.67068e-18	2.40793e-16	Sox7
ENSMUSG00000021130	203.489	1.64609	0.190743	8.62987	6.14226e-18	2.60265e-16	Galnt16
ENSMUSG00000031958	532.827	-1.79764	0.208501	-8.62175	6.59368e-18	2.78802e-16	Ldhd
ENSMUSG00000056737	743.99	1.8743	0.217514	8.61693	6.87708e-18	2.90172e-16	Capg
ENSMUSG00000039239	396.068	1.55808	0.180832	8.61619	6.92195e-18	2.9145e-16	Tgfb2
ENSMUSG00000018554	146.083	-2.88284	0.334725	-8.61257	7.14407e-18	3.00171e-16	Ybx2
ENSMUSG00000036860	1008	-1.00428	0.116621	-8.61151	7.21063e-18	3.02332e-16	Mrpl55
ENSMUSG00000045962	4176.8	-1.01367	0.11776	-8.608	7.4347e-18	3.11075e-16	Wnk1
ENSMUSG00000028944	1326.98	1.55566	0.180806	8.60404	7.69603e-18	3.20622e-16	Prkag2
ENSMUSG00000021597	280.203	-1.39755	0.162434	-8.60381	7.71096e-18	3.20622e-16	Slf1
ENSMUSG00000035673	550.234	1.42612	0.165805	8.60117	7.89061e-18	3.26733e-16	Sbno2
ENSMUSG00000019823	266.302	1.20749	0.140392	8.60079	7.91661e-18	3.27133e-16	Mical1
ENSMUSG00000041120	1181.42	1.58882	0.184861	8.59466	8.35139e-18	3.43679e-16	Nbl1
ENSMUSG00000020079	437.909	-1.06756	0.124241	-8.5926	8.50196e-18	3.49156e-16	Supv3l1
ENSMUSG00000031147	260.768	-1.92258	0.22376	-8.59214	8.53654e-18	3.49858e-16	Magix
ENSMUSG00000046034	681.544	1.2817	0.149184	8.59139	8.59241e-18	3.51428e-16	Otulin
ENSMUSG00000025875	402.113	1.62402	0.189037	8.591	8.62178e-18	3.5191e-16	Tspan17
ENSMUSG00000030761	290.656	1.19337	0.138948	8.58865	8.79999e-18	3.57723e-16	Myo7a
ENSMUSG00000026043	10028.5	1.51362	0.176284	8.58626	8.98438e-18	3.64478e-16	Col3a1
ENSMUSG00000022525	313.481	-1.08419	0.12644	-8.57474	9.93109e-18	4.01256e-16	Plaat1
ENSMUSG00000026202	7729.22	-1.92516	0.224716	-8.56707	1.06149e-17	4.28021e-16	Tuba4a
ENSMUSG00000042589	177.156	-1.92642	0.224913	-8.56515	1.07938e-17	4.34359e-16	Cux2
ENSMUSG00000106019	417.563	-1.43369	0.167596	-8.55443	1.18449e-17	4.757e-16	NA
ENSMUSG00000038274	6089.28	1.17058	0.136931	8.54872	1.24456e-17	4.9882e-16	Fau
ENSMUSG00000038370	3184.48	-1.09332	0.127973	-8.54337	1.30365e-17	5.20419e-16	Pcp4l1
ENSMUSG00000018927	756.938	1.9337	0.226586	8.53405	1.4131e-17	5.62989e-16	Ccl6
ENSMUSG00000042404	854.161	-1.5166	0.177776	-8.53096	1.45138e-17	5.7709e-16	Dennd4b
ENSMUSG00000027499	2479.17	-1.34166	0.157354	-8.52638	1.50997e-17	5.99195e-16	Pkia
ENSMUSG00000026712	731.822	1.33482	0.156576	8.52506	1.52728e-17	6.04864e-16	Mrc1
ENSMUSG00000036975	207.637	-1.26692	0.148732	-8.51811	1.62176e-17	6.41012e-16	Tmem177
ENSMUSG00000083563	260.353	-1.18437	0.13919	-8.50896	1.75506e-17	6.92332e-16	NA
ENSMUSG00000017897	90.0764	2.63538	0.30991	8.50369	1.83654e-17	7.23045e-16	Eya2
ENSMUSG00000022253	838.205	-1.04459	0.123006	-8.49216	2.02837e-17	7.95437e-16	Nadk2
ENSMUSG00000044086	957.511	-2.04897	0.241319	-8.49069	2.05408e-17	8.03946e-16	Lmod3
ENSMUSG00000052852	308.108	-1.16662	0.13747	-8.48635	2.13225e-17	8.3291e-16	Reep1
ENSMUSG00000024164	5273.04	1.45106	0.171053	8.48308	2.19301e-17	8.54976e-16	C3
ENSMUSG00000052316	173.831	-4.51655	0.533191	-8.4708	2.43711e-17	9.48294e-16	Lrrc15
ENSMUSG00000028737	950.94	-1.3605	0.160641	-8.46916	2.47163e-17	9.59856e-16	Aldh4a1
ENSMUSG00000055862	99.266	1.77566	0.209929	8.45837	2.71147e-17	1.04488e-15	Izumo4
ENSMUSG00000101693	104.039	-2.10909	0.249359	-8.45803	2.71934e-17	1.0459e-15	Gm19461
ENSMUSG00000031700	534.077	-1.42562	0.168565	-8.45739	2.73434e-17	1.04965e-15	Gpt2
ENSMUSG00000022257	1235.39	-1.00953	0.119559	-8.44378	3.07236e-17	1.17265e-15	Laptm4b
ENSMUSG00000049287	394.532	-1.11913	0.13257	-8.44182	3.12434e-17	1.19022e-15	Iba57
ENSMUSG00000063445	134.5	1.88688	0.22353	8.4413	3.13825e-17	1.19325e-15	Nmral1
ENSMUSG00000029762	132.664	1.56732	0.185715	8.4394	3.18967e-17	1.2105e-15	Akr1b8
ENSMUSG00000030137	1885.03	-1.71038	0.202736	-8.43651	3.26942e-17	1.23842e-15	Tuba8
ENSMUSG00000040010	349.155	1.73417	0.205573	8.43578	3.29001e-17	1.24386e-15	Slc7a5
ENSMUSG00000003559	674.916	-1.36049	0.161341	-8.4324	3.38634e-17	1.27787e-15	As3mt
ENSMUSG00000032826	1193.42	-1.21397	0.144284	-8.41375	3.97097e-17	1.49566e-15	Ank2
ENSMUSG00000021906	717.05	-1.04754	0.124569	-8.40931	4.12413e-17	1.54752e-15	Oxnad1
ENSMUSG00000071540	1360.69	-1.05264	0.1252	-8.40765	4.18306e-17	1.56669e-15	3425401B19Rik
ENSMUSG00000015745	1644.84	1.17387	0.139724	8.40137	4.41305e-17	1.64974e-15	Plekho1
ENSMUSG00000026956	344.701	1.27523	0.152068	8.38589	5.03421e-17	1.87844e-15	Uap1l1
ENSMUSG00000017817	10474.3	-1.10319	0.131617	-8.38181	5.2118e-17	1.94108e-15	Jph2
ENSMUSG00000049858	342.431	-1.0616	0.126949	-8.36244	6.14354e-17	2.27961e-15	Suox
ENSMUSG00000037110	655.545	-1.04629	0.125359	-8.34633	7.04147e-17	2.60795e-15	Ralgapa2
ENSMUSG00000035936	274.882	-1.38801	0.166415	-8.34068	7.38615e-17	2.73056e-15	Aldh5a1
ENSMUSG00000037949	963.12	-1.61208	0.193291	-8.34019	7.41698e-17	2.73689e-15	Ano10
ENSMUSG00000040613	167.604	2.26022	0.271136	8.33613	7.67591e-17	2.82722e-15	Apobec1
ENSMUSG00000040133	49.4388	4.03444	0.484024	8.33521	7.73601e-17	2.84412e-15	Gpr176
ENSMUSG00000024743	494.237	-1.5096	0.181149	-8.33348	7.85011e-17	2.88077e-15	Syt7
ENSMUSG00000021236	2237.78	-1.54241	0.185271	-8.32519	8.41903e-17	3.08389e-15	Entpd5
ENSMUSG00000064345	201041	-1.21142	0.14553	-8.32419	8.49061e-17	3.10443e-15	mt-Nd2
ENSMUSG00000024410	316.331	-1.13344	0.136248	-8.31893	8.8764e-17	3.23956e-15	Rmc1
ENSMUSG00000019990	190.1	-1.32539	0.159404	-8.31465	9.20216e-17	3.35234e-15	Pde7b
ENSMUSG00000005580	150.233	-1.59657	0.192318	-8.30172	1.02614e-16	3.73142e-15	Adcy9
ENSMUSG00000027784	601.514	-1.32421	0.159672	-8.29331	1.1014e-16	3.99784e-15	Ppm1l
ENSMUSG00000045284	70.984	-2.27283	0.274657	-8.27514	1.28303e-16	4.64867e-15	Dcaf12l1
ENSMUSG00000030208	2689.03	1.79479	0.21691	8.27434	1.29166e-16	4.67147e-15	Emp1
ENSMUSG00000051579	515.649	1.07706	0.130286	8.26685	1.37546e-16	4.96556e-15	Tceal8
ENSMUSG00000044583	101.264	2.06501	0.249855	8.26483	1.39898e-16	5.04137e-15	Tlr7
ENSMUSG00000064339	59585.2	-1.60114	0.193744	-8.26418	1.40655e-16	5.05952e-15	NA
ENSMUSG00000026589	120.652	2.13393	0.258228	8.26376	1.41156e-16	5.06845e-15	Sec16b
ENSMUSG00000096957	310.527	1.76653	0.214338	8.24178	1.6967e-16	6.07049e-15	NA
ENSMUSG00000011305	1505.06	-1.54525	0.187547	-8.23925	1.73287e-16	6.18881e-15	Plin5
ENSMUSG00000120849	400.484	2.09651	0.254511	8.2374	1.75996e-16	6.27437e-15	NA
ENSMUSG00000043154	3117.74	-1.36401	0.165692	-8.2322	1.83804e-16	6.54108e-15	Ppp2r3a
ENSMUSG00000019828	215.011	-1.74663	0.212217	-8.23041	1.86579e-16	6.62802e-15	Grm1
ENSMUSG00000129645	251.251	-2.10763	0.256151	-8.22807	1.9025e-16	6.7345e-15	Gm53575
ENSMUSG00000052726	120.841	1.89457	0.230611	8.21546	2.11353e-16	7.4683e-15	Kcnt2
ENSMUSG00000026249	964.635	1.07767	0.13118	8.21517	2.11872e-16	7.47343e-15	Serpine2
ENSMUSG00000045875	83.5479	-2.25567	0.274638	-8.21323	2.1532e-16	7.56837e-15	Adra1a
ENSMUSG00000037523	991.364	-1.03099	0.12556	-8.2111	2.19163e-16	7.68994e-15	Mavs
ENSMUSG00000060147	2371.11	1.02054	0.124329	8.20836	2.24237e-16	7.85417e-15	Serpinb6a
ENSMUSG00000038302	536.955	-1.16371	0.141853	-8.20365	2.33195e-16	8.15367e-15	Afg1l
ENSMUSG00000022346	174.773	2.34588	0.286484	8.18851	2.64478e-16	9.23133e-15	Myc
ENSMUSG00000027254	338.517	1.87312	0.228828	8.18571	2.70703e-16	9.43214e-15	Map1a
ENSMUSG00000045100	359.278	-1.42601	0.174493	-8.17231	3.02527e-16	1.05044e-14	Slc25a26
ENSMUSG00000037490	73.7005	-2.53733	0.31074	-8.16543	3.20289e-16	1.11019e-14	Slc2a12
ENSMUSG00000031508	633.917	1.01939	0.12498	8.15638	3.45217e-16	1.19452e-14	Ankrd10
ENSMUSG00000027022	6515.73	1.08061	0.13249	8.15616	3.45853e-16	1.19466e-14	Xirp2
ENSMUSG00000067369	779.916	-1.04103	0.12767	-8.15407	3.51875e-16	1.21127e-14	Trmt2b
ENSMUSG00000079641	3246.17	1.10745	0.135851	8.15195	3.581e-16	1.23059e-14	Rpl39
ENSMUSG00000031111	225.483	-1.22909	0.150817	-8.14953	3.65338e-16	1.2533e-14	Igsf1
ENSMUSG00000021567	124.556	2.23882	0.275631	8.12255	4.56497e-16	1.56067e-14	Nkd2
ENSMUSG00000031343	132.407	1.82249	0.224443	8.12006	4.65949e-16	1.59027e-14	Gabra3
ENSMUSG00000079523	1505.17	1.35389	0.16677	8.11832	4.72672e-16	1.60799e-14	Tmsb10
ENSMUSG00000071324	431.042	-1.98527	0.244543	-8.1183	4.7275e-16	1.60799e-14	Armc2
ENSMUSG00000001983	328.075	-1.21645	0.149866	-8.11694	4.78083e-16	1.62315e-14	Taco1
ENSMUSG00000030123	1713.81	-1.1833	0.145799	-8.11599	4.81832e-16	1.63057e-14	Plxnd1
ENSMUSG00000081895	145.324	1.95735	0.241247	8.11348	4.91917e-16	1.65908e-14	Rpl17-ps10
ENSMUSG00000018819	1276.78	1.27486	0.157292	8.10507	5.27144e-16	1.77191e-14	Lsp1
ENSMUSG00000039168	1144.94	1.45598	0.179677	8.10332	5.34778e-16	1.79456e-14	Dap
ENSMUSG00000044206	151.18	2.16015	0.267066	8.08845	6.043e-16	2.0177e-14	Vsig4
ENSMUSG00000061207	192.185	1.28042	0.158358	8.08564	6.1841e-16	2.06137e-14	Stk19
ENSMUSG00000056204	425.459	-1.22338	0.151361	-8.08252	6.34415e-16	2.10769e-14	Pgpep1
ENSMUSG00000039405	373.269	1.46818	0.181723	8.07918	6.52016e-16	2.16257e-14	Prss23
ENSMUSG00000028841	236.901	1.58209	0.195873	8.07713	6.63109e-16	2.19573e-14	Cnksr1
ENSMUSG00000004655	5589.78	-1.32559	0.164342	-8.06605	7.26074e-16	2.40024e-14	Aqp1
ENSMUSG00000032500	41.9071	3.92653	0.487398	8.05611	7.87627e-16	2.59943e-14	Dclk3
ENSMUSG00000032435	1586.2	1.007	0.125076	8.05106	8.20824e-16	2.70008e-14	Dync1li1
ENSMUSG00000029622	1857.36	1.32849	0.165044	8.04932	8.32525e-16	2.7324e-14	Arpc1b
ENSMUSG00000071714	88.528	2.37165	0.294644	8.0492	8.33383e-16	2.7324e-14	Csf2rb2
ENSMUSG00000072946	983.026	-1.23933	0.15411	-8.0418	8.85317e-16	2.89319e-14	Ptgr2
ENSMUSG00000056174	203.273	2.0801	0.258816	8.03701	9.20562e-16	3.00347e-14	Col8a2
ENSMUSG00000021868	1846.14	-1.49338	0.185969	-8.03023	9.7289e-16	3.16902e-14	Ppif
ENSMUSG00000022965	2380.78	-1.05113	0.131023	-8.02245	1.03657e-15	3.36548e-14	Ifngr2
ENSMUSG00000026437	305.249	-1.375	0.171437	-8.02043	1.05379e-15	3.41584e-14	Cdk18
ENSMUSG00000021238	2164.19	-1.20913	0.150821	-8.017	1.08357e-15	3.50102e-14	Aldh6a1
ENSMUSG00000033777	116.632	2.69096	0.335991	8.00904	1.15609e-15	3.72332e-14	Tlr13
ENSMUSG00000020593	2290.03	-1.47021	0.183565	-8.00922	1.15434e-15	3.72332e-14	Lpin1
ENSMUSG00000019763	308.984	-1.59662	0.19947	-8.0043	1.20151e-15	3.86337e-14	Rmnd1
ENSMUSG00000031647	128.97	-1.60334	0.200407	-8.00042	1.23996e-15	3.97423e-14	Mfap3l
ENSMUSG00000026536	91.8419	2.08736	0.261378	7.986	1.39388e-15	4.4533e-14	Ifi211
ENSMUSG00000038900	7321.59	1.2832	0.16069	7.98558	1.39867e-15	4.46145e-14	Rpl12
ENSMUSG00000059408	49.9252	-3.4577	0.433046	-7.9846	1.40981e-15	4.48985e-14	Mrgprh
ENSMUSG00000004609	130.682	1.64162	0.205658	7.98228	1.43651e-15	4.56759e-14	Cd33
ENSMUSG00000116903	58.3156	-2.80016	0.351297	-7.97093	1.57487e-15	4.98377e-14	Gm19522
ENSMUSG00000025486	293.115	-1.08962	0.136806	-7.96475	1.65563e-15	5.23106e-14	Sirt3
ENSMUSG00000025044	115.492	2.13411	0.26816	7.95835	1.74348e-15	5.49992e-14	Msr1
ENSMUSG00000051048	37.0299	3.83127	0.481456	7.95768	1.753e-15	5.52125e-14	P4ha3
ENSMUSG00000029304	313.817	3.95117	0.496547	7.95729	1.75855e-15	5.53002e-14	Spp1
ENSMUSG00000060512	52.0651	-2.30243	0.289432	-7.955	1.79137e-15	5.62438e-14	Pgcka1
ENSMUSG00000031451	5951.76	1.24391	0.156427	7.95202	1.83499e-15	5.75233e-14	Gas6
ENSMUSG00000054027	724.613	-1.13615	0.142893	-7.95101	1.84992e-15	5.781e-14	Nt5dc3
ENSMUSG00000097184	78.5513	-2.23469	0.281072	-7.95058	1.85645e-15	5.78614e-14	4632428C04Rik
ENSMUSG00000120773	35.4462	-6.26787	0.788966	-7.9444	1.95131e-15	6.06938e-14	Gm32113
ENSMUSG00000039763	433.313	-1.96667	0.247698	-7.9398	2.02511e-15	6.28917e-14	Dnajc28
ENSMUSG00000038582	1135.69	-1.35182	0.170369	-7.93467	2.11048e-15	6.54413e-14	Pptc7
ENSMUSG00000038583	14082.5	-1.14282	0.144124	-7.92938	2.2024e-15	6.81857e-14	Pln
ENSMUSG00000053646	488.457	-1.79236	0.226088	-7.9277	2.23247e-15	6.90098e-14	Plxnb1
ENSMUSG00000015094	957.6	1.0908	0.137817	7.91487	2.47518e-15	7.63943e-14	Npdc1
ENSMUSG00000033467	333.861	1.39411	0.176176	7.91312	2.51015e-15	7.73543e-14	Crlf2
ENSMUSG00000026605	206.234	-2.57561	0.326094	-7.89838	2.82545e-15	8.6937e-14	Cenpf
ENSMUSG00000002111	279.093	1.71912	0.217685	7.89729	2.85037e-15	8.75691e-14	Spi1
ENSMUSG00000023938	231.605	-1.16125	0.147149	-7.89168	2.98142e-15	9.14545e-14	Aars2
ENSMUSG00000039747	67.2755	2.35262	0.298148	7.89078	3.00307e-15	9.19777e-14	Orai2
ENSMUSG00000017344	414.827	-1.45593	0.18452	-7.89033	3.01385e-15	9.21667e-14	Vtn
ENSMUSG00000031907	114.189	1.58592	0.201112	7.88576	3.12627e-15	9.54587e-14	Zfp90
ENSMUSG00000025608	2252.61	-1.06976	0.135677	-7.88458	3.15594e-15	9.60713e-14	Podxl
ENSMUSG00000024598	49.3608	2.6282	0.333595	7.87842	3.31543e-15	1.00773e-13	Fbn2
ENSMUSG00000001942	254.25	-1.29979	0.165181	-7.8689	3.57779e-15	1.0809e-13	Siae
ENSMUSG00000032322	81.83	1.90744	0.242425	7.86816	3.59886e-15	1.08563e-13	Pstpip1
ENSMUSG00000066975	54.3005	-2.6039	0.331262	-7.86053	3.82502e-15	1.14865e-13	Cryba4
ENSMUSG00000021388	848.283	1.81038	0.230558	7.85218	4.08862e-15	1.22414e-13	Aspn
ENSMUSG00000022089	231.166	1.21816	0.155227	7.8476	4.24068e-15	1.26777e-13	Bin3
ENSMUSG00000014426	650.302	-1.00608	0.128258	-7.84413	4.35953e-15	1.30135e-13	Map3k4
ENSMUSG00000001143	390.281	-1.25136	0.159625	-7.83939	4.52751e-15	1.34747e-13	Lman2l
ENSMUSG00000103476	27.8018	-4.15285	0.530046	-7.83489	4.69272e-15	1.39277e-13	Strit1
ENSMUSG00000022964	914.368	-1.00937	0.128856	-7.83331	4.75192e-15	1.40798e-13	Tmem50b
ENSMUSG00000041616	7685.2	2.88627	0.368763	7.82689	5.00106e-15	1.4796e-13	Nppa
ENSMUSG00000023191	529.55	1.12601	0.144106	7.8138	5.54882e-15	1.63441e-13	P3h3
ENSMUSG00000023046	1360.47	1.55681	0.199272	7.81248	5.60749e-15	1.64926e-13	Igfbp6
ENSMUSG00000027506	682.884	1.18341	0.151509	7.81081	5.68231e-15	1.66881e-13	Tpd52
ENSMUSG00000009687	751.76	1.73259	0.222162	7.79874	6.25303e-15	1.83373e-13	Fxyd5
ENSMUSG00000027832	88.9578	2.91461	0.373791	7.79742	6.31833e-15	1.85017e-13	Ptx3
ENSMUSG00000030074	247.01	1.8591	0.238569	7.79273	6.55745e-15	1.91738e-13	Gxylt2
ENSMUSG00000022244	364.639	-1.09956	0.141143	-7.79041	6.679e-15	1.94832e-13	Amacr
ENSMUSG00000022952	100.06	2.18051	0.279899	7.79034	6.68275e-15	1.94832e-13	Runx1
ENSMUSG00000036980	196.357	-1.48935	0.191238	-7.78793	6.81185e-15	1.98307e-13	Taf6
ENSMUSG00000039481	2144.17	1.35781	0.174448	7.78343	7.05831e-15	2.05183e-13	Nrtn
ENSMUSG00000038156	780.806	1.10885	0.142522	7.78021	7.24052e-15	2.10175e-13	Spon1
ENSMUSG00000029321	184.822	2.45114	0.315086	7.77929	7.29354e-15	2.11407e-13	Slc10a6
ENSMUSG00000098234	213.146	1.53771	0.19774	7.77642	7.46042e-15	2.15931e-13	Snhg6
ENSMUSG00000054277	427.371	1.17639	0.15129	7.77575	7.50047e-15	2.16776e-13	Arfgap3
ENSMUSG00000031448	6503.36	-1.12859	0.145153	-7.77513	7.53702e-15	2.17518e-13	Adprhl1
ENSMUSG00000038668	348.296	1.55064	0.199526	7.77163	7.74856e-15	2.2298e-13	Lpar1
ENSMUSG00000064337	30167.7	-1.23659	0.159204	-7.76734	8.01496e-15	2.29985e-13	NA
ENSMUSG00000021260	131.436	2.64765	0.341008	7.76418	8.21758e-15	2.35461e-13	Hhipl1
ENSMUSG00000037211	875.379	1.27348	0.164074	7.76161	8.38584e-15	2.39607e-13	Spry1
ENSMUSG00000020034	1603.18	-1.06664	0.137426	-7.7616	8.38625e-15	2.39607e-13	Tcp11l2
ENSMUSG00000021423	132.909	2.03254	0.26193	7.75987	8.50141e-15	2.42551e-13	Ly86
ENSMUSG00000129832	80.8012	-2.82544	0.364567	-7.75011	9.18126e-15	2.61574e-13	Gm7889
ENSMUSG00000027424	259.586	-1.30112	0.167901	-7.74931	9.23942e-15	2.62857e-13	Mgme1
ENSMUSG00000027894	111.069	-2.15101	0.277677	-7.74643	9.45116e-15	2.68118e-13	Slc6a17
ENSMUSG00000012535	464.839	-1.09157	0.141017	-7.74069	9.8875e-15	2.80099e-13	Tnpo3
ENSMUSG00000036278	3867.15	-1.12551	0.145491	-7.73596	1.02628e-14	2.8991e-13	Macrod1
ENSMUSG00000005360	107.579	2.01768	0.260892	7.73377	1.0441e-14	2.94528e-13	Slc1a3
ENSMUSG00000031636	904.714	1.46927	0.190144	7.72716	1.09976e-14	3.09355e-13	Pdlim3
ENSMUSG00000027613	634.285	1.21232	0.156902	7.72659	1.10465e-14	3.10296e-13	Eif6
ENSMUSG00000018217	1948.48	1.21977	0.158042	7.71805	1.18119e-14	3.30867e-13	Pmp22
ENSMUSG00000020773	1339.62	1.26671	0.164159	7.71636	1.19697e-14	3.34815e-13	Trim47
ENSMUSG00000047205	757.989	-1.30294	0.168873	-7.71553	1.20483e-14	3.36543e-13	Dusp18
ENSMUSG00000046688	91.0517	1.71917	0.223013	7.70882	1.26985e-14	3.54213e-13	Tifa
ENSMUSG00000029575	474.887	-1.12794	0.146339	-7.70769	1.28112e-14	3.56857e-13	Mmab
ENSMUSG00000053460	314.823	-1.29821	0.168651	-7.69762	1.38627e-14	3.85076e-13	Ggcx
ENSMUSG00000059456	297.661	1.59841	0.207678	7.69658	1.39758e-14	3.87677e-13	Ptk2b
ENSMUSG00000071001	136.036	1.37439	0.178808	7.68636	1.51377e-14	4.19328e-13	Hrct1
ENSMUSG00000033124	516.141	-1.2791	0.166651	-7.67528	1.65057e-14	4.55959e-13	Atg9a
ENSMUSG00000046070	83.9539	-2.00338	0.261055	-7.67419	1.66473e-14	4.58602e-13	Igfals
ENSMUSG00000042821	100.575	1.59345	0.207649	7.67378	1.66999e-14	4.59421e-13	Snai1
ENSMUSG00000079017	1065.75	1.88307	0.245538	7.66917	1.73116e-14	4.75594e-13	Ifi27l2a
ENSMUSG00000020053	441.323	1.44386	0.188354	7.66563	1.7795e-14	4.88204e-13	Igf1
ENSMUSG00000055541	92.1561	2.31888	0.302558	7.66426	1.79862e-14	4.92365e-13	Lair1
ENSMUSG00000069515	108.706	2.61657	0.341401	7.66419	1.7996e-14	4.92365e-13	Lyz1
ENSMUSG00000090733	5289.96	1.10539	0.144234	7.66384	1.80457e-14	4.93052e-13	Rps27
ENSMUSG00000040557	45.1529	2.50742	0.327216	7.66289	1.81801e-14	4.96045e-13	Mettl27
ENSMUSG00000042647	1435.06	-1.62029	0.211578	-7.65812	1.88677e-14	5.13408e-13	Acad12
ENSMUSG00000110353	67.2492	-2.48558	0.324801	-7.6526	1.96951e-14	5.34467e-13	Gm33543
ENSMUSG00000042406	2331.98	1.24175	0.162527	7.64031	2.16693e-14	5.85658e-13	Atf4
ENSMUSG00000020435	232.015	-1.52245	0.199416	-7.63456	2.26587e-14	6.11571e-13	Osbp2
ENSMUSG00000021432	118.184	1.54847	0.203038	7.62651	2.41201e-14	6.50138e-13	Slc35b3
ENSMUSG00000040528	33.1433	3.13823	0.411548	7.62542	2.43244e-14	6.54761e-13	Milr1
ENSMUSG00000028085	695.426	-1.06902	0.140212	-7.62432	2.45319e-14	6.59459e-13	Gatb
ENSMUSG00000040640	44.1531	2.50666	0.328924	7.62078	2.52154e-14	6.75111e-13	Erc2
ENSMUSG00000029675	4703.7	2.93502	0.385309	7.61733	2.58986e-14	6.91551e-13	Eln
ENSMUSG00000029432	3305.33	-1.17058	0.15372	-7.61502	2.63648e-14	7.0306e-13	Nipsnap2
ENSMUSG00000042453	131.334	1.45524	0.191231	7.60984	2.74428e-14	7.29861e-13	Reln
ENSMUSG00000064302	3836.18	-1.38154	0.181655	-7.60528	2.84297e-14	7.55105e-13	Clasp1
ENSMUSG00000075232	1531.74	-1.43694	0.189036	-7.60142	2.92897e-14	7.76411e-13	Amd1
ENSMUSG00000027346	2268.23	-1.43222	0.188589	-7.59442	3.09174e-14	8.17922e-13	Gpcpd1
ENSMUSG00000042834	274.769	-1.62575	0.214174	-7.59078	3.17987e-14	8.40124e-13	Nrep
ENSMUSG00000038121	908.899	-1.05705	0.139298	-7.58843	3.23803e-14	8.53236e-13	Fam210a
ENSMUSG00000062054	292.509	1.01298	0.133542	7.58548	3.31251e-14	8.71714e-13	Iah1
ENSMUSG00000029685	603.841	-2.12441	0.280135	-7.5835	3.36367e-14	8.84013e-13	Asb15
ENSMUSG00000028743	990.281	-1.10585	0.14592	-7.57844	3.4973e-14	9.16722e-13	Akr7a5
ENSMUSG00000060791	97.5117	1.80383	0.238162	7.57397	3.61993e-14	9.47625e-13	Gmfg
ENSMUSG00000042642	216.739	-1.17825	0.155847	-7.56031	4.02105e-14	1.04988e-12	Flad1
ENSMUSG00000052837	943.179	1.66091	0.219859	7.55441	4.20759e-14	1.09573e-12	Junb
ENSMUSG00000056973	1526.14	-3.54699	0.469811	-7.54983	4.35827e-14	1.13349e-12	Ces1d
ENSMUSG00000031453	714.662	1.11621	0.147866	7.5488	4.39292e-14	1.14102e-12	Rasa3
ENSMUSG00000037563	5518.45	1.05091	0.139291	7.54469	4.53349e-14	1.176e-12	Rps16
ENSMUSG00000033044	1807.83	-1.63588	0.216926	-7.54121	4.65647e-14	1.20322e-12	Dhrs7c
ENSMUSG00000054871	217.12	2.12119	0.281439	7.53694	4.81129e-14	1.24162e-12	Tmem158
ENSMUSG00000020935	773.855	-1.36328	0.180894	-7.53633	4.83364e-14	1.24418e-12	Dcakd
ENSMUSG00000005615	1056.02	-1.03033	0.136747	-7.53457	4.89941e-14	1.25949e-12	Pcyt1a
ENSMUSG00000079293	124.751	2.69605	0.358091	7.52896	5.11456e-14	1.31194e-12	Clec7a
ENSMUSG00000049871	64.5611	2.04777	0.271988	7.52891	5.11657e-14	1.31194e-12	Nlrc3
ENSMUSG00000022754	277.213	2.04119	0.271138	7.52823	5.14311e-14	1.31706e-12	Tmem45a
ENSMUSG00000044548	142.811	1.54825	0.205757	7.52468	5.28507e-14	1.35168e-12	Dact1
ENSMUSG00000085069	71.1142	-1.80755	0.240261	-7.52328	5.34176e-14	1.36293e-12	Prdm16os
ENSMUSG00000111765	37.2139	-4.1178	0.547365	-7.52295	5.35531e-14	1.36441e-12	Gm10635
ENSMUSG00000000682	174.363	2.12036	0.282107	7.51615	5.64138e-14	1.43547e-12	Cd52
ENSMUSG00000035232	174.094	1.38751	0.184641	7.51463	5.70729e-14	1.45039e-12	Pdk3
ENSMUSG00000050541	690.792	-1.44789	0.192818	-7.50907	5.95505e-14	1.51143e-12	Adra1b
ENSMUSG00000029821	145.457	1.38843	0.184907	7.50879	5.96748e-14	1.51267e-12	Gsdme
ENSMUSG00000028923	499.292	1.09655	0.146156	7.50261	6.25614e-14	1.58183e-12	Necap2
ENSMUSG00000052496	101.985	-1.56218	0.208276	-7.50054	6.35571e-14	1.60498e-12	Pkdrej
ENSMUSG00000004626	118.353	1.66895	0.222561	7.49884	6.43843e-14	1.62381e-12	Stxbp2
ENSMUSG00000040147	709.988	-1.32621	0.176921	-7.4961	6.57449e-14	1.65604e-12	Maob
ENSMUSG00000021765	46.0775	2.94346	0.393074	7.48832	6.97623e-14	1.75282e-12	Fst
ENSMUSG00000028393	686.169	-1.2235	0.163529	-7.48188	7.3268e-14	1.8386e-12	Alad
ENSMUSG00000026358	30.1017	5.44161	0.727591	7.47894	7.49269e-14	1.87552e-12	Rgs1
ENSMUSG00000005054	411.575	1.35352	0.181012	7.4775	7.57483e-14	1.89371e-12	Cstb
ENSMUSG00000020186	1092.29	1.59811	0.213778	7.47555	7.68811e-14	1.91963e-12	Csrp2
ENSMUSG00000007613	516.755	1.20463	0.161193	7.4732	7.82649e-14	1.95174e-12	Tgfbr1
ENSMUSG00000027820	70.1629	-2.24599	0.300678	-7.46974	8.03549e-14	2.00137e-12	Mme
ENSMUSG00000062328	7697.98	1.03244	0.138369	7.46151	8.55368e-14	2.12778e-12	Rpl17
ENSMUSG00000042010	3795.62	-1.18528	0.158987	-7.45523	8.97117e-14	2.2261e-12	Acacb
ENSMUSG00000056423	81.7139	3.50624	0.470362	7.45434	9.03198e-14	2.23841e-12	Uts2b
ENSMUSG00000019945	166.449	-1.79407	0.240779	-7.45111	9.25584e-14	2.29105e-12	Cabcoco1
ENSMUSG00000104348	73.1491	-2.2913	0.307744	-7.44545	9.66114e-14	2.38842e-12	NA
ENSMUSG00000018042	2908.07	1.30304	0.175176	7.43845	1.0187e-13	2.51531e-12	Cyb5r3
ENSMUSG00000020901	75.4351	2.08308	0.280062	7.43793	1.02273e-13	2.52214e-12	Pik3r5
ENSMUSG00000047617	347.912	1.34224	0.180513	7.43569	1.04027e-13	2.55281e-12	Paxx
ENSMUSG00000004508	594.278	1.24683	0.167681	7.43571	1.04004e-13	2.55281e-12	Gab2
ENSMUSG00000025537	256.774	-2.35662	0.317034	-7.43334	1.05889e-13	2.59531e-12	Phkg1
ENSMUSG00000032666	1073.23	1.0781	0.145233	7.42329	1.14245e-13	2.78986e-12	1700025G04Rik
ENSMUSG00000035273	60.7439	1.99502	0.269075	7.41435	1.22221e-13	2.97738e-12	Hpse
ENSMUSG00000028307	58.6371	-2.91192	0.392819	-7.41288	1.23585e-13	3.00549e-12	Aldob
ENSMUSG00000047658	135.738	-2.57473	0.347336	-7.41278	1.23676e-13	3.00549e-12	Gal3st3
ENSMUSG00000138178	114.071	-1.36458	0.184157	-7.40989	1.26408e-13	3.06816e-12	NA
ENSMUSG00000031137	778.377	-1.01728	0.137432	-7.40205	1.34096e-13	3.24687e-12	Fgf13
ENSMUSG00000025586	330.47	1.10632	0.149533	7.39851	1.3772e-13	3.33059e-12	Cpeb1
ENSMUSG00000052160	370.22	1.57123	0.2124	7.39751	1.3876e-13	3.35168e-12	Pld4
ENSMUSG00000021223	93.9075	-1.82648	0.247475	-7.38046	1.5774e-13	3.79638e-12	Papln
ENSMUSG00000101086	61.6312	-2.35566	0.319335	-7.37676	1.62189e-13	3.89878e-12	Gm28651
ENSMUSG00000053286	292.906	-1.10601	0.149949	-7.37591	1.63224e-13	3.91895e-12	Trmt1l
ENSMUSG00000022040	2993.53	-1.10682	0.150088	-7.3745	1.64957e-13	3.9558e-12	Ephx2
ENSMUSG00000063428	467.57	-1.11263	0.15108	-7.36448	1.77833e-13	4.25947e-12	Ddo
ENSMUSG00000061740	716.903	1.1783	0.160012	7.36383	1.7871e-13	4.27537e-12	Cyp2d22
ENSMUSG00000015947	111.541	2.22985	0.302829	7.36341	1.79272e-13	4.27856e-12	Fcgr1
ENSMUSG00000037818	518.962	-1.53934	0.209131	-7.36062	1.83064e-13	4.35866e-12	Abhd18
ENSMUSG00000015340	351.303	1.80732	0.24564	7.35762	1.87217e-13	4.45226e-12	Cybb
ENSMUSG00000097697	52.4581	4.11743	0.559941	7.35334	1.93319e-13	4.58645e-12	4833412C05Rik
ENSMUSG00000028613	103.241	3.28363	0.447065	7.34487	2.05964e-13	4.88067e-12	Lrp8
ENSMUSG00000036854	12108.5	-1.25678	0.17118	-7.34185	2.10662e-13	4.98609e-12	Hspb6
ENSMUSG00000047139	298.723	2.22695	0.303433	7.33917	2.14929e-13	5.08107e-12	Cd24a
ENSMUSG00000025241	2687.57	-1.13987	0.155337	-7.33806	2.16706e-13	5.11702e-12	Fyco1
ENSMUSG00000043008	190.048	1.20444	0.16416	7.33701	2.18419e-13	5.15139e-12	Klhl6
ENSMUSG00000029338	1885.6	-1.04701	0.142771	-7.33348	2.24252e-13	5.28274e-12	Antxr2
ENSMUSG00000046949	340.118	-1.11986	0.152971	-7.32074	2.46611e-13	5.78899e-12	Nqo2
ENSMUSG00000033610	714.746	-1.03301	0.141449	-7.30304	2.81334e-13	6.58863e-12	Pank1
ENSMUSG00000053093	6055.97	3.10076	0.425034	7.29532	2.97945e-13	6.96132e-12	Myh7
ENSMUSG00000031767	791.183	-1.00374	0.137592	-7.29506	2.98536e-13	6.967e-12	Nudt7
ENSMUSG00000021268	258.471	1.52359	0.208949	7.29171	3.06047e-13	7.12565e-12	Meg3
ENSMUSG00000019851	4721.52	1.00721	0.138159	7.29024	3.09401e-13	7.19536e-12	Perp
ENSMUSG00000027762	24.8857	4.12171	0.567267	7.26591	3.70545e-13	8.59733e-12	Sucnr1
ENSMUSG00000025804	78.7703	3.22808	0.444287	7.26575	3.70982e-13	8.59749e-12	Ccr1
ENSMUSG00000032565	137.324	1.53401	0.211149	7.26504	3.72927e-13	8.63257e-12	Nudt16
ENSMUSG00000026858	888.812	-1.35174	0.186088	-7.26397	3.75881e-13	8.69089e-12	Miga2
ENSMUSG00000033295	223.889	1.31267	0.180894	7.25659	3.96976e-13	9.15029e-12	Ptprf
ENSMUSG00000066456	83.5193	1.69208	0.233258	7.25412	4.0427e-13	9.30426e-12	Hmgn3
ENSMUSG00000007039	678.181	1.00532	0.138633	7.25163	4.1178e-13	9.46622e-12	Ddah2
ENSMUSG00000021338	92.9996	1.71124	0.236241	7.24361	4.36881e-13	1.00087e-11	Carmil1
ENSMUSG00000043122	465.642	-1.54424	0.213243	-7.2417	4.43097e-13	1.01395e-11	A530016L24Rik
ENSMUSG00000040552	231.457	2.05466	0.283908	7.23705	4.58557e-13	1.04813e-11	C3ar1
ENSMUSG00000032332	195.297	2.60209	0.359676	7.23455	4.67062e-13	1.06514e-11	Col12a1
ENSMUSG00000056515	710.105	1.43341	0.19813	7.23468	4.66612e-13	1.06514e-11	Rab31
ENSMUSG00000001750	486.244	1.64636	0.227759	7.22851	4.88314e-13	1.11107e-11	Tcirg1
ENSMUSG00000045679	204.726	1.52694	0.211293	7.22665	4.9506e-13	1.12514e-11	Slc66a3
ENSMUSG00000029377	40.1192	3.96556	0.549132	7.2215	5.14172e-13	1.16725e-11	Ereg
ENSMUSG00000059326	307.188	1.50184	0.208155	7.215	5.3934e-13	1.22023e-11	Csf2ra
ENSMUSG00000014498	448.419	-1.1127	0.154253	-7.2135	5.45331e-13	1.23239e-11	Ankrd52
ENSMUSG00000022868	254.433	2.31686	0.321408	7.20847	5.65859e-13	1.27589e-11	Ahsg
ENSMUSG00000120878	58.4005	3.13698	0.435287	7.2067	5.7322e-13	1.29104e-11	NA
ENSMUSG00000026072	349.09	1.02978	0.142945	7.20405	5.84495e-13	1.31495e-11	Il1r1
ENSMUSG00000035620	478.169	-1.1241	0.156046	-7.20363	5.8632e-13	1.31757e-11	Ric8b
ENSMUSG00000035356	105.217	1.55603	0.216051	7.20216	5.92643e-13	1.33029e-11	Nfkbiz
ENSMUSG00000025140	84.5882	1.95919	0.272296	7.19507	6.24271e-13	1.39971e-11	Pycr1
ENSMUSG00000021573	247.684	-1.62263	0.225684	-7.18983	6.48742e-13	1.45132e-11	Tppp
ENSMUSG00000034116	90.332	1.94662	0.2709	7.18573	6.68488e-13	1.49383e-11	Vav1
ENSMUSG00000063564	106.009	1.46892	0.204603	7.17938	7.003e-13	1.56317e-11	Col23a1
ENSMUSG00000030148	65.4204	2.18588	0.304518	7.17815	7.06626e-13	1.57553e-11	Clec4a2
ENSMUSG00000031849	3130.07	2.90683	0.404982	7.17767	7.09102e-13	1.57929e-11	Comp
ENSMUSG00000062753	120.764	1.40633	0.195948	7.17703	7.12405e-13	1.58488e-11	Smim29
ENSMUSG00000018008	325.786	1.52677	0.212737	7.17676	7.13837e-13	1.58631e-11	Cyth4
ENSMUSG00000043140	332.267	-1.15823	0.161413	-7.17556	7.20128e-13	1.59851e-11	Tmem186
ENSMUSG00000030786	77.5287	1.87105	0.260889	7.17184	7.39981e-13	1.63935e-11	Itgam
ENSMUSG00000002059	85.7945	1.53066	0.213427	7.1718	7.40165e-13	1.63935e-11	Rab34
ENSMUSG00000038248	272.079	-1.17764	0.164355	-7.16527	7.76347e-13	1.71379e-11	Sobp
ENSMUSG00000112593	72.3166	-1.77411	0.247595	-7.16539	7.75628e-13	1.71379e-11	NA
ENSMUSG00000036611	306.179	-1.47691	0.206116	-7.16541	7.75556e-13	1.71379e-11	Eepd1
ENSMUSG00000028673	939.629	1.16372	0.162659	7.15436	8.40667e-13	1.85373e-11	Fuca1
ENSMUSG00000039629	1298.82	-1.10104	0.153934	-7.15265	8.51213e-13	1.87492e-11	Strip2
ENSMUSG00000052539	578.488	-1.02188	0.142872	-7.15239	8.52775e-13	1.87629e-11	Magi3
ENSMUSG00000006522	25.0922	3.72342	0.520742	7.15023	8.6631e-13	1.90189e-11	Itih3
ENSMUSG00000025092	226.463	-1.3036	0.182352	-7.14884	8.75161e-13	1.91921e-11	Hspa12a
ENSMUSG00000056366	246.3	-1.46176	0.204638	-7.14315	9.12131e-13	1.9981e-11	NA
ENSMUSG00000035711	132.195	1.97989	0.277341	7.13883	9.41267e-13	2.05742e-11	Dok3
ENSMUSG00000072694	102.37	1.90739	0.267646	7.12655	1.02913e-12	2.24212e-11	1500011B03Rik
ENSMUSG00000003934	780.217	-3.10442	0.435701	-7.12512	1.03988e-12	2.25816e-11	Efnb3
ENSMUSG00000002897	168.368	1.76888	0.24829	7.12425	1.04647e-12	2.27e-11	Il17ra
ENSMUSG00000030172	248.267	-1.44576	0.203034	-7.12078	1.07321e-12	2.32296e-11	Erc1
ENSMUSG00000058997	1735.9	-1.27456	0.179006	-7.12018	1.07788e-12	2.33055e-11	Vwa8
ENSMUSG00000025962	368.515	-1.00596	0.141525	-7.10799	1.17746e-12	2.53217e-11	Fastkd2
ENSMUSG00000030515	421.743	-1.1011	0.155004	-7.10368	1.21482e-12	2.6097e-11	Tars3
ENSMUSG00000030329	56.4153	2.05778	0.289701	7.10312	1.21975e-12	2.61749e-11	Pianp
ENSMUSG00000043004	237.244	1.33274	0.187825	7.09565	1.28743e-12	2.74797e-11	Gng2
ENSMUSG00000013089	498.867	1.20009	0.169316	7.08786	1.36206e-12	2.90271e-11	Etv5
ENSMUSG00000050640	48.3475	-2.6278	0.371262	-7.07801	1.46235e-12	3.10477e-11	Tmem150c
ENSMUSG00000035697	317.443	1.59585	0.225484	7.07742	1.46858e-12	3.1147e-11	Arhgap45
ENSMUSG00000047330	146.616	1.99458	0.282367	7.06379	1.62022e-12	3.41818e-11	Kcne4
ENSMUSG00000015342	81.5478	-1.80543	0.255672	-7.06151	1.64707e-12	3.47118e-11	Xk
ENSMUSG00000050821	320.838	-1.24593	0.176591	-7.05546	1.72032e-12	3.61791e-11	Fam131a
ENSMUSG00000018428	1781.48	-1.1515	0.163359	-7.04889	1.80346e-12	3.78084e-11	Akap1
ENSMUSG00000031827	591.702	1.23116	0.174713	7.04675	1.83143e-12	3.83545e-11	Cotl1
ENSMUSG00000028048	330.309	1.09681	0.155898	7.03546	1.98604e-12	4.13758e-11	Gba1
ENSMUSG00000021903	773.398	1.21085	0.172137	7.03423	2.0037e-12	4.17003e-11	Galnt15
ENSMUSG00000037406	145.267	2.17303	0.309136	7.02937	2.07471e-12	4.29103e-11	Htra4
ENSMUSG00000039497	246.665	1.02656	0.146127	7.02512	2.13884e-12	4.41909e-11	Dse
ENSMUSG00000054428	345.963	1.15175	0.163995	7.02308	2.17035e-12	4.47956e-11	Atp5if1
ENSMUSG00000026548	124.515	1.77986	0.253443	7.02271	2.17607e-12	4.48674e-11	Slamf9
ENSMUSG00000001918	962.119	1.60762	0.228941	7.02199	2.18733e-12	4.50532e-11	Slc1a5
ENSMUSG00000030096	2944.02	1.42555	0.203157	7.01697	2.26738e-12	4.6654e-11	Slc6a6
ENSMUSG00000056271	29.1178	3.86075	0.550487	7.01333	2.32715e-12	4.77854e-11	Lman1l
ENSMUSG00000032263	821.849	-1.10382	0.157664	-7.00108	2.53997e-12	5.20485e-11	Bckdhb
ENSMUSG00000059866	219.664	1.16282	0.166163	6.99808	2.59491e-12	5.30668e-11	Tnip2
ENSMUSG00000038451	95.907	1.76694	0.252489	6.99808	2.59497e-12	5.30668e-11	Spsb2
ENSMUSG00000050708	1227.45	1.20643	0.17263	6.98857	2.77709e-12	5.66753e-11	Ftl1
ENSMUSG00000022383	182.487	-1.89172	0.270742	-6.98716	2.80511e-12	5.71349e-11	Ppara
ENSMUSG00000028581	1081.91	1.43343	0.205201	6.98553	2.8378e-12	5.77376e-11	Laptm5
ENSMUSG00000039496	260.734	-1.2145	0.173896	-6.98407	2.86749e-12	5.82823e-11	Cdnf
ENSMUSG00000075702	1242.62	1.19684	0.171539	6.97705	3.01452e-12	6.12086e-11	Selenom
ENSMUSG00000041313	1066	-1.23975	0.17775	-6.97466	3.06619e-12	6.21946e-11	Slc7a1
ENSMUSG00000003429	881.741	1.01429	0.145457	6.97312	3.09992e-12	6.2815e-11	Rps11
ENSMUSG00000024222	991.165	3.06813	0.440109	6.9713	3.14034e-12	6.35696e-11	Fkbp5
ENSMUSG00000041132	66.5651	1.98723	0.285228	6.96718	3.2335e-12	6.53892e-11	N4bp2l1
ENSMUSG00000022651	36.2793	3.62847	0.520913	6.96561	3.26985e-12	6.60575e-11	Retnlg
ENSMUSG00000027698	2812.55	-1.10172	0.158192	-6.96445	3.29694e-12	6.64705e-11	Nceh1
ENSMUSG00000013275	888.705	-1.08145	0.155425	-6.95802	3.45087e-12	6.95038e-11	Slc41a1
ENSMUSG00000015134	98.0761	2.09098	0.300671	6.95438	3.5411e-12	7.12496e-11	Aldh1a3
ENSMUSG00000053063	151.78	2.66133	0.38289	6.95063	3.63669e-12	7.30992e-11	Clec12a
ENSMUSG00000086350	89.1522	-1.55968	0.224436	-6.94934	3.66989e-12	7.35467e-11	NA
ENSMUSG00000020882	294.308	1.53768	0.2213	6.94841	3.69432e-12	7.39604e-11	Cacnb1
ENSMUSG00000021751	32.4119	2.75509	0.396676	6.94544	3.77295e-12	7.54591e-11	Acox2
ENSMUSG00000027274	216.796	-1.24479	0.17935	-6.94053	3.9063e-12	7.8048e-11	Mkks
ENSMUSG00000038600	48.5363	3.44816	0.496903	6.9393	3.94053e-12	7.86532e-11	Atp6v0a4
ENSMUSG00000122950	29.6382	-2.59807	0.374597	-6.93563	4.04423e-12	8.06426e-11	NA
ENSMUSG00000097183	78.5601	2.20166	0.317476	6.93489	4.06532e-12	8.09018e-11	NA
ENSMUSG00000038204	1299.84	-1.25224	0.180854	-6.92403	4.38973e-12	8.70289e-11	Asb10
ENSMUSG00000025736	116.227	-1.23147	0.177853	-6.9241	4.3875e-12	8.70289e-11	Jmjd8
ENSMUSG00000035279	347.979	1.15201	0.166502	6.91889	4.55202e-12	9.00498e-11	Ssc5d
ENSMUSG00000057778	252.869	-1.3208	0.190965	-6.91643	4.6316e-12	9.14432e-11	Cyb5d2
ENSMUSG00000038271	294.574	1.25971	0.182149	6.91582	4.65166e-12	9.17488e-11	Iffo1
ENSMUSG00000031762	43.3013	4.33649	0.627143	6.91467	4.68945e-12	9.24029e-11	Mt2
ENSMUSG00000086596	49.9375	-2.10343	0.304213	-6.91433	4.70089e-12	9.25372e-11	Susd5
ENSMUSG00000019122	484.014	1.53809	0.222463	6.91394	4.71371e-12	9.26984e-11	Ccl9
ENSMUSG00000031342	586.107	1.19754	0.173216	6.91357	4.72594e-12	9.28475e-11	Gpm6b
ENSMUSG00000038046	221.899	-1.07986	0.156203	-6.91315	4.74012e-12	9.30347e-11	Mrm3
ENSMUSG00000052727	440.078	1.51708	0.219723	6.90451	5.03766e-12	9.86808e-11	Map1b
ENSMUSG00000048332	1437.57	1.14722	0.166238	6.90109	5.16042e-12	1.00987e-10	Lhfpl6
ENSMUSG00000035486	27.1767	-3.03311	0.440293	-6.88885	5.62444e-12	1.09852e-10	Plk5
ENSMUSG00000006731	63.4973	1.88622	0.27394	6.88552	5.75778e-12	1.12347e-10	B4galnt1
ENSMUSG00000087006	240.576	1.53302	0.222654	6.88518	5.77145e-12	1.12504e-10	Gm13889
ENSMUSG00000030214	524.638	-1.38461	0.201258	-6.87978	5.99437e-12	1.16736e-10	Plbd1
ENSMUSG00000031497	58.6488	1.84822	0.268656	6.87949	6.00681e-12	1.16864e-10	Tnfsf13b
ENSMUSG00000048387	142.097	1.6067	0.234041	6.86506	6.64621e-12	1.29178e-10	Osr1
ENSMUSG00000023915	209.012	-1.03334	0.150547	-6.86389	6.70105e-12	1.30118e-10	Tnfrsf21
ENSMUSG00000028017	67.7846	-1.71817	0.250345	-6.8632	6.73358e-12	1.30622e-10	Egf
ENSMUSG00000024127	785.258	-1.20054	0.174988	-6.86069	6.85271e-12	1.32676e-10	Prepl
ENSMUSG00000032010	1724.47	-1.19282	0.173976	-6.85623	7.07015e-12	1.36621e-10	Usp2
ENSMUSG00000031613	229.362	1.46838	0.214205	6.85504	7.12941e-12	1.37633e-10	Hpgd
ENSMUSG00000049892	148.795	1.23609	0.180351	6.85381	7.19084e-12	1.38685e-10	Rasd1
ENSMUSG00000039046	152.546	1.31929	0.192518	6.85283	7.24038e-12	1.39506e-10	Usp6nl
ENSMUSG00000067242	23.2453	-4.1488	0.605545	-6.85136	7.31524e-12	1.40813e-10	Lgi1
ENSMUSG00000042349	49.2006	2.52951	0.370048	6.83563	8.16474e-12	1.56863e-10	Ikbke
ENSMUSG00000073433	44.9778	2.90939	0.426	6.82956	8.51761e-12	1.63329e-10	Arhgdig
ENSMUSG00000018362	578.366	-1.40621	0.205954	-6.8278	8.6228e-12	1.6503e-10	Kpna2
ENSMUSG00000089812	26.655	2.92709	0.429217	6.81961	9.12886e-12	1.74381e-10	Gm15867
ENSMUSG00000076435	486.614	-1.25487	0.18426	-6.81035	9.73606e-12	1.85449e-10	Acsf2
ENSMUSG00000032224	90.8736	-1.67682	0.24643	-6.80446	1.0143e-11	1.92832e-10	Fam81a
ENSMUSG00000022129	83.5362	-1.65437	0.243577	-6.79198	1.10603e-11	2.09475e-10	Dct
ENSMUSG00000041012	156.785	-1.32996	0.195819	-6.7918	1.10739e-11	2.09511e-10	Cmtm8
ENSMUSG00000013707	86.6966	2.05436	0.302675	6.78732	1.14236e-11	2.15134e-10	Tnfaip8l2
ENSMUSG00000026600	180.312	1.23799	0.182438	6.7858	1.15444e-11	2.17001e-10	Soat1
ENSMUSG00000063160	254.819	1.34356	0.197994	6.78588	1.15379e-11	2.17001e-10	Numbl
ENSMUSG00000039069	399.405	-1.0486	0.154633	-6.78123	1.19161e-11	2.23357e-10	Mtg2
ENSMUSG00000049115	482.812	-1.08734	0.160342	-6.78136	1.19053e-11	2.23357e-10	Agtr1a
ENSMUSG00000010057	225.138	-1.02158	0.15079	-6.77485	1.24531e-11	2.33205e-10	Nprl2
ENSMUSG00000001930	2940.34	1.17309	0.173256	6.77085	1.28028e-11	2.39529e-10	Vwf
ENSMUSG00000100550	47.5195	-2.65252	0.391817	-6.76981	1.28951e-11	2.4103e-10	2310039L15Rik
ENSMUSG00000034206	67.7162	-2.38003	0.351641	-6.76835	1.3026e-11	2.4325e-10	Polq
ENSMUSG00000018537	162.197	1.12517	0.16634	6.76431	1.33948e-11	2.49671e-10	Pcgf2
ENSMUSG00000120249	41.1951	-2.65862	0.393067	-6.76377	1.34447e-11	2.50366e-10	NA
ENSMUSG00000074652	529.347	-1.96222	0.290412	-6.75667	1.41199e-11	2.62634e-10	Myh7b
ENSMUSG00000074622	514.634	1.01826	0.15079	6.75281	1.45013e-11	2.6904e-10	Mafb
ENSMUSG00000048120	543.851	1.17098	0.17344	6.75152	1.46309e-11	2.71193e-10	Entpd1
ENSMUSG00000020057	153.312	1.22567	0.181584	6.74989	1.47956e-11	2.73993e-10	Dram1
ENSMUSG00000050234	318.683	1.58022	0.234191	6.74754	1.50369e-11	2.77946e-10	Gja4
ENSMUSG00000001506	6735.55	1.34999	0.200202	6.74312	1.55016e-11	2.86008e-10	Col1a1
ENSMUSG00000037032	2052.64	-1.18471	0.175762	-6.74042	1.57934e-11	2.91122e-10	Apbb1
ENSMUSG00000038843	104.243	1.53025	0.227258	6.73354	1.65586e-11	3.03827e-10	Gcnt1
ENSMUSG00000031904	219.444	1.20056	0.178394	6.72981	1.69886e-11	3.11146e-10	Slc7a6
ENSMUSG00000024440	203.162	-2.23384	0.33196	-6.72925	1.70542e-11	3.12063e-10	Pcdh12
ENSMUSG00000039518	32.0423	2.89204	0.429944	6.72656	1.73724e-11	3.17304e-10	Cdsn
ENSMUSG00000041481	29.0944	3.95544	0.588854	6.7172	1.85256e-11	3.37749e-10	Serpina3g
ENSMUSG00000026610	419.766	-1.0406	0.154947	-6.71583	1.87002e-11	3.40623e-10	Esrrg
ENSMUSG00000030790	240.847	1.47898	0.220241	6.71529	1.87693e-11	3.4157e-10	Adm
ENSMUSG00000037868	84.4254	2.31851	0.345424	6.71206	1.91898e-11	3.48627e-10	Egr2
ENSMUSG00000048779	227.732	1.20143	0.179194	6.70462	2.01938e-11	3.66161e-10	P2ry6
ENSMUSG00000074577	55.6125	2.21661	0.330743	6.70191	2.05715e-11	3.72673e-10	Ripor3
ENSMUSG00000091572	24.7911	5.48793	0.819215	6.69901	2.0984e-11	3.78772e-10	Vmn2r3
ENSMUSG00000057914	773.484	-1.283	0.191553	-6.69791	2.11421e-11	3.81152e-10	Cacnb2
ENSMUSG00000022246	162.343	1.36807	0.204255	6.69783	2.11539e-11	3.81152e-10	Rai14
ENSMUSG00000037686	37.1008	4.10719	0.61356	6.69404	2.17094e-11	3.90809e-10	Aspg
ENSMUSG00000037145	76.8687	-2.52487	0.377334	-6.69135	2.21127e-11	3.9771e-10	Lypd8l
ENSMUSG00000028527	463.582	-1.26105	0.188528	-6.68895	2.24771e-11	4.03901e-10	Ak4
ENSMUSG00000029919	73.2845	2.45153	0.367039	6.67921	2.40226e-11	4.30898e-10	Hpgds
ENSMUSG00000003352	167.032	1.04169	0.156013	6.67692	2.44017e-11	4.37307e-10	Cacnb3
ENSMUSG00000041926	322.699	-1.03817	0.155504	-6.67616	2.4529e-11	4.39195e-10	Rnpep
ENSMUSG00000031340	72.9424	2.22935	0.334017	6.67435	2.48326e-11	4.43505e-10	Gabre
ENSMUSG00000019838	311.424	-1.14559	0.171676	-6.67301	2.50615e-11	4.47127e-10	Slc16a10
ENSMUSG00000054958	51.5805	-2.6682	0.400082	-6.66914	2.5731e-11	4.58254e-10	Nt5c1a
ENSMUSG00000027318	90.2581	1.82888	0.274288	6.66773	2.59797e-11	4.62272e-10	Adam33
ENSMUSG00000042759	42.6965	2.14695	0.322402	6.65924	2.75238e-11	4.88877e-10	Apobr
ENSMUSG00000134796	147.049	2.06553	0.310271	6.65718	2.79128e-11	4.9447e-10	NA
ENSMUSG00000015027	158.628	1.20648	0.18125	6.65649	2.80453e-11	4.96377e-10	Galns
ENSMUSG00000045658	279.111	1.05369	0.158387	6.65265	2.87867e-11	5.09048e-10	Pid1
ENSMUSG00000021273	675.225	-1.04724	0.157543	-6.64732	2.98478e-11	5.2688e-10	Fdft1
ENSMUSG00000030972	29.934	-3.08032	0.463611	-6.6442	3.04876e-11	5.37226e-10	Acsm5
ENSMUSG00000104960	101.109	1.59886	0.24066	6.64364	3.06028e-11	5.38781e-10	NA
ENSMUSG00000000838	275.297	1.00754	0.151756	6.63917	3.15458e-11	5.5392e-10	Fmr1
ENSMUSG00000095041	641.654	1.38286	0.208383	6.63613	3.22018e-11	5.64944e-10	NA
ENSMUSG00000048677	109.101	1.45177	0.218826	6.63438	3.2588e-11	5.71218e-10	Tpcn2
ENSMUSG00000109052	31.4234	-3.05598	0.460719	-6.63306	3.2879e-11	5.75815e-10	NA
ENSMUSG00000040952	4905.85	1.03169	0.155581	6.63122	3.32919e-11	5.82027e-10	Rps19
ENSMUSG00002075807	27.6578	3.12604	0.471411	6.63124	3.32883e-11	5.82027e-10	NA
ENSMUSG00000024480	373.947	1.01308	0.152781	6.63095	3.33543e-11	5.82608e-10	Ap3s1
ENSMUSG00000004610	216.857	-1.13869	0.171769	-6.62919	3.37527e-11	5.88959e-10	Etfb
ENSMUSG00000023885	726.383	1.17324	0.176991	6.6288	3.38437e-11	5.89612e-10	Thbs2
ENSMUSG00000039960	221.882	1.20788	0.182222	6.62864	3.38801e-11	5.89732e-10	Rhou
ENSMUSG00000021186	1417.51	1.01562	0.153384	6.62143	3.55749e-11	6.18695e-10	Fbln5
ENSMUSG00000007783	84.9506	1.52078	0.229737	6.61964	3.60085e-11	6.25691e-10	Cpt1c
ENSMUSG00000120691	29.1346	-2.86652	0.433555	-6.61166	3.80043e-11	6.59225e-10	NA
ENSMUSG00000039652	833.927	-1.11881	0.169356	-6.60629	3.94083e-11	6.81215e-10	Cpeb3
ENSMUSG00000022947	95.2141	1.45498	0.220283	6.60507	3.97334e-11	6.8565e-10	Cbr3
ENSMUSG00000040430	842.691	-1.10452	0.167259	-6.60364	4.01179e-11	6.91687e-10	Pitpnc1
ENSMUSG00000020067	1653.24	-1.06653	0.161515	-6.60328	4.02149e-11	6.92764e-10	Mypn
ENSMUSG00000037887	684.845	-1.12604	0.170593	-6.60073	4.09139e-11	7.04198e-10	Dusp8
ENSMUSG00000076441	203.01	1.10587	0.167692	6.59463	4.26309e-11	7.33119e-10	Ass1
ENSMUSG00000028414	279.603	-1.19053	0.180569	-6.59321	4.30423e-11	7.39559e-10	Fktn
ENSMUSG00000095304	1588.93	1.61715	0.245413	6.58951	4.41267e-11	7.5689e-10	Plac9
ENSMUSG00000038764	647.46	-1.2374	0.187801	-6.58888	4.43159e-11	7.59484e-10	Ptpn3
ENSMUSG00000028626	30.124	3.05148	0.463183	6.58806	4.45609e-11	7.62166e-10	Col9a2
ENSMUSG00000020629	697.33	-1.02277	0.155249	-6.58797	4.45867e-11	7.62166e-10	Adi1
ENSMUSG00000034401	169.378	1.13125	0.171926	6.57986	4.70888e-11	8.0015e-10	Spata6
ENSMUSG00000085408	27.4743	-2.5627	0.389603	-6.57772	4.77712e-11	8.10368e-10	C530005A16Rik
ENSMUSG00000033624	352.524	-1.4647	0.22273	-6.57614	4.82831e-11	8.18357e-10	Pdpr
ENSMUSG00000070509	716.511	-1.20074	0.183098	-6.55793	5.45607e-11	9.20855e-10	Rgma
ENSMUSG00000117696	186.563	-1.4257	0.217433	-6.55694	5.49243e-11	9.25431e-10	NA
ENSMUSG00000035004	62.4221	1.85906	0.28359	6.55545	5.54761e-11	9.33941e-10	Igsf6
ENSMUSG00000039376	5682.38	1.36428	0.208217	6.55217	5.67065e-11	9.5305e-10	Synpo2l
ENSMUSG00000026308	1010.01	-1.22201	0.18655	-6.55056	5.73215e-11	9.62578e-10	Klhl30
ENSMUSG00000034652	81.293	1.51314	0.231152	6.54608	5.90682e-11	9.90247e-10	Cd300a
ENSMUSG00000006641	211.38	-1.32131	0.201925	-6.5436	6.00562e-11	1.00512e-09	Slc5a6
ENSMUSG00000051890	335.703	-1.21157	0.185279	-6.53915	6.18684e-11	1.03372e-09	Klhdc1
ENSMUSG00000046027	157.021	1.11874	0.171109	6.53815	6.22833e-11	1.03892e-09	Stard5
ENSMUSG00000038967	7262.31	-1.09058	0.166885	-6.53492	6.36441e-11	1.05985e-09	Pdk2
ENSMUSG00000037826	736.887	-1.48207	0.226831	-6.53377	6.41324e-11	1.06621e-09	Ppm1k
ENSMUSG00000007097	8182.26	-1.44013	0.220427	-6.53336	6.43119e-11	1.0683e-09	Atp1a2
ENSMUSG00000022901	94.7138	1.63873	0.250902	6.53134	6.51824e-11	1.08097e-09	Cd86
ENSMUSG00000041949	153.698	-1.25217	0.191728	-6.53097	6.53451e-11	1.08277e-09	Tango6
ENSMUSG00000049872	148.548	1.58097	0.242862	6.50978	7.52632e-11	1.24094e-09	Calhm5
ENSMUSG00000039414	449.784	-1.27933	0.196579	-6.50797	7.6175e-11	1.25494e-09	Heatr5b
ENSMUSG00000005373	275.094	-1.53813	0.236511	-6.50341	7.85171e-11	1.29246e-09	Mlxipl
ENSMUSG00000026114	22.9108	-3.10961	0.478191	-6.50287	7.88029e-11	1.2961e-09	Cnga3
ENSMUSG00000055900	168.41	-1.07348	0.165135	-6.50066	7.99689e-11	1.3142e-09	Tmem69
ENSMUSG00000007682	245.301	3.13573	0.482438	6.49976	8.04475e-11	1.32098e-09	Dio2
ENSMUSG00000100131	174.622	-1.21633	0.187316	-6.49348	8.38739e-11	1.37498e-09	NA
ENSMUSG00000070583	74.914	-2.60045	0.400685	-6.49002	8.58269e-11	1.40585e-09	Fv1
ENSMUSG00000032523	1973.62	-1.23121	0.189991	-6.48034	9.15154e-11	1.49535e-09	Hhatl
ENSMUSG00000014503	230.439	-1.51927	0.234791	-6.47074	9.75256e-11	1.58836e-09	Pkd2l2
ENSMUSG00000034825	27.7121	4.63105	0.71654	6.46307	1.02601e-10	1.6656e-09	Nrip3
ENSMUSG00000005447	87.715	1.63902	0.253797	6.45797	1.06115e-10	1.72125e-09	Pafah1b3
ENSMUSG00000073608	38.0464	-2.81812	0.436575	-6.45506	1.08175e-10	1.75183e-09	Gal3st2c
ENSMUSG00000109635	390.401	-1.57025	0.243272	-6.45468	1.08445e-10	1.75478e-09	NA
ENSMUSG00000101389	61.0544	2.77394	0.430019	6.45073	1.11314e-10	1.79829e-09	Ms4a4a
ENSMUSG00000024696	62.33	1.98707	0.308035	6.45077	1.11283e-10	1.79829e-09	Lpxn
ENSMUSG00000053716	888.829	-1.05256	0.163199	-6.44953	1.12201e-10	1.81115e-09	Dusp7
ENSMUSG00000023092	6188.14	1.53223	0.237616	6.44833	1.1309e-10	1.82256e-09	Fhl1
ENSMUSG00000026480	165.564	1.2808	0.198719	6.44531	1.15365e-10	1.85623e-09	Ncf2
ENSMUSG00000041959	1164.04	1.20277	0.186664	6.44351	1.16739e-10	1.87533e-09	S100a10
ENSMUSG00000025900	70.4017	-2.12181	0.329362	-6.44218	1.17773e-10	1.89042e-09	Rp1
ENSMUSG00000002274	188.997	-1.21518	0.18876	-6.4377	1.21299e-10	1.94389e-09	Metrn
ENSMUSG00000019832	97.9056	1.75829	0.273164	6.43677	1.22043e-10	1.95425e-09	Rab32
ENSMUSG00000047798	33.4487	6.34143	0.985884	6.43223	1.25749e-10	2.01198e-09	Cd300lf
ENSMUSG00000049037	126.125	1.87309	0.29125	6.43121	1.26592e-10	2.02386e-09	Clec4a1
ENSMUSG00000040618	419.3	1.10459	0.171764	6.43086	1.26885e-10	2.02692e-09	Pck2
ENSMUSG00000025212	415.17	1.11839	0.174018	6.42687	1.30256e-10	2.07911e-09	Sfxn3
ENSMUSG00000142530	17.7974	-4.21844	0.6565	-6.42565	1.31305e-10	2.09208e-09	NA
ENSMUSG00000074677	23.4278	4.5688	0.711035	6.42556	1.31383e-10	2.09208e-09	Sirpb1c
ENSMUSG00000100410	20.1541	-4.0698	0.635524	-6.40385	1.51504e-10	2.39912e-09	2310020H05Rik
ENSMUSG00000086503	1220.67	1.11603	0.174359	6.40076	1.54607e-10	2.44052e-09	Xist
ENSMUSG00000038181	183.397	1.72445	0.269405	6.40097	1.54396e-10	2.44052e-09	Chpf2
ENSMUSG00000033871	126.792	-1.56818	0.244996	-6.40083	1.54532e-10	2.44052e-09	Ppargc1b
ENSMUSG00000035933	356.074	-1.14092	0.178391	-6.39561	1.59904e-10	2.52215e-09	Cog5
ENSMUSG00000023972	176.563	1.12387	0.175829	6.39182	1.63925e-10	2.57947e-09	Ptk7
ENSMUSG00000026204	224.739	1.34513	0.210615	6.38668	1.69528e-10	2.66203e-09	Ptprn
ENSMUSG00000115180	19.5559	-3.49776	0.547824	-6.38482	1.71594e-10	2.68956e-09	Gm30556
ENSMUSG00000033105	64.6781	1.57333	0.246568	6.38092	1.76023e-10	2.75683e-09	Lss
ENSMUSG00000033192	66.733	1.75478	0.275145	6.37766	1.79815e-10	2.80741e-09	Lpcat2
ENSMUSG00000029673	307.252	-1.11114	0.174425	-6.37029	1.88674e-10	2.93884e-09	Auts2
ENSMUSG00000047909	209.926	1.08903	0.171129	6.3638	1.96819e-10	3.06095e-09	Ankrd16
ENSMUSG00000040612	78.0495	2.00414	0.315132	6.35968	2.0217e-10	3.13685e-09	Ildr2
ENSMUSG00000020747	1509.86	-1.41945	0.223239	-6.35842	2.03845e-10	3.16039e-09	Tmem94
ENSMUSG00000097644	30.9553	-2.61881	0.411937	-6.35731	2.05318e-10	3.1783e-09	NA
ENSMUSG00000029186	72.9512	1.66418	0.26184	6.3557	2.07484e-10	3.20934e-09	Pi4k2b
ENSMUSG00000031380	113.674	1.54451	0.243102	6.35336	2.10664e-10	3.25351e-09	Vegfd
ENSMUSG00000058624	396.682	1.43867	0.226454	6.35306	2.11077e-10	3.25736e-09	Gda
ENSMUSG00000029769	79.633	1.88716	0.297146	6.35093	2.14021e-10	3.29011e-09	Ccdc136
ENSMUSG00000034591	89.8033	1.9373	0.305137	6.34896	2.1677e-10	3.3298e-09	Slc41a2
ENSMUSG00000120208	215.65	-3.51585	0.553888	-6.34757	2.18736e-10	3.35485e-09	NA
ENSMUSG00000029161	58.7927	2.49632	0.393595	6.34237	2.26262e-10	3.46761e-09	Cgref1
ENSMUSG00000101968	85.3547	-1.44491	0.227979	-6.3379	2.32923e-10	3.56424e-09	Teshl
ENSMUSG00000049130	260.528	1.39596	0.220324	6.33595	2.35882e-10	3.60401e-09	C5ar1
ENSMUSG00000001604	1406.45	-1.03311	0.163099	-6.33429	2.38436e-10	3.63747e-09	Tcea3
ENSMUSG00000100599	112.404	1.26301	0.199436	6.3329	2.40594e-10	3.66759e-09	1700120C14Rik
ENSMUSG00000030110	82.7915	-2.07116	0.327811	-6.31817	2.64686e-10	4.02258e-09	Ret
ENSMUSG00000031659	447.02	1.0945	0.173238	6.31787	2.65195e-10	4.02726e-09	Adcy7
ENSMUSG00000032271	147.554	1.79441	0.284066	6.31686	2.6693e-10	4.05053e-09	Nnmt
ENSMUSG00000045382	159.775	1.57687	0.249734	6.31419	2.71572e-10	4.11785e-09	Cxcr4
ENSMUSG00000046345	86.0354	-1.90407	0.301714	-6.31086	2.77493e-10	4.20126e-09	Smco1
ENSMUSG00000072941	2206	1.02719	0.163048	6.29995	2.97733e-10	4.4907e-09	Sod3
ENSMUSG00000024592	220.214	-1.08845	0.172838	-6.29751	3.02466e-10	4.55864e-09	C330018D20Rik
ENSMUSG00000028634	140.087	1.03413	0.164317	6.29349	3.10408e-10	4.67131e-09	Hivep3
ENSMUSG00000074183	37.6986	2.91011	0.462439	6.29296	3.11471e-10	4.68378e-09	Gsta1
ENSMUSG00000004043	361.542	-1.20357	0.191393	-6.28847	3.20617e-10	4.80685e-09	Stat5a
ENSMUSG00000046312	213.85	-1.37486	0.21868	-6.2871	3.23461e-10	4.84224e-09	Myorg
ENSMUSG00000113975	48.6248	-1.91912	0.305711	-6.27755	3.43953e-10	5.13363e-09	Gm36372
ENSMUSG00000022508	159.267	-1.03523	0.165038	-6.2727	3.54844e-10	5.28435e-09	Bcl6
ENSMUSG00000030748	646.148	1.61732	0.258228	6.26315	3.77271e-10	5.60164e-09	Il4ra
ENSMUSG00000021994	171.252	-1.12381	0.179441	-6.26287	3.77954e-10	5.60763e-09	Wnt5a
ENSMUSG00000025017	119.141	1.6175	0.258603	6.25477	3.98113e-10	5.88054e-09	Pik3ap1
ENSMUSG00000019997	8126.71	2.8247	0.452529	6.24204	4.31903e-10	6.37025e-09	Ccn2
ENSMUSG00000084349	61.8154	1.65882	0.265996	6.23626	4.48146e-10	6.59038e-09	Rpl3-ps1
ENSMUSG00000025271	87.8288	-1.9926	0.319613	-6.23442	4.53447e-10	6.65366e-09	Pfkfb1
ENSMUSG00000064109	24.704	2.7992	0.449093	6.233	4.57574e-10	6.7093e-09	Hcst
ENSMUSG00000071042	285.767	-1.21393	0.194828	-6.23077	4.64158e-10	6.79587e-09	Rasgrp3
ENSMUSG00000120224	174.924	1.30574	0.2096	6.22966	4.6744e-10	6.83892e-09	NA
ENSMUSG00000002265	286.565	1.40537	0.225926	6.22048	4.95633e-10	7.23028e-09	Peg3
ENSMUSG00000025372	218.558	1.19362	0.191885	6.22048	4.95636e-10	7.23028e-09	Baiap2
ENSMUSG00000064367	141740	-1.13282	0.182152	-6.21909	5.0005e-10	7.28935e-09	mt-Nd5
ENSMUSG00000026885	118.791	1.43176	0.230538	6.2105	5.28149e-10	7.67101e-09	Ttll11
ENSMUSG00000021322	65.2283	1.90209	0.306424	6.20737	5.38794e-10	7.81994e-09	Aoah
ENSMUSG00000128526	72.0719	-1.39087	0.224196	-6.2038	5.51146e-10	7.99342e-09	NA
ENSMUSG00000048731	63.8389	-1.81398	0.292417	-6.20338	5.5262e-10	8.00898e-09	Ggnbp1
ENSMUSG00000061535	298.085	1.77848	0.286983	6.19715	5.74939e-10	8.32641e-09	C1qtnf7
ENSMUSG00000035914	184.226	1.09116	0.176098	6.19634	5.77917e-10	8.36349e-09	Cd276
ENSMUSG00000026893	171.551	-1.05716	0.170778	-6.19028	6.00585e-10	8.66645e-09	Gca
ENSMUSG00000026728	7699.51	1.03198	0.166724	6.18977	6.02539e-10	8.68837e-09	Vim
ENSMUSG00000079419	60.9779	1.91772	0.310611	6.17403	6.65725e-10	9.57878e-09	Ms4a6c
ENSMUSG00000027907	1138.15	1.22628	0.198669	6.1725	6.72191e-10	9.65792e-09	S100a11
ENSMUSG00000026709	215.088	-1.05539	0.171224	-6.1638	7.10215e-10	1.0175e-08	Dars2
ENSMUSG00000040809	111.37	6.66849	1.08226	6.16163	7.19977e-10	1.03075e-08	Chil3
ENSMUSG00000036632	326.767	1.14253	0.185448	6.16092	7.23229e-10	1.03466e-08	Alg5
ENSMUSG00000032802	638.34	1.13328	0.18407	6.15676	7.42493e-10	1.06146e-08	Srxn1
ENSMUSG00000070047	571.724	1.0216	0.166115	6.14994	7.75113e-10	1.10573e-08	Fat1
ENSMUSG00000024965	177.161	1.18577	0.192899	6.14713	7.88998e-10	1.12473e-08	Fermt3
ENSMUSG00000013921	233.034	1.10432	0.17972	6.1447	8.01129e-10	1.14121e-08	Clip3
ENSMUSG00000029469	147.329	-1.01136	0.164747	-6.13884	8.31278e-10	1.18163e-08	Ift81
ENSMUSG00000028329	132.18	1.12508	0.183419	6.13392	8.57388e-10	1.21702e-08	Xpa
ENSMUSG00000024210	140.687	-1.27465	0.207963	-6.1292	8.83209e-10	1.251e-08	Ip6k3
ENSMUSG00000050919	188	-1.36519	0.222761	-6.12851	8.87086e-10	1.25561e-08	Zfp366
ENSMUSG00000125700	35.6275	-2.7477	0.44844	-6.12724	8.94184e-10	1.26208e-08	Gm35228
ENSMUSG00000025938	131.254	-1.44396	0.236222	-6.11274	9.79362e-10	1.37841e-08	Slco5a1
ENSMUSG00000029869	78.5542	1.5377	0.251651	6.11047	9.93393e-10	1.3962e-08	Ephb6
ENSMUSG00000024525	270.485	-1.58089	0.258808	-6.10835	1.00664e-09	1.41283e-08	Impa2
ENSMUSG00000027298	107.291	1.18825	0.194578	6.10682	1.01638e-09	1.4235e-08	Tyro3
ENSMUSG00000087651	86.4784	1.41917	0.232481	6.10447	1.03139e-09	1.44352e-08	1500009L16Rik
ENSMUSG00000031574	116.806	1.82523	0.29927	6.09893	1.0678e-09	1.49239e-08	Star
ENSMUSG00000135097	21.4948	-4.01112	0.658775	-6.08875	1.13796e-09	1.586e-08	NA
ENSMUSG00000021898	1100.86	-1.41138	0.231798	-6.08884	1.13735e-09	1.586e-08	Asb14
ENSMUSG00000003476	323.639	-1.36818	0.224985	-6.08121	1.19276e-09	1.65777e-08	Crhr2
ENSMUSG00000121484	20.6229	4.16844	0.685656	6.0795	1.20556e-09	1.67323e-08	Serpina3h
ENSMUSG00000020399	32.8562	2.22392	0.365868	6.07849	1.2132e-09	1.68267e-08	Havcr2
ENSMUSG00000072676	368.977	1.44257	0.237373	6.07723	1.22273e-09	1.6947e-08	Tmem254
ENSMUSG00000025314	206.971	1.17392	0.19323	6.07526	1.2379e-09	1.71217e-08	Ptprj
ENSMUSG00000027994	86.0157	1.37441	0.226434	6.06984	1.28041e-09	1.76852e-08	Mcub
ENSMUSG00000012819	54.4579	-2.35893	0.389168	-6.06146	1.34889e-09	1.85543e-08	Cdh23
ENSMUSG00000050947	397.613	-1.07994	0.178202	-6.06021	1.3594e-09	1.86859e-08	Amigo1
ENSMUSG00000052688	150.281	1.20091	0.198209	6.05882	1.37125e-09	1.88358e-08	Rab7b
ENSMUSG00000020262	650.353	1.31895	0.21783	6.05497	1.40441e-09	1.92781e-08	Adarb1
ENSMUSG00000030772	5001.92	1.14369	0.188895	6.0546	1.40763e-09	1.93091e-08	Dkk3
ENSMUSG00000018001	1256.68	1.03812	0.171579	6.05038	1.44505e-09	1.97952e-08	Cyth3
ENSMUSG00000074476	42.7093	-1.93169	0.319668	-6.04281	1.5145e-09	2.07041e-08	Spc24
ENSMUSG00000010492	15.6598	-3.83372	0.63462	-6.04097	1.53194e-09	2.09281e-08	Uckl1os
ENSMUSG00000070780	29.8985	2.40958	0.399102	6.03751	1.56512e-09	2.12942e-08	Rbm47
ENSMUSG00000041782	200.138	1.06069	0.17582	6.03283	1.61109e-09	2.19047e-08	Lad1
ENSMUSG00000004266	151.832	1.58543	0.262948	6.02942	1.64553e-09	2.23274e-08	Ptpn6
ENSMUSG00000026288	263.019	1.09726	0.182278	6.01972	1.74718e-09	2.36585e-08	Inpp5d
ENSMUSG00000035944	283.057	-1.01036	0.16784	-6.01977	1.74661e-09	2.36585e-08	Ttc38
ENSMUSG00000078566	1365.34	1.33458	0.221736	6.01879	1.75724e-09	2.37626e-08	Bnip3
ENSMUSG00000068246	37.1223	2.81844	0.468267	6.01888	1.75623e-09	2.37626e-08	Apol9b
ENSMUSG00000032089	165.071	1.84322	0.306256	6.01854	1.75993e-09	2.37828e-08	Il10ra
ENSMUSG00000111709	25.4435	3.00171	0.499046	6.01489	1.80008e-09	2.4309e-08	Gsta13
ENSMUSG00000027086	278.7	-1.30412	0.216917	-6.01206	1.83182e-09	2.47043e-08	Fastkd1
ENSMUSG00000000957	542.522	1.51304	0.251773	6.00954	1.86046e-09	2.50736e-08	Mmp14
ENSMUSG00000092397	217.879	-1.44366	0.240274	-6.0084	1.87363e-09	2.5234e-08	Actc1dt
ENSMUSG00000045639	333.445	-1.00265	0.167021	-6.00314	1.93536e-09	2.60253e-08	Zfp629
ENSMUSG00000024885	76.3806	2.02606	0.337505	6.00306	1.93628e-09	2.60253e-08	Aldh3b1
ENSMUSG00000030030	25.61	-2.53729	0.42271	-6.00244	1.94378e-09	2.61085e-08	1700003E16Rik
ENSMUSG00000052353	19.968	6.91495	1.15234	6.00079	1.96358e-09	2.63568e-08	Cemip
ENSMUSG00000024617	621.26	-1.5197	0.253337	-5.99873	1.98864e-09	2.66395e-08	Camk2a
ENSMUSG00000026749	166.18	1.56889	0.261666	5.99579	2.02497e-09	2.70899e-08	Nek6
ENSMUSG00000073490	238.985	1.629	0.271703	5.99551	2.02851e-09	2.71191e-08	Ifi207
ENSMUSG00000002763	1023.82	-1.24833	0.20826	-5.9941	2.04614e-09	2.73366e-08	Pex6
ENSMUSG00000040364	20.8454	3.85282	0.643636	5.98601	2.15045e-09	2.86917e-08	Sec1
ENSMUSG00000043795	141.518	-1.69801	0.283748	-5.98421	2.17447e-09	2.89929e-08	Prr33
ENSMUSG00000073489	183.148	1.83591	0.306981	5.98055	2.22387e-09	2.96319e-08	Ifi204
ENSMUSG00000078815	24.8126	-3.41185	0.57062	-5.97921	2.24228e-09	2.98573e-08	Cacng6
ENSMUSG00000014602	110.577	1.38185	0.231273	5.97498	2.3012e-09	3.06215e-08	Kif1a
ENSMUSG00000060636	2802.34	1.02409	0.171513	5.97091	2.3594e-09	3.1375e-08	Rpl35a
ENSMUSG00000044676	119.447	-1.49711	0.251005	-5.96445	2.45452e-09	3.25749e-08	Zfp612
ENSMUSG00000013584	229.226	1.20782	0.202837	5.95465	2.60623e-09	3.44284e-08	Aldh1a2
ENSMUSG00000021256	82.3885	-1.59388	0.267874	-5.95011	2.67955e-09	3.53735e-08	Vash1
ENSMUSG00000078190	45.8907	2.37123	0.399117	5.9412	2.82951e-09	3.72795e-08	Dnm3os
ENSMUSG00000037990	47.163	1.76979	0.297895	5.94098	2.83318e-09	3.73032e-08	Sh3rf3
ENSMUSG00000036819	134.486	-1.16085	0.195481	-5.93842	2.87783e-09	3.78164e-08	Jmjd4
ENSMUSG00000049103	94.2455	2.12094	0.357549	5.9319	2.99455e-09	3.92214e-08	Ccr2
ENSMUSG00000138311	43.7936	-2.52103	0.425079	-5.93074	3.0158e-09	3.94738e-08	NA
ENSMUSG00000028238	20.4223	4.36982	0.737767	5.92303	3.16058e-09	4.12878e-08	Atp6v0d2
ENSMUSG00000045534	350.248	-1.31603	0.222307	-5.91988	3.22176e-09	4.2056e-08	Kcna5
ENSMUSG00000031618	244.679	-1.43486	0.242384	-5.91979	3.22359e-09	4.2056e-08	Nr3c2
ENSMUSG00000121059	125.946	1.28333	0.217027	5.91321	3.35499e-09	4.37417e-08	NA
ENSMUSG00000046814	60.5471	-2.18989	0.370361	-5.91287	3.36199e-09	4.38045e-08	Gchfr
ENSMUSG00000020614	157.213	1.09943	0.185991	5.9112	3.39619e-09	4.42212e-08	Fam20a
ENSMUSG00000031838	197.023	1.34319	0.227449	5.90544	3.51699e-09	4.56752e-08	Ifi30
ENSMUSG00000027995	161.469	1.21	0.205021	5.90184	3.59476e-09	4.65944e-08	Tlr2
ENSMUSG00000020604	70.5348	1.63386	0.27697	5.89905	3.65609e-09	4.73587e-08	Arsg
ENSMUSG00000121790	23.3789	-2.73443	0.463886	-5.89463	3.75532e-09	4.85183e-08	2310069G16Rik
ENSMUSG00000002233	1242.59	1.20478	0.204573	5.88923	3.88001e-09	5.00324e-08	Rhoc
ENSMUSG00000123116	40.9753	2.48678	0.42229	5.8888	3.89009e-09	5.013e-08	NA
ENSMUSG00000014361	171.229	1.00192	0.170166	5.8879	3.91128e-09	5.03706e-08	Mertk
ENSMUSG00000010362	632.208	-1.21541	0.206563	-5.88394	4.00602e-09	5.14621e-08	Rdm1
ENSMUSG00000022792	366.015	-1.05106	0.178632	-5.88393	4.00633e-09	5.14621e-08	Yars2
ENSMUSG00000042734	80.5931	1.91917	0.326184	5.88372	4.01158e-09	5.14965e-08	Ttc9
ENSMUSG00000045411	262.079	1.06695	0.181405	5.88156	4.06406e-09	5.21367e-08	2410002F23Rik
ENSMUSG00000036242	247.149	-1.32527	0.225443	-5.87851	4.13974e-09	5.30396e-08	Armh4
ENSMUSG00000047420	42.9894	2.18365	0.37161	5.87619	4.19828e-09	5.37552e-08	Fam180a
ENSMUSG00000116946	55.9921	1.7587	0.299566	5.87081	4.33671e-09	5.54566e-08	NA
ENSMUSG00000037994	17.5593	4.63775	0.790088	5.86991	4.36022e-09	5.57216e-08	Slc9b2
ENSMUSG00000021537	419.806	1.00929	0.172107	5.86431	4.50994e-09	5.75247e-08	Cetn3
ENSMUSG00000021702	1137.82	3.10656	0.529766	5.86402	4.518e-09	5.75542e-08	Thbs4
ENSMUSG00000051435	19.9588	3.49391	0.595924	5.86302	4.54531e-09	5.77917e-08	Fhad1
ENSMUSG00000025902	450.115	1.02571	0.175078	5.85861	4.66759e-09	5.9271e-08	Sox17
ENSMUSG00000031490	563.866	1.30175	0.222442	5.8521	4.8539e-09	6.14418e-08	Eif4ebp1
ENSMUSG00000021486	1089.22	1.06064	0.181322	5.84949	4.93069e-09	6.23349e-08	Prelid1
ENSMUSG00000032024	104.659	1.35269	0.231297	5.84826	4.96732e-09	6.27583e-08	Clmp
ENSMUSG00000000739	34.4097	2.56181	0.438281	5.84513	5.06175e-09	6.3911e-08	Sult5a1
ENSMUSG00000005124	119.562	1.62941	0.279088	5.83834	5.2723e-09	6.64018e-08	Ccn4
ENSMUSG00000047407	117.648	1.28345	0.219918	5.83607	5.34469e-09	6.72288e-08	Tgif1
ENSMUSG00000047485	84.0802	-1.32876	0.227695	-5.83572	5.35602e-09	6.7329e-08	Klhl34
ENSMUSG00000024299	698.739	1.15572	0.198081	5.83459	5.39243e-09	6.77441e-08	Adamts10
ENSMUSG00000042246	96.6749	-1.51738	0.260124	-5.83331	5.434e-09	6.82235e-08	Tmc7
ENSMUSG00000070577	208.202	-1.10483	0.189427	-5.83249	5.46053e-09	6.85136e-08	Ciroz
ENSMUSG00000024645	421.655	-1.0187	0.174848	-5.82621	5.67003e-09	7.10085e-08	Timm21
ENSMUSG00000028621	186.302	-1.55179	0.266431	-5.82439	5.73228e-09	7.17431e-08	Cyb5rl
ENSMUSG00000039109	1003.67	1.09913	0.188749	5.82322	5.7724e-09	7.22001e-08	F13a1
ENSMUSG00000053317	283.07	1.17536	0.2022	5.81286	6.14136e-09	7.6767e-08	Sec61b
ENSMUSG00000024186	17.0956	3.54472	0.610449	5.80674	6.36997e-09	7.94756e-08	Rgs11
ENSMUSG00000049690	54.6502	-1.46199	0.251895	-5.80396	6.47683e-09	8.07081e-08	Nckap5
ENSMUSG00000058952	19.8805	4.12667	0.711334	5.80131	6.57976e-09	8.19398e-08	Cfi
ENSMUSG00000036181	4001.87	1.13912	0.196512	5.79667	6.76453e-09	8.4136e-08	H1f2
ENSMUSG00000045104	51.3195	-1.69361	0.292314	-5.7938	6.8813e-09	8.5482e-08	NA
ENSMUSG00000038400	1732.22	1.04887	0.181114	5.79121	6.9882e-09	8.66183e-08	Pmepa1
ENSMUSG00000120678	97.4565	-1.3847	0.239106	-5.79116	6.9901e-09	8.66183e-08	Gm30786
ENSMUSG00000132591	44.1925	-1.73145	0.299002	-5.79076	7.00667e-09	8.67699e-08	NA
ENSMUSG00000120990	52.2055	-2.05187	0.354413	-5.78949	7.06025e-09	8.73793e-08	NA
ENSMUSG00000054675	506.636	1.50941	0.260749	5.78875	7.09131e-09	8.77094e-08	Tmem119
ENSMUSG00000097776	125.233	-1.31461	0.227116	-5.78825	7.11236e-09	8.7807e-08	NA
ENSMUSG00000031387	92.21	1.25246	0.216426	5.787	7.16545e-09	8.84078e-08	Renbp
ENSMUSG00000024371	32.1765	2.21733	0.383691	5.77895	7.51704e-09	9.25174e-08	C2
ENSMUSG00000021265	178.915	-1.13851	0.197078	-5.77696	7.60629e-09	9.35583e-08	Slc25a29
ENSMUSG00000024737	102.758	1.50498	0.260667	5.77358	7.76065e-09	9.53397e-08	Slc15a3
ENSMUSG00000062257	30.901	-2.51125	0.435176	-5.77065	7.89682e-09	9.69529e-08	Opcml
ENSMUSG00000060594	108.217	1.32132	0.22899	5.77023	7.91651e-09	9.70863e-08	Layn
ENSMUSG00000050705	1355.54	-1.03701	0.179901	-5.76433	8.19848e-09	1.00226e-07	2310061I04Rik
ENSMUSG00000030827	17.0367	5.35257	0.928606	5.76409	8.21002e-09	1.00306e-07	Fgf21
ENSMUSG00000061086	19548.7	1.16162	0.201764	5.75734	8.54512e-09	1.04272e-07	Myl4
ENSMUSG00000117990	79.7404	-1.30812	0.227246	-5.7564	8.59248e-09	1.04722e-07	NA
ENSMUSG00000008035	835.425	-1.41144	0.245262	-5.75483	8.67276e-09	1.05572e-07	Mid1ip1
ENSMUSG00000034903	879.001	-1.05519	0.183549	-5.74882	8.98673e-09	1.09128e-07	Cobll1
ENSMUSG00000026972	113.07	1.34312	0.23366	5.74818	9.02094e-09	1.09477e-07	Arrdc1
ENSMUSG00000031778	356.133	1.18673	0.206532	5.74598	9.13894e-09	1.10775e-07	Cx3cl1
ENSMUSG00000075224	17.0674	-5.62605	0.980794	-5.73622	9.68138e-09	1.16996e-07	Lrrc55
ENSMUSG00000039254	207.386	-1.04497	0.182357	-5.73035	1.00221e-08	1.20894e-07	Pomt1
ENSMUSG00000021062	75.3059	2.0613	0.35991	5.72725	1.02071e-08	1.22903e-07	Rab15
ENSMUSG00000005268	56.1845	-1.45711	0.254448	-5.72655	1.02496e-08	1.23266e-07	Prlr
ENSMUSG00000028583	190.31	1.36129	0.238039	5.71879	1.07285e-08	1.28794e-07	Pdpn
ENSMUSG00000036617	429.29	-1.05084	0.183891	-5.71451	1.1002e-08	1.3176e-07	Etl4
ENSMUSG00000024411	57.3106	-1.97023	0.344844	-5.71338	1.10751e-08	1.32557e-07	Aqp4
ENSMUSG00000022667	22.392	2.9556	0.517774	5.7083	1.14113e-08	1.36336e-07	Cd200r1
ENSMUSG00000053279	752.284	1.24397	0.21798	5.70682	1.15103e-08	1.37355e-07	Aldh1a1
ENSMUSG00000132768	16.1766	-3.59215	0.629559	-5.70582	1.15786e-08	1.38087e-07	NA
ENSMUSG00000030616	114.193	1.12752	0.197816	5.69984	1.1992e-08	1.42851e-07	Sytl2
ENSMUSG00000022724	113.719	-1.21738	0.213582	-5.69983	1.19923e-08	1.42851e-07	Riox2
ENSMUSG00000087579	320.568	1.63193	0.286561	5.69487	1.23464e-08	1.46894e-07	Hectd2os
ENSMUSG00000135218	203.558	-1.71032	0.300487	-5.69182	1.25694e-08	1.4928e-07	Gm52720
ENSMUSG00000020218	178.494	-1.40654	0.247299	-5.68759	1.28841e-08	1.52837e-07	Wif1
ENSMUSG00000029468	163.498	1.48119	0.260502	5.68591	1.30117e-08	1.54259e-07	P2rx7
ENSMUSG00000032548	225.915	1.40858	0.247871	5.68273	1.32564e-08	1.56695e-07	Slco2a1
ENSMUSG00000042115	439.959	-1.23343	0.217089	-5.68166	1.33392e-08	1.57488e-07	Klhdc8a
ENSMUSG00000038267	179.816	-1.12719	0.198671	-5.67364	1.39797e-08	1.64274e-07	Slc22a23
ENSMUSG00000025262	88.9285	-1.43427	0.252866	-5.67206	1.41088e-08	1.65694e-07	Fam120c
ENSMUSG00000035849	243.195	-1.32418	0.233591	-5.6688	1.43801e-08	1.68681e-07	Krt222
ENSMUSG00000030587	17.349	3.14862	0.555774	5.66528	1.46783e-08	1.72079e-07	2200002D01Rik
ENSMUSG00000025145	175.974	1.16977	0.206515	5.66434	1.47595e-08	1.7293e-07	Lrrc45
ENSMUSG00000017969	763.276	1.31911	0.232916	5.66345	1.48356e-08	1.73718e-07	Ptgis
ENSMUSG00000031284	30.7536	3.28025	0.579392	5.66153	1.50029e-08	1.7537e-07	Pak3
ENSMUSG00000087177	150.385	1.12396	0.198651	5.658	1.53149e-08	1.78704e-07	E130307A14Rik
ENSMUSG00000036052	1452.86	-1.05892	0.187257	-5.6549	1.55933e-08	1.81846e-07	Dnajb5
ENSMUSG00000062591	79.2717	-1.44681	0.255987	-5.65191	1.58672e-08	1.84824e-07	Tubb4a
ENSMUSG00000121093	117.991	1.11868	0.197939	5.65167	1.58894e-08	1.84975e-07	NA
ENSMUSG00000002104	301.305	-1.14997	0.203618	-5.64765	1.6266e-08	1.89139e-07	Rapsn
ENSMUSG00000029862	53.1956	-2.67947	0.474463	-5.64737	1.62923e-08	1.89335e-07	Clcn1
ENSMUSG00000066363	15.8813	3.76801	0.667496	5.64499	1.65188e-08	1.91856e-07	Serpina3f
ENSMUSG00000067586	339.552	-1.01196	0.179333	-5.64294	1.67166e-08	1.94041e-07	S1pr3
ENSMUSG00000025188	91.2479	1.25213	0.221929	5.64204	1.68047e-08	1.9495e-07	Hps1
ENSMUSG00000024044	123.521	-1.21736	0.215782	-5.64161	1.68472e-08	1.95329e-07	Epb41l3
ENSMUSG00000019966	822.322	-1.09487	0.194082	-5.64127	1.68801e-08	1.95598e-07	Kitl
ENSMUSG00000059173	226.789	1.17269	0.208037	5.63695	1.73091e-08	2.00105e-07	Pde1a
ENSMUSG00000030659	161.229	1.34579	0.238822	5.63512	1.74938e-08	2.01879e-07	Nucb2
ENSMUSG00000020224	148.499	1.18583	0.210513	5.63304	1.77057e-08	2.041e-07	Llph
ENSMUSG00000030142	18.0544	4.68121	0.831356	5.63081	1.79361e-08	2.06518e-07	Clec4e
ENSMUSG00000021306	162.025	1.1856	0.210785	5.6247	1.85835e-08	2.13604e-07	Gpr137b
ENSMUSG00000000290	273.314	1.24001	0.220487	5.62397	1.86619e-08	2.14266e-07	Itgb2
ENSMUSG00000020826	121.967	-1.55505	0.276505	-5.62396	1.86625e-08	2.14266e-07	Nos2
ENSMUSG00000022032	335.475	-1.16106	0.206514	-5.62219	1.8855e-08	2.16227e-07	Scara5
ENSMUSG00000028370	26.7027	3.60279	0.6409	5.62145	1.89364e-08	2.17036e-07	Pappa
ENSMUSG00000026235	630.615	-1.55833	0.277565	-5.61429	1.97369e-08	2.25823e-07	Epha4
ENSMUSG00000026532	132.601	-1.19424	0.212779	-5.61256	1.99358e-08	2.27968e-07	Spta1
ENSMUSG00000068686	34.888	-1.89754	0.338357	-5.60812	2.04538e-08	2.33357e-07	Cd59b
ENSMUSG00000084839	26.1643	-2.64347	0.471605	-5.60526	2.07943e-08	2.36902e-07	Gm38455
ENSMUSG00000042357	39.0812	2.62502	0.468317	5.60521	2.08e-08	2.36902e-07	Gjb5
ENSMUSG00000002458	150.365	1.12534	0.200809	5.60405	2.09396e-08	2.38356e-07	Rgs19
ENSMUSG00000047085	407.369	-1.37128	0.244854	-5.60042	2.13831e-08	2.42989e-07	Lrrc4b
ENSMUSG00000029185	515.254	1.0302	0.184048	5.59744	2.17535e-08	2.46918e-07	Fam114a1
ENSMUSG00000033540	198.138	-1.20221	0.214884	-5.59473	2.2097e-08	2.50533e-07	Idua
ENSMUSG00000029499	385.01	-1.19948	0.214519	-5.59151	2.25105e-08	2.54932e-07	Pxmp2
ENSMUSG00000023078	149.353	3.06093	0.547804	5.58764	2.30171e-08	2.60374e-07	Cxcl13
ENSMUSG00000031939	107.01	1.07889	0.193132	5.58632	2.31937e-08	2.62075e-07	Taf1d
ENSMUSG00000027962	658.127	1.0748	0.192402	5.58621	2.32084e-08	2.62094e-07	Vcam1
ENSMUSG00000112707	284.733	-1.03624	0.185526	-5.58539	2.3317e-08	2.63024e-07	NA
ENSMUSG00000022489	84.5634	1.45724	0.26099	5.58351	2.35708e-08	2.65736e-07	Pde1b
ENSMUSG00000025316	171.225	-1.12316	0.20128	-5.58011	2.4037e-08	2.70534e-07	Banp
ENSMUSG00000037820	4659.6	1.1559	0.207167	5.57955	2.41148e-08	2.71105e-07	Tgm2
ENSMUSG00000028599	344.966	1.02623	0.183978	5.57801	2.43282e-08	2.73351e-07	Tnfrsf1b
ENSMUSG00000020264	270.382	-1.63477	0.293208	-5.57544	2.46901e-08	2.76986e-07	Slc36a2
ENSMUSG00000060843	218.174	-1.05918	0.189978	-5.57525	2.47168e-08	2.77094e-07	Ctnna3
ENSMUSG00000039001	3204.98	1.06155	0.190433	5.5744	2.48388e-08	2.78306e-07	Rps21
ENSMUSG00000056427	340.797	1.23797	0.222089	5.57423	2.48628e-08	2.78419e-07	Slit3
ENSMUSG00000052572	67.5361	1.51173	0.271406	5.57	2.54739e-08	2.84943e-07	Dlg2
ENSMUSG00000053963	74.4719	-1.55436	0.279148	-5.56822	2.57357e-08	2.87389e-07	Stum
ENSMUSG00000027716	102.717	-1.33117	0.239065	-5.56824	2.57331e-08	2.87389e-07	Trpc3
ENSMUSG00000046169	88.6527	1.87316	0.336624	5.56454	2.62844e-08	2.93353e-07	Adamts6
ENSMUSG00000037263	13.8903	-4.28727	0.770518	-5.56413	2.63459e-08	2.93875e-07	Aldh3b3
ENSMUSG00000000295	73.1581	1.50047	0.269853	5.56031	2.69294e-08	3.00049e-07	Hddc2
ENSMUSG00000072620	308.256	1.24775	0.224673	5.55362	2.79809e-08	3.10899e-07	Slfn2
ENSMUSG00000031712	333.349	-1.41167	0.254212	-5.55313	2.80603e-08	3.11608e-07	Il15
ENSMUSG00000030798	128.882	1.48459	0.267577	5.54826	2.88527e-08	3.19875e-07	Cd37
ENSMUSG00000021298	35.6209	2.4067	0.433832	5.54753	2.89739e-08	3.21041e-07	Gpr132
ENSMUSG00000118257	15.669	3.40543	0.614204	5.54446	2.94866e-08	3.25999e-07	NA
ENSMUSG00000033715	90.78	-1.3401	0.241718	-5.54404	2.95569e-08	3.26596e-07	Akr1c14
ENSMUSG00000035835	43.4384	1.62147	0.292524	5.54305	2.97245e-08	3.28085e-07	Plppr3
ENSMUSG00000030134	41.1741	2.00286	0.3614	5.54193	2.99148e-08	3.29821e-07	Rasgef1a
ENSMUSG00000004952	181.602	1.65187	0.298354	5.5366	3.08408e-08	3.39123e-07	Rasa4
ENSMUSG00000023094	622.776	-1.13798	0.205592	-5.53517	3.10927e-08	3.4149e-07	Msrb2
ENSMUSG00000112148	34.6156	2.32009	0.41921	5.53443	3.12236e-08	3.42466e-07	Lilrb4a
ENSMUSG00000017491	77.7603	-1.29066	0.233218	-5.53412	3.12796e-08	3.4279e-07	Rarb
ENSMUSG00000097640	18.8622	3.40419	0.615244	5.53308	3.14664e-08	3.4446e-07	LOC105244755
ENSMUSG00000032231	2457.33	1.18631	0.214416	5.53272	3.15304e-08	3.44972e-07	Anxa2
ENSMUSG00000032584	87.3308	1.14171	0.206431	5.53072	3.18918e-08	3.48544e-07	Mst1r
ENSMUSG00000063193	50.2345	1.96745	0.355829	5.5292	3.21702e-08	3.51394e-07	Cd300lb
ENSMUSG00000120313	88.8193	-1.9229	0.347809	-5.52862	3.22757e-08	3.52355e-07	NA
ENSMUSG00000023087	760.642	-1.41691	0.256479	-5.52448	3.3046e-08	3.59782e-07	Noct
ENSMUSG00000021835	122.175	1.11329	0.201567	5.52315	3.32971e-08	3.62319e-07	Bmp4
ENSMUSG00000021614	525.284	1.53226	0.277641	5.51883	3.41258e-08	3.70933e-07	Vcan
ENSMUSG00000034041	223.255	1.31807	0.238935	5.51643	3.4595e-08	3.7542e-07	Lyl1
ENSMUSG00000019590	452.74	1.44833	0.263063	5.50563	3.67855e-08	3.98759e-07	Cyb561
ENSMUSG00000044067	379.526	-1.42222	0.258392	-5.5041	3.71054e-08	4.01991e-07	Gpr22
ENSMUSG00000027075	90.683	1.50683	0.273836	5.50268	3.74067e-08	4.04834e-07	Slc43a1
ENSMUSG00000061723	251.649	5.26798	0.958398	5.49665	3.87069e-08	4.18227e-07	Tnnt3
ENSMUSG00000037344	130.693	1.2383	0.225336	5.49536	3.89915e-08	4.21074e-07	Slc12a9
ENSMUSG00000022863	202.077	1.28419	0.233759	5.49366	3.93689e-08	4.24896e-07	Btg3
ENSMUSG00000023336	164.463	-1.10859	0.20181	-5.49322	3.94673e-08	4.25524e-07	Wfdc1
ENSMUSG00000029167	871.944	-1.26839	0.230949	-5.4921	3.9719e-08	4.27776e-07	Ppargc1a
ENSMUSG00000046694	225.85	3.58737	0.653459	5.48981	4.02361e-08	4.32879e-07	Tent5b
ENSMUSG00000075266	19.0294	2.59088	0.471969	5.48951	4.03039e-08	4.33375e-07	Cenpw
ENSMUSG00000074272	188.846	-1.04047	0.189837	-5.48085	4.23291e-08	4.54174e-07	Ceacam1
ENSMUSG00000090125	40.2088	3.03134	0.553394	5.47773	4.30827e-08	4.61518e-07	Pou3f1
ENSMUSG00000071715	74.2387	1.80549	0.329771	5.475	4.37517e-08	4.68183e-07	Ncf4
ENSMUSG00000047996	138.28	-1.22197	0.223422	-5.46932	4.51755e-08	4.82902e-07	Prrg1
ENSMUSG00000004939	1066.55	4.19867	0.768296	5.46491	4.63129e-08	4.93478e-07	Nmrk2
ENSMUSG00000020137	135.835	-1.04793	0.191783	-5.46414	4.65157e-08	4.95375e-07	Thap2
ENSMUSG00000006360	1956.86	1.16252	0.212898	5.46047	4.74875e-08	5.04649e-07	Crip1
ENSMUSG00000120126	103.099	1.74661	0.320153	5.45554	4.88229e-08	5.17191e-07	NA
ENSMUSG00000021384	36.73	1.98174	0.363318	5.45457	4.90902e-08	5.19473e-07	Susd3
ENSMUSG00000048865	117.523	1.20704	0.221337	5.45342	4.94103e-08	5.22584e-07	Arhgap30
ENSMUSG00000052135	129.213	-1.81587	0.333057	-5.45213	4.97702e-08	5.25835e-07	Foxo6
ENSMUSG00000022636	103.175	1.37963	0.253106	5.4508	5.0144e-08	5.29504e-07	Alcam
ENSMUSG00000029082	70.9365	1.70091	0.312537	5.44227	5.26063e-08	5.54919e-07	Bst1
ENSMUSG00000091478	160.991	-1.05872	0.194559	-5.44165	5.2789e-08	5.56553e-07	NA
ENSMUSG00000031204	101.159	-1.3131	0.241424	-5.43898	5.35856e-08	5.64059e-07	Asb12
ENSMUSG00000079105	97.4677	1.38766	0.255388	5.43353	5.52494e-08	5.80961e-07	C7
ENSMUSG00000071637	1419.47	2.38466	0.438952	5.43261	5.55352e-08	5.83659e-07	Cebpd
ENSMUSG00000030707	452.342	1.23313	0.227027	5.43166	5.58324e-08	5.86167e-07	Coro1a
ENSMUSG00000058740	20.9309	3.32667	0.612674	5.42975	5.64333e-08	5.92165e-07	Kcnt1
ENSMUSG00000117110	18.1434	3.97505	0.732369	5.42767	5.70954e-08	5.98799e-07	NA
ENSMUSG00000021453	546.225	2.20205	0.405844	5.42585	5.76798e-08	6.0461e-07	Gadd45g
ENSMUSG00000025934	243.056	1.23374	0.227521	5.42252	5.87659e-08	6.14706e-07	Gsta3
ENSMUSG00000053641	167.802	1.20419	0.22207	5.42256	5.87501e-08	6.14706e-07	Dennd4a
ENSMUSG00000010830	333.143	1.27794	0.235847	5.41849	6.01038e-08	6.28044e-07	Kdelr3
ENSMUSG00000022096	390.566	-1.22456	0.226209	-5.41337	6.18483e-08	6.44925e-07	Hr
ENSMUSG00000115100	124.262	-1.10442	0.204054	-5.41239	6.219e-08	6.47812e-07	NA
ENSMUSG00000037860	40.7548	2.1097	0.389863	5.41138	6.25395e-08	6.51114e-07	Aim2
ENSMUSG00000039221	58.3315	1.68835	0.31202	5.41104	6.26598e-08	6.52027e-07	Rpl22l1
ENSMUSG00000004707	37.9501	2.06424	0.3823	5.39952	6.68212e-08	6.92807e-07	Ly9
ENSMUSG00000036246	123.132	1.21916	0.225868	5.39765	6.75202e-08	6.99329e-07	Gmip
ENSMUSG00000039670	367.877	-1.02207	0.189425	-5.39564	6.82812e-08	7.06844e-07	Oxld1
ENSMUSG00000031558	179.838	1.21975	0.226133	5.39393	6.89349e-08	7.11988e-07	Slit2
ENSMUSG00000051341	105.869	1.05424	0.195445	5.39404	6.88928e-08	7.11988e-07	Zfp52
ENSMUSG00000004328	35.0127	2.44234	0.45302	5.39124	6.99748e-08	7.2139e-07	Hif3a
ENSMUSG00000047171	15.0375	-4.65629	0.863903	-5.38984	7.05224e-08	7.2666e-07	Helt
ENSMUSG00000099398	20.8743	3.21063	0.596301	5.38424	7.27495e-08	7.48067e-07	Ms4a14
ENSMUSG00000020812	38.9185	1.85812	0.345233	5.38223	7.35694e-08	7.55332e-07	Snhg16
ENSMUSG00000068740	98.4283	-1.53475	0.285351	-5.37846	7.51246e-08	7.70509e-07	Celsr2
ENSMUSG00000144056	16.6251	-6.17704	1.1498	-5.37226	7.77566e-08	7.95871e-07	NA
ENSMUSG00000031371	111.849	1.14367	0.213138	5.36589	8.05522e-08	8.21971e-07	Haus7
ENSMUSG00000020656	19.2199	2.68896	0.501122	5.36589	8.05532e-08	8.21971e-07	Grhl1
ENSMUSG00000024806	177.366	1.6382	0.305572	5.36111	8.2713e-08	8.42292e-07	Mlana
ENSMUSG00000021208	13.8369	3.37016	0.629772	5.3514	8.72782e-08	8.85175e-07	Ifi27l2b
ENSMUSG00000054203	104.825	1.57583	0.294934	5.34298	9.14296e-08	9.23998e-07	Ifi205
ENSMUSG00000093482	48.0515	-1.59765	0.2993	-5.33795	9.40054e-08	9.4907e-07	Gm20619
ENSMUSG00000045193	754.007	1.26043	0.23618	5.33672	9.46423e-08	9.54537e-07	Cirbp
ENSMUSG00000043157	25.6609	2.04027	0.38232	5.33654	9.47354e-08	9.54994e-07	Arl11
ENSMUSG00000026824	1090.66	-1.20133	0.22526	-5.33307	9.6568e-08	9.72978e-07	Kcnj3
ENSMUSG00000054641	226.937	1.27055	0.238356	5.33049	9.79492e-08	9.86396e-07	Mmrn1
ENSMUSG00000021998	667.386	1.04212	0.1957	5.3251	1.00896e-07	1.01521e-06	Lcp1
ENSMUSG00000055489	13.0286	-4.45648	0.837567	-5.32074	1.03347e-07	1.03866e-06	Ano5
ENSMUSG00000052188	40.3773	1.82793	0.343604	5.31988	1.03838e-07	1.04307e-06	NA
ENSMUSG00000085761	20.8258	2.4423	0.459539	5.31467	1.06852e-07	1.0712e-06	4930455G09Rik
ENSMUSG00000049382	63.8034	1.92253	0.361896	5.31237	1.08208e-07	1.08425e-06	Krt8
ENSMUSG00000060882	262.336	-2.52338	0.475296	-5.30908	1.10179e-07	1.10124e-06	Kcnd2
ENSMUSG00000120415	11.1535	-4.55433	0.858659	-5.304	1.13289e-07	1.12726e-06	NA
ENSMUSG00000037169	34.5596	-2.10882	0.397618	-5.30363	1.13523e-07	1.12902e-06	Mycn
ENSMUSG00000028680	112.578	1.23413	0.232809	5.30102	1.15156e-07	1.14469e-06	Plk3
ENSMUSG00000048440	142.594	1.13477	0.21414	5.2992	1.16309e-07	1.15558e-06	Cyp4f16
ENSMUSG00000050777	153.868	1.757	0.331668	5.29747	1.17419e-07	1.16545e-06	Tmem37
ENSMUSG00000031628	100.825	1.0148	0.191573	5.29721	1.17584e-07	1.16593e-06	Casp3
ENSMUSG00000021823	554.338	-1.01156	0.190959	-5.29723	1.17572e-07	1.16593e-06	Vcl
ENSMUSG00000031595	166.003	1.1646	0.219866	5.29686	1.17812e-07	1.16761e-06	Pdgfrl
ENSMUSG00000106783	120.106	-3.32689	0.628361	-5.29455	1.19312e-07	1.1813e-06	NA
ENSMUSG00000030849	54.6325	1.8377	0.347327	5.29099	1.21655e-07	1.20272e-06	Fgfr2
ENSMUSG00000117251	74.2063	-1.56879	0.296758	-5.28641	1.24737e-07	1.23076e-06	NA
ENSMUSG00000028389	49.0805	1.47682	0.279501	5.2838	1.26533e-07	1.24663e-06	Zfp37
ENSMUSG00000054659	219.372	-1.38864	0.262996	-5.2801	1.29111e-07	1.2689e-06	Pm20d2
ENSMUSG00000039488	37.4351	-1.54375	0.292398	-5.27961	1.29456e-07	1.27167e-06	Cntn5
ENSMUSG00000020102	141.659	-1.31156	0.248483	-5.27824	1.30429e-07	1.2806e-06	Slc16a7
ENSMUSG00000035274	37.2755	1.90114	0.360202	5.27797	1.30623e-07	1.28188e-06	Tpbg
ENSMUSG00000045312	189.498	1.19704	0.226822	5.27744	1.31001e-07	1.28495e-06	Lhfpl2
ENSMUSG00000028989	1027.32	3.28526	0.622574	5.27689	1.31394e-07	1.28818e-06	Angptl7
ENSMUSG00000074971	591.97	1.43282	0.27158	5.27586	1.32133e-07	1.29479e-06	Fibin
ENSMUSG00000039153	29.2716	1.8484	0.350356	5.27576	1.32206e-07	1.29487e-06	Runx2
ENSMUSG00000064246	205.403	4.62995	0.877874	5.27405	1.33448e-07	1.30639e-06	Chi3l1
ENSMUSG00000079355	157.872	1.75977	0.333896	5.27041	1.36119e-07	1.33124e-06	Ackr4
ENSMUSG00000052560	167.775	1.08941	0.206738	5.2695	1.36796e-07	1.33721e-06	Cpne8
ENSMUSG00000066800	93.5701	1.45722	0.276726	5.26592	1.39493e-07	1.3609e-06	Rnasel
ENSMUSG00000039321	14.9958	-3.20415	0.608993	-5.26139	1.42967e-07	1.39344e-06	Uts2r
ENSMUSG00000133677	48.1606	1.75809	0.334455	5.25659	1.46755e-07	1.42827e-06	NA
ENSMUSG00000026675	204.159	-1.01873	0.193935	-5.25293	1.49696e-07	1.45548e-06	Hsd17b7
ENSMUSG00000039476	44.8892	2.28996	0.435999	5.25221	1.50287e-07	1.46046e-06	Prrx2
ENSMUSG00000044258	360.065	2.61477	0.49785	5.25213	1.50354e-07	1.46046e-06	Ctla2a
ENSMUSG00000032265	443.592	1.22849	0.23394	5.25131	1.51023e-07	1.46624e-06	Tent5a
ENSMUSG00000098112	43.5308	1.75042	0.333897	5.2424	1.58502e-07	1.53512e-06	Bin2
ENSMUSG00000031898	7.31861	6.19867	1.18268	5.2412	1.59538e-07	1.54366e-06	Dpep3
ENSMUSG00000120078	38.2276	-1.91594	0.365878	-5.23656	1.63596e-07	1.57988e-06	NA
ENSMUSG00000027408	188.68	1.24495	0.237769	5.23595	1.64135e-07	1.58432e-06	Cpxm1
ENSMUSG00000029373	533.683	1.09491	0.209326	5.23063	1.6893e-07	1.62746e-06	Pf4
ENSMUSG00000141856	46.9405	2.10454	0.402431	5.22957	1.69907e-07	1.6353e-06	NA
ENSMUSG00000112762	13.427	3.52002	0.673373	5.22745	1.71868e-07	1.65099e-06	4930459C07Rik
ENSMUSG00000001627	749.861	1.0447	0.199982	5.22395	1.75146e-07	1.68087e-06	Ifrd1
ENSMUSG00000090841	3192.73	1.03035	0.197274	5.22295	1.761e-07	1.6892e-06	Myl6
ENSMUSG00000036820	154.181	1.10675	0.212034	5.21967	1.7924e-07	1.71686e-06	Amdhd2
ENSMUSG00000053199	243.986	-1.23861	0.237307	-5.21945	1.79457e-07	1.71691e-06	Arhgap20
ENSMUSG00000038670	248.203	-1.02983	0.197525	-5.21364	1.85173e-07	1.76945e-06	Mybpc2
ENSMUSG00000051067	229.389	-2.92512	0.561081	-5.21337	1.85441e-07	1.77117e-06	Lingo3
ENSMUSG00000044017	220.043	1.0405	0.199654	5.21154	1.87284e-07	1.78792e-06	Adgrd1
ENSMUSG00000026321	54.4534	1.51927	0.291693	5.20845	1.90427e-07	1.81618e-06	Tnfrsf11a
ENSMUSG00000107368	39.057	-1.59666	0.30667	-5.20643	1.92504e-07	1.83425e-06	NA
ENSMUSG00000035283	334.848	-1.2777	0.245535	-5.20374	1.95312e-07	1.85481e-06	Adrb1
ENSMUSG00000027322	120.448	1.48341	0.285101	5.20311	1.95981e-07	1.8594e-06	Siglec1
ENSMUSG00000025384	411.94	-1.0163	0.19533	-5.20295	1.96145e-07	1.86008e-06	Faap100
ENSMUSG00000114286	25.706	-2.04938	0.394028	-5.2011	1.98113e-07	1.87785e-06	NA
ENSMUSG00000020627	42.8438	2.37542	0.45691	5.19888	2.00491e-07	1.89949e-06	Klhl29
ENSMUSG00000056666	654.157	-1.13703	0.218821	-5.19618	2.03423e-07	1.92362e-06	Retsat
ENSMUSG00000023262	159.883	-1.0156	0.195517	-5.19443	2.05351e-07	1.94094e-06	Acy1
ENSMUSG00000015312	241.746	1.33922	0.257884	5.19309	2.06829e-07	1.95398e-06	Gadd45b
ENSMUSG00000040829	96.731	1.51776	0.292365	5.19132	2.08809e-07	1.97175e-06	Zmynd15
ENSMUSG00000027692	193.085	-1.0465	0.201675	-5.18905	2.11373e-07	1.99314e-06	Tnik
ENSMUSG00000022999	186.812	1.10928	0.213843	5.18735	2.13306e-07	2.00759e-06	Lmbr1l
ENSMUSG00000045404	34.2532	2.31926	0.447719	5.18016	2.21695e-07	2.08067e-06	Kcnk13
ENSMUSG00000026981	20.1386	3.50721	0.677543	5.17637	2.2625e-07	2.12043e-06	Il1rn
ENSMUSG00000097277	316.027	-1.0836	0.209384	-5.17519	2.27679e-07	2.13082e-06	2900076A07Rik
ENSMUSG00000002289	158.315	1.48101	0.286198	5.17478	2.28186e-07	2.13457e-06	Angptl4
ENSMUSG00000048234	169.885	1.42308	0.275007	5.17468	2.28297e-07	2.13461e-06	Rnf149
ENSMUSG00000034057	15.4815	-3.98672	0.77101	-5.17078	2.33118e-07	2.17732e-06	Myrfl
ENSMUSG00000085457	31.3203	1.96886	0.38077	5.17072	2.33191e-07	2.17732e-06	1110046J04Rik
ENSMUSG00000019082	567.237	-1.0438	0.202052	-5.16597	2.39191e-07	2.23126e-06	Slc25a22
ENSMUSG00000041845	128.44	1.26883	0.245712	5.16388	2.41879e-07	2.25529e-06	Rhod
ENSMUSG00000026395	204.446	1.38505	0.268309	5.16213	2.44157e-07	2.27546e-06	Ptprc
ENSMUSG00000091119	44.6241	1.81193	0.351025	5.16181	2.44568e-07	2.27823e-06	Ccdc152
ENSMUSG00000110218	18.0775	2.78221	0.539218	5.15971	2.47333e-07	2.30078e-06	Tincr
ENSMUSG00000051041	136.877	1.20301	0.23328	5.15694	2.51012e-07	2.33174e-06	Olfml1
ENSMUSG00000056054	164.381	4.28655	0.831518	5.15509	2.53503e-07	2.35269e-06	S100a8
ENSMUSG00000029380	24.3825	2.1627	0.420389	5.14452	2.68202e-07	2.4845e-06	Cxcl1
ENSMUSG00000031298	30.3581	2.11077	0.410515	5.14177	2.72166e-07	2.51656e-06	Adgrg2
ENSMUSG00000025701	193.948	-1.23854	0.240933	-5.1406	2.73866e-07	2.53111e-06	Alox5
ENSMUSG00000040435	777.335	1.11662	0.217391	5.13645	2.79983e-07	2.58287e-06	Ppp1r15a
ENSMUSG00000020689	112.679	1.17547	0.22887	5.13599	2.80669e-07	2.58801e-06	Itgb3
ENSMUSG00000100975	73.4372	1.15957	0.225841	5.13445	2.82965e-07	2.60497e-06	NA
ENSMUSG00000087590	25.7799	2.47887	0.482796	5.13441	2.8303e-07	2.60497e-06	Epb41l4aos
ENSMUSG00000024593	44.4917	1.55327	0.302751	5.13051	2.88955e-07	2.65605e-06	Megf10
ENSMUSG00000020312	107.337	1.04728	0.204262	5.12715	2.94156e-07	2.69992e-06	Shc2
ENSMUSG00000025747	57.3888	1.6736	0.326438	5.12685	2.9463e-07	2.70303e-06	Tyms
ENSMUSG00000043832	53.686	1.73292	0.338092	5.12558	2.96627e-07	2.71885e-06	Clec4a3
ENSMUSG00000040867	31.1531	1.7819	0.347753	5.12403	2.99066e-07	2.73745e-06	Begain
ENSMUSG00000029408	185.633	-1.00375	0.196087	-5.11893	3.07274e-07	2.80744e-06	Abcb9
ENSMUSG00000113581	18.9456	3.07404	0.600578	5.11847	3.08032e-07	2.81308e-06	Dio3os
ENSMUSG00000033633	13.7348	-3.84153	0.750882	-5.11602	3.12044e-07	2.84582e-06	Clec18a
ENSMUSG00000027074	1842.21	1.11076	0.217316	5.11125	3.2003e-07	2.91334e-06	Slc43a3
ENSMUSG00000060716	26.491	-2.68593	0.526033	-5.10602	3.2902e-07	2.9843e-06	Plekhh1
ENSMUSG00000029279	28.4501	2.04836	0.401498	5.10181	3.36424e-07	3.0487e-06	Brdt
ENSMUSG00000037432	50.4383	-1.58585	0.31088	-5.10115	3.37588e-07	3.05783e-06	Fer1l5
ENSMUSG00000057346	27.2335	3.35216	0.657149	5.10107	3.37737e-07	3.05783e-06	Apol9a
ENSMUSG00000120806	14.0146	3.39272	0.665145	5.10072	3.38361e-07	3.06209e-06	NA
ENSMUSG00000050370	12.1015	4.08339	0.801493	5.09473	3.49244e-07	3.15344e-06	Ch25h
ENSMUSG00000028597	285.84	1.04221	0.204906	5.08628	3.65163e-07	3.28384e-06	Gpx7
ENSMUSG00000043614	29.9497	1.85637	0.365471	5.07938	3.78676e-07	3.4023e-06	Vps37d
ENSMUSG00000087684	14.5335	3.28217	0.646316	5.07827	3.80884e-07	3.41907e-06	NA
ENSMUSG00000121111	23.8893	-2.09698	0.413642	-5.06956	3.98746e-07	3.5778e-06	NA
ENSMUSG00000054520	110.452	1.1831	0.233384	5.06932	3.99248e-07	3.5807e-06	Sh3bp2
ENSMUSG00000052821	58.1598	1.4872	0.293504	5.06706	4.03997e-07	3.61842e-06	Cysltr1
ENSMUSG00000132266	75.0399	1.57601	0.311114	5.06568	4.06936e-07	3.64311e-06	NA
ENSMUSG00000023045	15.3628	3.72256	0.735393	5.062	4.14888e-07	3.70933e-06	Soat2
ENSMUSG00000034796	21.8347	3.17951	0.628344	5.06014	4.18956e-07	3.74235e-06	Cpne7
ENSMUSG00000027859	174.91	1.42407	0.281596	5.05713	4.25609e-07	3.80008e-06	Ngf
ENSMUSG00000125973	10.4558	-4.11487	0.814063	-5.05473	4.31003e-07	3.84652e-06	NA
ENSMUSG00000037129	19.8726	-2.097	0.414901	-5.05423	4.32141e-07	3.85496e-06	Tmprss13
ENSMUSG00000068758	164.219	1.18439	0.234383	5.0532	4.34458e-07	3.87217e-06	Il3ra
ENSMUSG00000021234	92.9666	-1.13119	0.223881	-5.05264	4.35733e-07	3.87836e-06	Fam161b
ENSMUSG00000017724	30.4477	2.35252	0.465978	5.04856	4.45161e-07	3.95698e-06	Etv4
ENSMUSG00000021575	55.9323	-1.73126	0.342965	-5.04793	4.46618e-07	3.96818e-06	Ahrr
ENSMUSG00000031765	4792.43	1.14439	0.226874	5.04415	4.55532e-07	4.04019e-06	Mt1
ENSMUSG00000091971	130.335	-2.03289	0.403795	-5.03446	4.79199e-07	4.22574e-06	Hspa1a
ENSMUSG00000061046	130.908	1.11422	0.221329	5.03422	4.79801e-07	4.22919e-06	Haghl
ENSMUSG00000008845	432.16	1.15816	0.230122	5.03283	4.83283e-07	4.258e-06	Cd163
ENSMUSG00000048521	34.6923	2.47009	0.491216	5.02852	4.9427e-07	4.35097e-06	Cxcr6
ENSMUSG00000027737	12.3996	4.89382	0.973293	5.02811	4.95336e-07	4.35843e-06	Slc7a11
ENSMUSG00000049988	120.48	1.15089	0.228938	5.02708	4.98002e-07	4.37996e-06	Lrrc25
ENSMUSG00000121084	63.6936	1.55683	0.309888	5.02384	5.06476e-07	4.44863e-06	NA
ENSMUSG00000020635	33.5839	1.71345	0.341103	5.02326	5.08004e-07	4.46009e-06	Fkbp1b
ENSMUSG00000028671	41.3449	1.64568	0.327634	5.02292	5.08915e-07	4.46612e-06	Gale
ENSMUSG00000056071	167.318	3.71883	0.740625	5.02121	5.13473e-07	4.5002e-06	S100a9
ENSMUSG00000015659	62.7462	-1.31129	0.261197	-5.0203	5.15907e-07	4.51956e-06	Serac1
ENSMUSG00000034947	252.62	1.06719	0.212925	5.01205	5.38543e-07	4.70343e-06	Tmem106a
ENSMUSG00000022598	17.3759	3.42884	0.684409	5.00993	5.44498e-07	4.75337e-06	Psca
ENSMUSG00000061808	31.0261	2.29277	0.458311	5.00265	5.65481e-07	4.93009e-06	Ttr
ENSMUSG00000015405	51.6135	1.70054	0.340019	5.00129	5.69477e-07	4.95628e-06	Ace2
ENSMUSG00000031963	101.384	1.16549	0.233269	4.99633	5.84308e-07	5.07873e-06	Bmper
ENSMUSG00000021360	137.065	1.1333	0.22686	4.99557	5.86623e-07	5.09664e-06	Gcnt2
ENSMUSG00000133722	18.1174	-2.4378	0.488564	-4.98973	6.04643e-07	5.24636e-06	NA
ENSMUSG00000071347	195.98	-1.06551	0.213638	-4.98748	6.11711e-07	5.30079e-06	C1qtnf9
ENSMUSG00000000386	36.8164	2.81066	0.565289	4.97207	6.62428e-07	5.72292e-06	Mx1
ENSMUSG00000026971	128.461	-4.07043	0.818688	-4.9719	6.63006e-07	5.72544e-06	Itgb6
ENSMUSG00000079012	17.012	5.36234	1.0793	4.96835	6.75266e-07	5.8288e-06	Serpina3m
ENSMUSG00000029484	798.508	1.08635	0.218819	4.96462	6.88353e-07	5.92897e-06	Anxa3
ENSMUSG00000079491	47.329	1.55443	0.313172	4.96349	6.92363e-07	5.95838e-06	H2-T10
ENSMUSG00000114792	46.2559	-2.16727	0.436837	-4.96127	7.00355e-07	6.01938e-06	Gm6416
ENSMUSG00000022180	129.269	1.29563	0.261241	4.9595	7.06761e-07	6.06923e-06	Slc7a8
ENSMUSG00000043085	139.361	-1.41717	0.285844	-4.95786	7.12746e-07	6.11536e-06	Tmem82
ENSMUSG00000021950	116.885	2.97218	0.599961	4.95395	7.27215e-07	6.22882e-06	Anxa8
ENSMUSG00000026315	57.9267	1.21743	0.245831	4.95231	7.33363e-07	6.27611e-06	Serpinb8
ENSMUSG00000070803	721.857	-1.09401	0.221014	-4.94995	7.42329e-07	6.34199e-06	Cited4
ENSMUSG00000087107	20.6043	2.72038	0.549725	4.94863	7.47381e-07	6.3797e-06	Slfnlnc
ENSMUSG00000070424	266.952	-1.28881	0.260627	-4.94505	7.61227e-07	6.47853e-06	Art5
ENSMUSG00000034460	64.4373	-1.31316	0.26588	-4.93894	7.85492e-07	6.67085e-06	Six4
ENSMUSG00000049580	136.807	1.14945	0.232854	4.93635	7.9597e-07	6.75123e-06	Tsku
ENSMUSG00000083307	39.145	2.01788	0.408881	4.93512	8.01031e-07	6.79128e-06	AA414768
ENSMUSG00000017697	38.018	1.82326	0.369457	4.93497	8.01613e-07	6.79333e-06	Ada
ENSMUSG00000019876	38.0157	1.82801	0.370462	4.9344	8.03956e-07	6.8103e-06	Pkib
ENSMUSG00000039232	104.88	1.10256	0.223447	4.93432	8.04305e-07	6.81037e-06	Stx11
ENSMUSG00000025006	1704.97	-1.16239	0.23563	-4.93312	8.09268e-07	6.8495e-06	Sorbs1
ENSMUSG00000029163	1164.77	1.1062	0.224405	4.92949	8.24443e-07	6.96614e-06	Emilin1
ENSMUSG00000033538	78.7536	1.60062	0.324776	4.92839	8.29118e-07	6.99973e-06	Casp4
ENSMUSG00000118221	28.9388	-2.6822	0.544352	-4.92732	8.33668e-07	7.03441e-06	NA
ENSMUSG00000030499	82.8086	1.11426	0.226174	4.92657	8.36837e-07	7.05001e-06	Kctd15
ENSMUSG00000143652	42.6073	1.79164	0.363682	4.9264	8.37565e-07	7.05318e-06	NA
ENSMUSG00000121204	22.938	-1.96307	0.398572	-4.92527	8.4246e-07	7.09141e-06	NA
ENSMUSG00000098055	23.0799	2.7654	0.561837	4.92207	8.5634e-07	7.19916e-06	Gm36750
ENSMUSG00000052760	36.5085	1.65539	0.336508	4.91932	8.68436e-07	7.29471e-06	A630001G21Rik
ENSMUSG00000063652	26.5078	2.24565	0.456961	4.91432	8.90921e-07	7.47417e-06	Slc22a21
ENSMUSG00000064360	121.902	-1.06759	0.217338	-4.9121	9.01045e-07	7.55593e-06	mt-Nd3
ENSMUSG00000056116	744.792	1.10823	0.22568	4.91063	9.07824e-07	7.6064e-06	H2-T22
ENSMUSG00000116305	29.8351	1.8803	0.383028	4.90904	9.15256e-07	7.65905e-06	Lncppara
ENSMUSG00000023484	41.8999	2.52602	0.514655	4.90819	9.19216e-07	7.68287e-06	Prph
ENSMUSG00000100801	99.3675	-1.02079	0.208121	-4.90478	9.35344e-07	7.80429e-06	Gm15459
ENSMUSG00000020142	127.399	1.63542	0.333476	4.90416	9.38262e-07	7.82018e-06	Slc1a4
ENSMUSG00000029228	136.349	-1.18582	0.241829	-4.90356	9.41138e-07	7.83629e-06	Lnx1
ENSMUSG00000062082	14.0725	5.0675	1.03369	4.90234	9.46998e-07	7.8818e-06	Cd200r4
ENSMUSG00000133694	12.667	-3.19267	0.651522	-4.90032	9.56788e-07	7.95997e-06	NA
ENSMUSG00000116851	11.5102	-3.0404	0.620541	-4.89959	9.60347e-07	7.98625e-06	NA
ENSMUSG00000129963	35.651	-2.06297	0.421235	-4.89743	9.70977e-07	8.06794e-06	NA
ENSMUSG00000005628	188.151	-2.48794	0.508394	-4.89372	9.89478e-07	8.21e-06	Tmod4
ENSMUSG00000018822	150.907	-1.71594	0.350696	-4.89297	9.93279e-07	8.22932e-06	Sfrp5
ENSMUSG00000079057	102.553	1.05446	0.215678	4.88906	1.01317e-06	8.38367e-06	Cyp4v3
ENSMUSG00000021728	97.0005	1.45819	0.298526	4.88463	1.03623e-06	8.56386e-06	Emb
ENSMUSG00000022372	96.9836	1.69622	0.347432	4.88216	1.0493e-06	8.66116e-06	Sla
ENSMUSG00000044952	60.2853	-1.37169	0.281007	-4.88136	1.05357e-06	8.69284e-06	Kctd21
ENSMUSG00000062198	80.996	-1.17731	0.241348	-4.87807	1.07131e-06	8.83194e-06	2700097O09Rik
ENSMUSG00000027386	76.6345	1.69471	0.347446	4.87763	1.07368e-06	8.84781e-06	Fbln7
ENSMUSG00000047810	66.2482	1.46934	0.301523	4.87305	1.09891e-06	9.04082e-06	Ccdc88b
ENSMUSG00000040998	60.6516	-1.42212	0.292073	-4.86904	1.1214e-06	9.20687e-06	Npnt
ENSMUSG00000018166	177.263	-1.03196	0.211991	-4.86794	1.12766e-06	9.25067e-06	Erbb3
ENSMUSG00000020424	197.192	1.00569	0.206777	4.86364	1.15244e-06	9.43074e-06	Castor1
ENSMUSG00000099552	5.27539	-5.97628	1.22883	-4.86339	1.15394e-06	9.43919e-06	NA
ENSMUSG00000031596	125.579	1.14275	0.235016	4.86242	1.15961e-06	9.48172e-06	Slc7a2
ENSMUSG00000025742	226.289	-1.04387	0.214853	-4.85852	1.18264e-06	9.65423e-06	Prps2
ENSMUSG00000070031	34.3322	1.76327	0.36326	4.85401	1.20991e-06	9.85267e-06	Sp140
ENSMUSG00000040663	81.2323	1.51703	0.31301	4.84659	1.25604e-06	1.02076e-05	Clcf1
ENSMUSG00000031886	22.8425	-2.33867	0.482811	-4.84386	1.27339e-06	1.0336e-05	Ces2e
ENSMUSG00000041642	50.6872	1.85794	0.38358	4.84368	1.27457e-06	1.03413e-05	Kif21b
ENSMUSG00000120058	52.7874	-2.09493	0.43265	-4.8421	1.28472e-06	1.04152e-05	NA
ENSMUSG00000033578	85.7336	-1.6318	0.337018	-4.84187	1.28622e-06	1.0419e-05	Tmem35a
ENSMUSG00000031266	80.8578	1.2505	0.258266	4.8419	1.28606e-06	1.0419e-05	Gla
ENSMUSG00000030107	102.006	1.76183	0.36392	4.84124	1.29029e-06	1.04477e-05	Usp18
ENSMUSG00000024854	57.8913	1.40532	0.290297	4.84097	1.29207e-06	1.04579e-05	Pold4
ENSMUSG00000031104	34.6134	1.86982	0.386449	4.83846	1.30848e-06	1.05741e-05	Rab33a
ENSMUSG00000034768	25.5738	-2.31337	0.478669	-4.83293	1.34536e-06	1.0841e-05	Asb16
ENSMUSG00000031097	67.9422	1.41195	0.292444	4.82811	1.37836e-06	1.10934e-05	Tnni2
ENSMUSG00000024483	128.019	-1.15935	0.240153	-4.82756	1.38215e-06	1.11195e-05	Ankhd1
ENSMUSG00000044244	38.2611	2.14553	0.444492	4.82694	1.38649e-06	1.11499e-05	Il20rb
ENSMUSG00000126531	16.3011	-2.4638	0.51055	-4.82578	1.39456e-06	1.12058e-05	NA
ENSMUSG00000043505	45.2538	1.4419	0.299135	4.82022	1.434e-06	1.14996e-05	Gimap5
ENSMUSG00000052026	25.9386	2.01964	0.419031	4.81978	1.4372e-06	1.15206e-05	Slc6a7
ENSMUSG00000003469	427.759	-1.11307	0.231129	-4.81579	1.46616e-06	1.1734e-05	Phyhip
ENSMUSG00000046223	119.087	1.67509	0.349258	4.79615	1.61744e-06	1.28931e-05	Plaur
ENSMUSG00000032717	113.46	1.23083	0.256694	4.79495	1.62715e-06	1.29601e-05	Mdfi
ENSMUSG00000005413	637.481	2.48932	0.519179	4.79472	1.62903e-06	1.297e-05	Hmox1
ENSMUSG00000035649	183.795	1.07188	0.223989	4.78542	1.70634e-06	1.3537e-05	Zcchc7
ENSMUSG00000029925	89.4793	1.19842	0.250596	4.78228	1.73321e-06	1.37338e-05	Tbxas1
ENSMUSG00000025161	201.843	2.61507	0.546873	4.78186	1.73683e-06	1.37571e-05	Slc16a3
ENSMUSG00000139315	32.008	2.84241	0.594558	4.78071	1.74676e-06	1.38248e-05	NA
ENSMUSG00000045777	59.0616	1.62613	0.340454	4.77636	1.78493e-06	1.41045e-05	Ifitm10
ENSMUSG00000045763	88.4984	1.329	0.278305	4.77535	1.79398e-06	1.41705e-05	Basp1
ENSMUSG00000120796	17.1651	-2.7063	0.566783	-4.77483	1.79855e-06	1.4201e-05	NA
ENSMUSG00000020733	166.22	1.01783	0.213303	4.77174	1.82638e-06	1.4398e-05	Nherf1
ENSMUSG00000023267	17.0734	-2.47965	0.519867	-4.76978	1.84429e-06	1.45334e-05	Gabrr2
ENSMUSG00000042340	123.98	-1.51604	0.318165	-4.76496	1.88894e-06	1.48502e-05	Ctf1
ENSMUSG00000047592	23.1889	2.30143	0.483545	4.75951	1.94066e-06	1.52268e-05	Nxpe5
ENSMUSG00000031023	185.477	1.03021	0.216645	4.75532	1.9813e-06	1.55275e-05	Akip1
ENSMUSG00000026068	17.1657	3.12049	0.656657	4.75209	2.01328e-06	1.57534e-05	Il18rap
ENSMUSG00000087165	22.9959	2.23737	0.470991	4.75035	2.03067e-06	1.5877e-05	2010001A14Rik
ENSMUSG00000021226	1140.8	-1.21175	0.255378	-4.74492	2.08593e-06	1.629e-05	Acot2
ENSMUSG00000085643	43.4115	-1.77544	0.374223	-4.74433	2.09194e-06	1.63305e-05	Gm12519
ENSMUSG00000068417	13.1056	3.28652	0.693016	4.74234	2.11267e-06	1.64795e-05	Pnp2
ENSMUSG00000026986	122.812	-1.33239	0.281163	-4.73885	2.14938e-06	1.67593e-05	Hnmt
ENSMUSG00000097048	86.4552	1.26613	0.267312	4.73652	2.17422e-06	1.69464e-05	1600020E01Rik
ENSMUSG00000026435	153.88	1.43506	0.303208	4.73294	2.21294e-06	1.7228e-05	Slc45a3
ENSMUSG00000022181	13.4598	3.95722	0.83653	4.73052	2.23948e-06	1.74143e-05	C6
ENSMUSG00000066861	31.6707	2.08389	0.440659	4.72902	2.25605e-06	1.75363e-05	Oas1g
ENSMUSG00000027368	12.4617	3.38906	0.717049	4.7264	2.28533e-06	1.77501e-05	Dusp2
ENSMUSG00000110161	20.7166	-2.06964	0.438037	-4.72481	2.30332e-06	1.7876e-05	NA
ENSMUSG00000032397	147.477	1.00709	0.21328	4.72191	2.33644e-06	1.8126e-05	Tipin
ENSMUSG00000003882	28.0257	2.45616	0.521079	4.7136	2.43379e-06	1.88374e-05	Il7r
ENSMUSG00000063011	319.552	1.50756	0.320313	4.70652	2.51984e-06	1.94507e-05	Msln
ENSMUSG00000055963	82.4814	1.45912	0.310624	4.69739	2.6351e-06	2.027e-05	Triqk
ENSMUSG00000031994	342.126	2.79544	0.5964	4.68719	2.76988e-06	2.1217e-05	Adamts8
ENSMUSG00000046807	47.4345	1.60245	0.342204	4.68274	2.83064e-06	2.16658e-05	Lrrc75b
ENSMUSG00000036469	43.6782	1.62596	0.347421	4.68008	2.8677e-06	2.19327e-05	Marchf1
ENSMUSG00000115678	15.5577	2.96781	0.635479	4.6702	3.0091e-06	2.29702e-05	Gm49212
ENSMUSG00000029022	183.681	1.08038	0.231414	4.66861	3.03243e-06	2.31307e-05	Miip
ENSMUSG00000132590	18.5204	2.23204	0.47834	4.66623	3.06777e-06	2.33646e-05	NA
ENSMUSG00000028211	294.618	1.24701	0.267249	4.6661	3.06974e-06	2.33707e-05	Trp53inp1
ENSMUSG00000032942	191.373	-1.64859	0.35358	-4.66256	3.12293e-06	2.37575e-05	Ucp3
ENSMUSG00000024270	182.707	1.07865	0.231517	4.65906	3.17664e-06	2.41477e-05	Slc39a6
ENSMUSG00000003355	88.4327	1.43384	0.308288	4.65098	3.30362e-06	2.50179e-05	Fkbp11
ENSMUSG00000040699	147.793	1.04517	0.224994	4.64532	3.39556e-06	2.56851e-05	Limd2
ENSMUSG00000053024	336.938	1.19364	0.257103	4.64266	3.43946e-06	2.59974e-05	Cntn2
ENSMUSG00000079597	7.6907	6.27042	1.35105	4.64113	3.46515e-06	2.61619e-05	Cstdc4
ENSMUSG00000003665	18.8447	3.53509	0.761681	4.64118	3.46431e-06	2.61619e-05	Has1
ENSMUSG00000141548	21.8039	-2.06125	0.444241	-4.63993	3.4853e-06	2.62987e-05	NA
ENSMUSG00000116056	78.5047	-1.51066	0.32558	-4.63989	3.4859e-06	2.62987e-05	Gm4544
ENSMUSG00000027555	34.6237	1.69973	0.36689	4.63282	3.60724e-06	2.71323e-05	Car13
ENSMUSG00000023176	6.5112	-5.53079	1.19389	-4.63258	3.61137e-06	2.71532e-05	Cpn2
ENSMUSG00000045672	112.065	1.33238	0.287655	4.63188	3.62365e-06	2.72353e-05	Col27a1
ENSMUSG00000017390	13.8681	2.78519	0.601716	4.62874	3.679e-06	2.76201e-05	Aldoc
ENSMUSG00000055407	227.18	1.12144	0.242375	4.62691	3.71167e-06	2.78549e-05	Map6
ENSMUSG00000040254	153.035	1.39318	0.301591	4.61944	3.84783e-06	2.88227e-05	Sema3d
ENSMUSG00000044768	89.9776	1.11773	0.242183	4.61522	3.92688e-06	2.93598e-05	Macir
ENSMUSG00000007594	12.8713	3.46321	0.750498	4.61455	3.93954e-06	2.94325e-05	Hapln4
ENSMUSG00000027239	119.727	1.06753	0.231346	4.61445	3.94146e-06	2.94358e-05	Mdk
ENSMUSG00000033114	38.4571	1.48057	0.321047	4.6117	3.99392e-06	2.97943e-05	Slc35d2
ENSMUSG00000038201	89.1947	-1.02417	0.22211	-4.61108	4.00579e-06	2.98605e-05	Kcna7
ENSMUSG00000028553	18.7145	-2.16937	0.470811	-4.60774	4.07062e-06	3.02649e-05	Angptl3
ENSMUSG00000066809	32.6273	2.00866	0.435971	4.60733	4.07865e-06	3.03133e-05	NA
ENSMUSG00000040093	129.324	1.07917	0.234552	4.60097	4.20522e-06	3.11861e-05	Bmf
ENSMUSG00000025437	117.299	-1.08074	0.235064	-4.59765	4.27279e-06	3.16386e-05	Usp33
ENSMUSG00000009292	17.3806	2.27261	0.49483	4.5927	4.37554e-06	3.23755e-05	Trpm2
ENSMUSG00000038217	35.9896	-1.39738	0.304325	-4.59174	4.39576e-06	3.2513e-05	Tlcd2
ENSMUSG00000061100	100.857	-1.80325	0.392822	-4.59049	4.42203e-06	3.26803e-05	Retnla
ENSMUSG00000060131	26.7879	1.76679	0.384922	4.58999	4.43269e-06	3.27377e-05	Atp8b4
ENSMUSG00000085945	59.3303	1.29306	0.282654	4.5747	4.76895e-06	3.50787e-05	NA
ENSMUSG00000075408	123.218	3.51357	0.768119	4.57426	4.77914e-06	3.51278e-05	Smim41
ENSMUSG00000026679	38.9324	1.84921	0.404474	4.5719	4.83318e-06	3.5512e-05	Enkur
ENSMUSG00000060470	51.0754	1.29095	0.282631	4.56762	4.93304e-06	3.62058e-05	Adgrg3
ENSMUSG00000031351	52.0676	1.40458	0.307535	4.5672	4.94277e-06	3.62639e-05	Zfp185
ENSMUSG00000030124	38.8181	2.0459	0.448064	4.56609	4.96898e-06	3.64428e-05	Lag3
ENSMUSG00000112831	37.6625	1.89467	0.415016	4.56529	4.98802e-06	3.65691e-05	Gm35533
ENSMUSG00000040113	9.85141	-5.40055	1.18354	-4.56305	5.04168e-06	3.69489e-05	Ntmt2
ENSMUSG00000041801	609.625	1.01737	0.223073	4.56069	5.09853e-06	3.73109e-05	Phlda3
ENSMUSG00000054206	30.6212	-1.73247	0.380131	-4.55756	5.17502e-06	3.77876e-05	Gzmm
ENSMUSG00000120897	8.58364	-3.8114	0.836569	-4.55599	5.21386e-06	3.80574e-05	NA
ENSMUSG00000023259	157.764	-1.25601	0.275801	-4.55406	5.26211e-06	3.83676e-05	Slc26a6
ENSMUSG00000132140	15.3168	2.50826	0.550861	4.55335	5.27987e-06	3.8483e-05	NA
ENSMUSG00000099858	16.3419	-2.40895	0.529091	-4.55299	5.28887e-06	3.85346e-05	Gm6652
ENSMUSG00000024713	87.7546	1.20076	0.263797	4.55182	5.31829e-06	3.87207e-05	Pcsk5
ENSMUSG00000021799	37.1124	-2.1469	0.472004	-4.54846	5.40388e-06	3.93152e-05	Opn4
ENSMUSG00000074802	42.4965	1.39153	0.305965	4.54802	5.41542e-06	3.93706e-05	Gas2l3
ENSMUSG00000111867	107.291	-1.00368	0.220883	-4.54393	5.52143e-06	4.01267e-05	Gm31013
ENSMUSG00000025036	74.6872	1.19885	0.264254	4.53674	5.71301e-06	4.14286e-05	Sfxn2
ENSMUSG00000053113	160.709	1.68599	0.371672	4.53624	5.72669e-06	4.15128e-05	Socs3
ENSMUSG00000049907	944.203	1.06859	0.235624	4.53513	5.75677e-06	4.17157e-05	Rasl11b
ENSMUSG00000114309	11.0235	-2.95946	0.653092	-4.53146	5.85767e-06	4.24008e-05	NA
ENSMUSG00000115049	137.182	1.03447	0.228377	4.52968	5.90717e-06	4.27282e-05	NA
ENSMUSG00000042428	85.9617	-1.14152	0.252206	-4.52612	6.00756e-06	4.33915e-05	Mgat3
ENSMUSG00000027713	10.1544	3.29143	0.728202	4.51994	6.18557e-06	4.46612e-05	1810062G17Rik
ENSMUSG00000055923	107.59	-1.06156	0.235043	-4.51645	6.28841e-06	4.53394e-05	Aasdh
ENSMUSG00000044231	142.272	-1.08835	0.241026	-4.51548	6.31732e-06	4.55138e-05	Nhlrc1
ENSMUSG00000040648	847.148	-1.14459	0.25363	-4.51284	6.39662e-06	4.60023e-05	Ppip5k2
ENSMUSG00000086843	13.3783	-3.01323	0.668066	-4.51038	6.47107e-06	4.65043e-05	E030013I19Rik
ENSMUSG00000037594	107.869	1.14478	0.253872	4.50928	6.50489e-06	4.67137e-05	Clba1
ENSMUSG00000138589	16.0393	3.14766	0.698216	4.50815	6.53967e-06	4.69298e-05	NA
ENSMUSG00000042766	36.9513	1.40681	0.312166	4.50663	6.58653e-06	4.72322e-05	Trim46
ENSMUSG00000026429	31.5617	-1.7109	0.37974	-4.50546	6.62293e-06	4.74592e-05	Ube2t
ENSMUSG00000045102	28.6529	-2.06199	0.457695	-4.50516	6.63224e-06	4.75089e-05	Poln
ENSMUSG00000020546	59.7445	-1.09365	0.2434	-4.49322	7.01534e-06	5.01096e-05	Stxbp4
ENSMUSG00000033213	10.541	5.24272	1.16723	4.49158	7.06973e-06	5.0426e-05	AA467197
ENSMUSG00000128770	13.5649	3.99667	0.890103	4.49012	7.11843e-06	5.07191e-05	NA
ENSMUSG00000004933	29.0961	1.64799	0.367057	4.48974	7.13089e-06	5.07718e-05	Matk
ENSMUSG00000085614	63.5943	-1.22902	0.273806	-4.48864	7.16803e-06	5.09817e-05	1700123M08Rik
ENSMUSG00000082536	78.4841	1.27056	0.283162	4.48702	7.2227e-06	5.1334e-05	NA
ENSMUSG00000032105	83.234	-1.02001	0.227505	-4.48346	7.34413e-06	5.2123e-05	Nherf4
ENSMUSG00000021222	183.706	-1.11354	0.248507	-4.48092	7.43205e-06	5.27096e-05	Dcaf4
ENSMUSG00000001348	56.094	1.74446	0.389329	4.48069	7.44019e-06	5.27486e-05	Acp5
ENSMUSG00000023232	28.2798	2.08591	0.465766	4.47844	7.51905e-06	5.31758e-05	Serinc2
ENSMUSG00000020623	57.0341	-1.29057	0.288584	-4.47209	7.74594e-06	5.4633e-05	Map2k6
ENSMUSG00000024235	77.8378	1.07514	0.240417	4.47198	7.74969e-06	5.4633e-05	Map3k8
ENSMUSG00000045136	118.012	1.30177	0.29116	4.47097	7.78655e-06	5.48565e-05	Tubb2b
ENSMUSG00000059049	14.5296	2.74855	0.614866	4.47016	7.81606e-06	5.50427e-05	Frem1
ENSMUSG00000025037	122.367	1.03204	0.230902	4.4696	7.83662e-06	5.5168e-05	Maoa
ENSMUSG00000041695	360.809	-1.29997	0.290861	-4.46938	7.84482e-06	5.51927e-05	Kcnj2
ENSMUSG00000014813	76.3926	1.77942	0.398755	4.46245	8.1028e-06	5.68653e-05	Stc1
ENSMUSG00000085704	65.9883	-1.07601	0.241152	-4.46196	8.12147e-06	5.69528e-05	4921531C22Rik
ENSMUSG00000028410	986.672	-1.01468	0.227448	-4.46113	8.15304e-06	5.71141e-05	Dnaja1
ENSMUSG00000092035	42.6433	1.46057	0.328046	4.45232	8.49488e-06	5.93011e-05	Peg10
ENSMUSG00000024085	515.859	1.01825	0.228844	4.44953	8.6057e-06	6.00328e-05	Man2a1
ENSMUSG00000123604	92.1681	-1.64519	0.370206	-4.44398	8.8311e-06	6.14979e-05	NA
ENSMUSG00000053025	32.6483	1.55799	0.350921	4.43972	9.00749e-06	6.2639e-05	Sv2b
ENSMUSG00000029348	41.866	1.41478	0.318789	4.43799	9.08031e-06	6.31015e-05	Asphd2
ENSMUSG00000055639	127.932	-1.03565	0.233391	-4.43743	9.10381e-06	6.32209e-05	Dach1
ENSMUSG00000060224	40.613	1.79918	0.405501	4.43693	9.1252e-06	6.33475e-05	Pyroxd2
ENSMUSG00000030731	56.9928	-1.39685	0.314939	-4.43529	9.19464e-06	6.37852e-05	Syt3
ENSMUSG00000058809	18.5831	-2.0839	0.469981	-4.434	9.25007e-06	6.41252e-05	NA
ENSMUSG00000015452	11.4897	2.75343	0.621081	4.43328	9.2811e-06	6.43181e-05	Ager
ENSMUSG00000005089	26.6391	1.76007	0.397062	4.43273	9.30456e-06	6.44584e-05	Slc1a2
ENSMUSG00000049044	332.863	-1.00816	0.227493	-4.4316	9.35362e-06	6.47757e-05	Rapgef4
ENSMUSG00000035967	206.255	1.04556	0.23595	4.43128	9.36733e-06	6.48482e-05	Ints6l
ENSMUSG00000050382	42.5632	1.38898	0.313965	4.42399	9.68949e-06	6.68933e-05	Kif7
ENSMUSG00000038425	41.9706	1.33661	0.30218	4.42324	9.72312e-06	6.71023e-05	Poli
ENSMUSG00000024300	158.136	1.31696	0.297984	4.41956	9.88998e-06	6.82068e-05	Myo1f
ENSMUSG00000044689	10.8561	5.28505	1.19599	4.41898	9.91692e-06	6.83454e-05	NA
ENSMUSG00000030577	21.4362	2.17015	0.4912	4.41806	9.95923e-06	6.85897e-05	Cd22
ENSMUSG00000075012	39.8468	1.59945	0.362386	4.41368	1.0163e-05	6.98485e-05	Fjx1
ENSMUSG00000015355	68.3194	1.39627	0.316422	4.41269	1.02096e-05	7.01449e-05	Cd48
ENSMUSG00000112800	14.8651	-2.30508	0.522605	-4.41075	1.03011e-05	7.06037e-05	Gm40604
ENSMUSG00000115882	13.6609	2.4069	0.545877	4.40923	1.03738e-05	7.10533e-05	NA
ENSMUSG00000140700	590.813	2.5745	0.584299	4.40614	1.0523e-05	7.19274e-05	NA
ENSMUSG00000117628	14.6414	2.52284	0.572669	4.4054	1.05588e-05	7.21397e-05	NA
ENSMUSG00000025269	69.0869	-1.11983	0.254538	-4.39944	1.08529e-05	7.40815e-05	Apex2
ENSMUSG00000047945	254.397	1.13065	0.257031	4.39889	1.08805e-05	7.42444e-05	Marcksl1
ENSMUSG00000024891	152.854	-1.13438	0.257894	-4.39861	1.08944e-05	7.42887e-05	Slc29a2
ENSMUSG00000042684	47.4054	1.89806	0.431731	4.3964	1.10062e-05	7.49999e-05	Npl
ENSMUSG00000121135	22.71	1.92854	0.438722	4.39581	1.10359e-05	7.51764e-05	Hmga2-ps1
ENSMUSG00000103409	152.927	-1.30393	0.29697	-4.39077	1.1295e-05	7.68104e-05	Lsmem2
ENSMUSG00000020407	142.142	1.19043	0.271319	4.38756	1.14632e-05	7.7822e-05	Upp1
ENSMUSG00000060063	54.4294	1.53377	0.349581	4.38744	1.1469e-05	7.78353e-05	Alox5ap
ENSMUSG00000048485	12.0301	3.15008	0.718603	4.38361	1.16727e-05	7.91104e-05	Zbtb8b
ENSMUSG00000024013	92.1889	1.38579	0.316417	4.37963	1.18879e-05	8.04599e-05	Fgd2
ENSMUSG00000039760	5.67217	5.82952	1.33181	4.37715	1.20243e-05	8.13554e-05	Il22ra2
ENSMUSG00000027843	30.6573	1.74366	0.398573	4.37476	1.21564e-05	8.21103e-05	Ptpn22
ENSMUSG00000043090	148.728	-1.06792	0.24415	-4.37403	1.21976e-05	8.23603e-05	Zfp866
ENSMUSG00000035189	95.9374	-1.06835	0.244347	-4.37229	1.22951e-05	8.29911e-05	Ano4
ENSMUSG00000025355	56.9049	1.07854	0.246785	4.37036	1.24042e-05	8.36146e-05	Mmp19
ENSMUSG00000029343	17.2428	-2.42134	0.554702	-4.36511	1.2706e-05	8.53898e-05	Crybb1
ENSMUSG00000067818	3328.14	1.58397	0.362901	4.36475	1.27268e-05	8.55011e-05	Myl9
ENSMUSG00000009092	11.7701	2.94808	0.67549	4.36436	1.27495e-05	8.56245e-05	Derl3
ENSMUSG00000057596	55.727	1.53203	0.351101	4.36352	1.27988e-05	8.58695e-05	Trim30d
ENSMUSG00000051147	30.7547	1.48375	0.340296	4.36018	1.29956e-05	8.71019e-05	Nat2
ENSMUSG00000021379	56.059	1.48097	0.339713	4.35948	1.30371e-05	8.73506e-05	Id4
ENSMUSG00000036437	78.947	-1.19206	0.27354	-4.35788	1.31328e-05	8.79328e-05	Npy1r
ENSMUSG00000024471	497.201	-1.03135	0.236672	-4.35772	1.31427e-05	8.79701e-05	Myot
ENSMUSG00000003484	44.8124	1.88651	0.43293	4.35753	1.31536e-05	8.80133e-05	Cyp4f18
ENSMUSG00000115317	25.4038	2.03096	0.466147	4.35691	1.3191e-05	8.82047e-05	Gm32618
ENSMUSG00000121489	76.5173	-1.69817	0.389868	-4.35577	1.32599e-05	8.86062e-05	1810014B01Rik
ENSMUSG00000032013	15.2174	4.74804	1.09015	4.3554	1.32826e-05	8.8728e-05	Trim29
ENSMUSG00000141852	4.20733	-5.64902	1.29779	-4.35281	1.34404e-05	8.97224e-05	NA
ENSMUSG00000052516	11.6179	-2.8959	0.665592	-4.35086	1.35603e-05	9.04019e-05	Robo2
ENSMUSG00000063611	38.6658	1.60265	0.36858	4.34819	1.37267e-05	9.14198e-05	NA
ENSMUSG00000098188	55.0597	1.10368	0.253869	4.34744	1.37737e-05	9.17024e-05	Sowahc
ENSMUSG00000050296	71.371	-1.98219	0.456191	-4.3451	1.39214e-05	9.2624e-05	Abca12
ENSMUSG00000056476	36.0944	-1.42884	0.328853	-4.34492	1.39324e-05	9.26665e-05	Med12l
ENSMUSG00000131103	51.997	-1.18888	0.27365	-4.34452	1.39579e-05	9.28049e-05	NA
ENSMUSG00000068079	473.909	-1.01908	0.234661	-4.3428	1.40679e-05	9.35058e-05	Tcf15
ENSMUSG00000138260	27.1427	-1.72883	0.398108	-4.34262	1.40794e-05	9.35511e-05	NA
ENSMUSG00000050621	57.6281	1.21671	0.280196	4.34235	1.40965e-05	9.36331e-05	Rps27rt
ENSMUSG00000085295	11.5826	5.3848	1.24113	4.33864	1.43365e-05	9.51646e-05	NA
ENSMUSG00000028125	71.5589	-1.54136	0.355946	-4.33033	1.48888e-05	9.85358e-05	Abca4
ENSMUSG00000073590	42.7439	-1.23813	0.286163	-4.32667	1.51379e-05	0.000100052	3222401L13Rik
ENSMUSG00000003949	428.975	-1.3104	0.303261	-4.32104	1.55295e-05	0.000102471	Hlf
ENSMUSG00000078771	82.4246	1.93868	0.448869	4.31904	1.5671e-05	0.000103302	Evi2a
ENSMUSG00000070604	53.8898	1.24061	0.287367	4.31719	1.58032e-05	0.000104071	Vsig10l
ENSMUSG00000028007	217.458	1.04074	0.241254	4.31388	1.60416e-05	0.000105571	Snx7
ENSMUSG00000020105	52.6678	1.4482	0.335757	4.31323	1.60888e-05	0.000105812	Lrig3
ENSMUSG00000135923	8.43907	3.86575	0.896655	4.3113	1.62297e-05	0.000106634	Rbm3-ps
ENSMUSG00000132420	39.2013	-1.56016	0.361936	-4.3106	1.62814e-05	0.000106939	NA
ENSMUSG00000046185	106.975	-1.09979	0.255246	-4.30875	1.64181e-05	0.00010773	Zfp84
ENSMUSG00000026271	26.4423	2.04983	0.476128	4.30521	1.66826e-05	0.000109287	Gpr35
ENSMUSG00000020672	18.9247	2.13831	0.497184	4.30085	1.70146e-05	0.000111243	Sntg2
ENSMUSG00000102852	8.4401	3.86787	0.90016	4.29687	1.73227e-05	0.000113109	NA
ENSMUSG00000045545	15.5652	3.23934	0.754418	4.29382	1.75625e-05	0.000114526	Krt14
ENSMUSG00000022945	22.8686	1.94483	0.453001	4.29322	1.76098e-05	0.000114759	Chaf1b
ENSMUSG00000045201	347.983	-1.03472	0.241235	-4.28925	1.79275e-05	0.000116716	Lrrc3b
ENSMUSG00000072949	319.667	-1.27267	0.296743	-4.28881	1.79634e-05	0.000116873	Acot1
ENSMUSG00000038884	100.399	1.05438	0.2459	4.28784	1.80417e-05	0.000117344	Shfl
ENSMUSG00000051606	42.3106	-1.97185	0.459908	-4.28749	1.807e-05	0.000117491	E030046B03Rik
ENSMUSG00000064308	3.91006	-5.54512	1.29395	-4.28541	1.82403e-05	0.000118559	2410137M14Rik
ENSMUSG00000138348	9.14848	-2.97983	0.695373	-4.28523	1.8255e-05	0.000118577	NA
ENSMUSG00000033405	54.0317	-1.67366	0.390705	-4.28369	1.83816e-05	0.000119322	Nudt15
ENSMUSG00000030735	22.4611	-1.6439	0.383964	-4.28139	1.85731e-05	0.000120526	Gm9755
ENSMUSG00000022871	26.0157	1.88488	0.440747	4.27656	1.89807e-05	0.000123052	Fetub
ENSMUSG00000037661	38.5508	1.45235	0.339652	4.276	1.90281e-05	0.000123319	Gpr160
ENSMUSG00000072902	117.303	-1.63989	0.383636	-4.27461	1.91474e-05	0.000123971	NA
ENSMUSG00000062585	23.3217	1.67494	0.391846	4.27449	1.91579e-05	0.000124	Cnr2
ENSMUSG00000025175	266.44	-1.0025	0.234937	-4.26711	1.98024e-05	0.000128047	Fn3k
ENSMUSG00000035506	36.7922	1.60705	0.376611	4.26714	1.97999e-05	0.000128047	Slc12a8
ENSMUSG00000022488	217.7	1.0525	0.246915	4.2626	2.02062e-05	0.000130321	Nckap1l
ENSMUSG00000045251	75.9823	1.20768	0.283455	4.26056	2.03916e-05	0.000131474	Zfp688
ENSMUSG00000099974	15.9661	2.57055	0.603819	4.25715	2.07049e-05	0.000133279	Bcl2a1d
ENSMUSG00000117029	12.4929	-3.15755	0.741758	-4.25685	2.07329e-05	0.000133416	Gm36201
ENSMUSG00000072115	52.7124	1.26327	0.296768	4.25677	2.07404e-05	0.000133422	Ang
ENSMUSG00000045087	21.2582	-1.88302	0.442493	-4.25548	2.08598e-05	0.000134146	S1pr5
ENSMUSG00000042622	285.481	2.18053	0.512688	4.25314	2.10791e-05	0.000135426	Maff
ENSMUSG00000061080	22.1809	-2.21523	0.5212	-4.25026	2.13527e-05	0.00013692	Lsamp
ENSMUSG00000072235	1938.42	1.07186	0.252421	4.2463	2.1733e-05	0.000139136	Tuba1a
ENSMUSG00000038618	37.1265	1.85402	0.43672	4.24533	2.18276e-05	0.000139697	Rassf7
ENSMUSG00000097652	293.024	-1.3208	0.31132	-4.24258	2.20961e-05	0.000141234	Mhrt
ENSMUSG00000127251	735.028	1.76466	0.416776	4.23408	2.2949e-05	0.000146405	NA
ENSMUSG00000031736	108.209	1.15136	0.272138	4.23081	2.32853e-05	0.000148409	Crnde
ENSMUSG00000061894	66.9869	-1.22749	0.290486	-4.22564	2.38259e-05	0.000151613	Zscan20
ENSMUSG00000054978	43.3803	-2.29986	0.544692	-4.22231	2.4181e-05	0.000153506	Kbtbd13
ENSMUSG00000021886	32.7755	2.10983	0.499689	4.22228	2.41848e-05	0.000153506	Gpr65
ENSMUSG00000026344	14.7106	2.63594	0.624873	4.21836	2.46089e-05	0.000156	Lypd1
ENSMUSG00000026770	22.8113	-2.10147	0.498173	-4.21836	2.46087e-05	0.000156	Il2ra
ENSMUSG00000026768	178.355	-1.0771	0.255408	-4.21717	2.47387e-05	0.000156673	Itga8
ENSMUSG00000026070	19.0266	2.0035	0.475296	4.21527	2.49479e-05	0.000157748	Il18r1
ENSMUSG00000036492	34.4514	1.51837	0.360223	4.2151	2.49671e-05	0.000157808	Rnf39
ENSMUSG00000022148	33.353	1.55033	0.368022	4.21261	2.5244e-05	0.000159368	Fyb1
ENSMUSG00000020734	120.221	1.06594	0.253241	4.2092	2.56272e-05	0.000161482	Grin2c
ENSMUSG00000101872	74.5364	-1.10789	0.263219	-4.209	2.56504e-05	0.000161578	NA
ENSMUSG00000037921	63.8194	1.86558	0.443404	4.2074	2.58326e-05	0.000162623	Ddx60
ENSMUSG00000027360	78.6865	1.54034	0.366196	4.20632	2.59565e-05	0.000163351	Hdc
ENSMUSG00000073802	20.1028	2.16196	0.514067	4.20559	2.60402e-05	0.000163826	Cdkn2b
ENSMUSG00000033849	85.0574	-1.45936	0.347123	-4.20414	2.62071e-05	0.000164773	B3galt2
ENSMUSG00000036856	23.3672	1.97148	0.468988	4.2037	2.62591e-05	0.000164996	Wnt4
ENSMUSG00000036353	47.518	1.22146	0.29084	4.19979	2.67169e-05	0.000167661	P2ry12
ENSMUSG00000117916	106.144	-1.26657	0.301784	-4.19693	2.70561e-05	0.00016963	9630028I04Rik
ENSMUSG00000039903	56.5991	1.48202	0.353296	4.19485	2.73053e-05	0.000171086	Eva1c
ENSMUSG00000090386	130.375	1.02629	0.244887	4.19087	2.77882e-05	0.000173731	Mir99ahg
ENSMUSG00000036913	75.1644	1.7161	0.409683	4.18885	2.80375e-05	0.00017507	Trim67
ENSMUSG00000138591	12.1618	3.16296	0.755122	4.18867	2.8059e-05	0.000175123	NA
ENSMUSG00000033508	11.3902	3.06565	0.731921	4.1885	2.80809e-05	0.000175123	Asprv1
ENSMUSG00000052151	70.0773	1.06546	0.254426	4.18771	2.81782e-05	0.000175675	Plpp2
ENSMUSG00000027514	65.8533	1.80409	0.43096	4.18621	2.83656e-05	0.000176788	Zbp1
ENSMUSG00000079227	86.5006	1.45895	0.348637	4.18472	2.85513e-05	0.000177763	Ccr5
ENSMUSG00000073771	45.7581	1.17237	0.280491	4.17972	2.91873e-05	0.0001814	Btbd19
ENSMUSG00000112376	28.7466	1.77137	0.423899	4.17875	2.93117e-05	0.000182082	Gm19395
ENSMUSG00000055865	27.9371	-1.59392	0.38146	-4.17848	2.93462e-05	0.000182162	Tafa3
ENSMUSG00000066361	26.3587	2.8886	0.691404	4.17788	2.9424e-05	0.000182531	Serpina3c
ENSMUSG00000057378	49.8261	1.39441	0.333837	4.1769	2.95506e-05	0.000183259	Ryr3
ENSMUSG00000107019	25.7539	2.01564	0.482753	4.17531	2.97583e-05	0.000184433	NA
ENSMUSG00000109587	47.5231	-1.34033	0.321101	-4.17417	2.99075e-05	0.000185243	NA
ENSMUSG00000050808	4.08466	5.35916	1.2855	4.16893	3.06028e-05	0.000189198	Muc15
ENSMUSG00000059657	12.3855	4.87781	1.17022	4.16828	3.0691e-05	0.000189685	Stfa2l1
ENSMUSG00000097617	51.7057	1.23755	0.29693	4.16782	3.07532e-05	0.000189952	NA
ENSMUSG00000040751	28.8894	2.70507	0.649054	4.16772	3.07668e-05	0.000189977	Lat2
ENSMUSG00000007279	163.065	-1.03279	0.24794	-4.16551	3.10664e-05	0.000191472	Scube2
ENSMUSG00000047878	105.424	1.12282	0.269645	4.16407	3.12623e-05	0.000192501	A4galt
ENSMUSG00000141186	3.88565	-5.53758	1.33041	-4.1623	3.15052e-05	0.000193699	NA
ENSMUSG00000001986	47.3841	1.34868	0.324106	4.16124	3.16528e-05	0.000194547	Gria3
ENSMUSG00000006395	155.036	1.54123	0.370881	4.15559	3.24451e-05	0.000199111	Hyi
ENSMUSG00000028327	3.97639	5.32011	1.28111	4.15274	3.28518e-05	0.000201421	Stra6l
ENSMUSG00000123644	23.3602	-1.7413	0.419328	-4.1526	3.28719e-05	0.000201482	Gm42288
ENSMUSG00000061048	24.7644	1.97397	0.475381	4.1524	3.29001e-05	0.000201594	Cdh3
ENSMUSG00000072893	47.9599	1.3779	0.331985	4.15049	3.31763e-05	0.000203162	4933439C10Rik
ENSMUSG00000123065	9.80324	-2.77962	0.670028	-4.1485	3.34655e-05	0.00020487	NA
ENSMUSG00000068794	31.5936	1.40336	0.338479	4.14608	3.3821e-05	0.000206983	Col28a1
ENSMUSG00000051984	159.684	-1.11645	0.269705	-4.13954	3.48005e-05	0.000212522	Sec31b
ENSMUSG00000093759	9.38837	4.01932	0.971084	4.139	3.48817e-05	0.000212953	NA
ENSMUSG00000039714	4.71801	5.56449	1.34443	4.13892	3.48945e-05	0.000212966	Cplx3
ENSMUSG00000049526	15.3097	2.05083	0.496134	4.13361	3.57104e-05	0.000217747	Tmem202
ENSMUSG00000080921	73.6879	1.17159	0.283507	4.1325	3.58845e-05	0.000218542	NA
ENSMUSG00000028194	204.604	1.4103	0.341366	4.13133	3.60669e-05	0.000219586	Ddah1
ENSMUSG00000032680	47.4639	-1.23108	0.298035	-4.13066	3.61731e-05	0.000220098	6820408C15Rik
ENSMUSG00000032514	4.61507	5.5321	1.33948	4.13003	3.62722e-05	0.000220567	Ttc21a
ENSMUSG00000028859	102.342	2.6879	0.650927	4.12934	3.63802e-05	0.000221156	Csf3r
ENSMUSG00000026343	15.7651	2.36493	0.573799	4.12152	3.76382e-05	0.000228041	Gpr39
ENSMUSG00000031861	22.9109	1.69462	0.411204	4.12113	3.77026e-05	0.000228362	Lpar2
ENSMUSG00000068115	51.1609	1.17275	0.284681	4.11954	3.79634e-05	0.000229803	Ninl
ENSMUSG00000100594	31.1628	-1.58647	0.385163	-4.11895	3.80599e-05	0.000230317	2810414N06Rik
ENSMUSG00000034795	51.0343	1.19741	0.290728	4.11867	3.81072e-05	0.000230534	Ccdc122
ENSMUSG00000050493	20.6873	1.86901	0.454067	4.11616	3.85241e-05	0.000232985	Fam167b
ENSMUSG00000039470	115.432	1.09939	0.267111	4.11586	3.85741e-05	0.000233147	Zdhhc2
ENSMUSG00000043719	86.8579	-1.68086	0.408777	-4.11192	3.92388e-05	0.000236664	Col6a6
ENSMUSG00000086825	33.1443	2.15753	0.524767	4.11141	3.93248e-05	0.000237039	NA
ENSMUSG00000142744	9.02521	-3.35393	0.8168	-4.10618	4.02253e-05	0.000241739	NA
ENSMUSG00000043300	66.7878	1.15192	0.280567	4.10567	4.03137e-05	0.000242197	B3galnt1
ENSMUSG00000047104	5.37648	5.75421	1.40161	4.10542	4.03579e-05	0.00024239	Pbp2
ENSMUSG00000097740	6.83348	-4.24884	1.03568	-4.10245	4.08806e-05	0.000245161	E030044B06Rik
ENSMUSG00000022041	18.2372	-2.06573	0.503723	-4.10092	4.11517e-05	0.000246565	Chrna2
ENSMUSG00000129838	8.80432	-3.1304	0.763377	-4.10073	4.11851e-05	0.000246634	NA
ENSMUSG00000031936	11.3922	5.35423	1.30765	4.09456	4.22978e-05	0.000252902	Hephl1
ENSMUSG00000037035	110.707	1.46282	0.35733	4.09377	4.24421e-05	0.000253537	Inhbb
ENSMUSG00000024903	6.01473	5.15955	1.26058	4.09298	4.25859e-05	0.000254244	Lao1
ENSMUSG00000099812	4.0178	5.33262	1.3033	4.09163	4.28344e-05	0.000255651	NA
ENSMUSG00000091475	32.1681	1.32001	0.322726	4.09019	4.3102e-05	0.000257019	Cerox1
ENSMUSG00000041515	264.427	1.01563	0.248317	4.09006	4.31256e-05	0.000257082	Irf8
ENSMUSG00000043857	27.2621	1.67915	0.410656	4.08895	4.33326e-05	0.00025824	Mgat5b
ENSMUSG00000026778	55.9996	-1.43716	0.351532	-4.08827	4.3461e-05	0.000258928	Prkcq
ENSMUSG00000102418	11.9018	3.11658	0.763148	4.08384	4.42969e-05	0.000263672	Sh2d1b1
ENSMUSG00000019853	46.72	1.1965	0.293203	4.0808	4.48809e-05	0.000266751	Hebp2
ENSMUSG00000085156	36.3193	1.48885	0.364853	4.08068	4.49041e-05	0.00026681	Snhg15
ENSMUSG00000085218	88.4591	-1.41823	0.347644	-4.07955	4.51223e-05	0.000267867	BB218582
ENSMUSG00000109904	76.5471	-1.84593	0.452627	-4.07826	4.53738e-05	0.000269121	NA
ENSMUSG00000107350	8.02246	4.83663	1.18638	4.07679	4.56609e-05	0.000270664	Gm19610
ENSMUSG00000060538	66.014	1.0595	0.259931	4.07606	4.58054e-05	0.000271399	Tmem219
ENSMUSG00000020333	91.3495	-1.34904	0.331245	-4.07265	4.64817e-05	0.000275039	Acsl6
ENSMUSG00000029915	41.6666	1.66105	0.407953	4.07167	4.6677e-05	0.000275869	Clec5a
ENSMUSG00000052889	39.1179	1.19303	0.293056	4.071	4.68111e-05	0.000276498	Prkcb
ENSMUSG00000038352	22.7695	1.82839	0.449218	4.07017	4.69787e-05	0.000277406	Arl5c
ENSMUSG00000043015	41.2296	1.25819	0.309393	4.06664	4.76967e-05	0.000281148	Nemp2
ENSMUSG00000086746	10.4316	2.90905	0.715549	4.06548	4.79341e-05	0.000282464	Gm15222
ENSMUSG00000041889	251.713	1.06651	0.262367	4.06496	4.80407e-05	0.000282925	Shisa4
ENSMUSG00000140097	8.56692	-2.88071	0.708856	-4.06389	4.82609e-05	0.000284055	NA
ENSMUSG00000072294	73.5678	-1.39247	0.34277	-4.06239	4.85719e-05	0.000285801	Klf12
ENSMUSG00000057967	139.519	1.21027	0.297988	4.06146	4.87672e-05	0.000286697	Fgf18
ENSMUSG00000045180	81.6039	1.11142	0.274096	4.05485	5.01663e-05	0.000294403	Shroom2
ENSMUSG00000044827	23.2677	2.29961	0.567569	4.05168	5.08518e-05	0.000298163	Tlr1
ENSMUSG00000032491	47.2561	1.19131	0.294143	4.05012	5.11919e-05	0.000299719	Nradd
ENSMUSG00000023905	2199.67	1.75942	0.434576	4.04859	5.15262e-05	0.000301323	Tnfrsf12a
ENSMUSG00000061474	50.087	-1.2343	0.305327	-4.04255	5.2874e-05	0.000308753	Mrps36
ENSMUSG00000034218	53.3082	-1.13234	0.280425	-4.03795	5.39196e-05	0.000314179	Atm
ENSMUSG00000038418	554.017	1.06712	0.264443	4.03534	5.4523e-05	0.000317271	Egr1
ENSMUSG00000030789	44.999	1.8731	0.464354	4.03377	5.489e-05	0.000319314	Itgax
ENSMUSG00000051242	29.6759	1.37919	0.342087	4.0317	5.53739e-05	0.000321941	Pcdhb9
ENSMUSG00000049124	70.6657	1.34184	0.333083	4.02853	5.61263e-05	0.000326031	NA
ENSMUSG00000086392	16.4955	-1.88355	0.468209	-4.02289	5.74895e-05	0.000333466	Mccc1os
ENSMUSG00000118024	24.0754	-1.86564	0.463939	-4.02131	5.78762e-05	0.000335416	NA
ENSMUSG00000029322	72.9964	2.7992	0.696218	4.02058	5.80554e-05	0.000336261	Plac8
ENSMUSG00000129245	14.5735	2.50528	0.623328	4.0192	5.83955e-05	0.000338035	NA
ENSMUSG00000047281	71.5919	1.23773	0.307968	4.01903	5.84376e-05	0.00033818	Sfn
ENSMUSG00000037872	13.0933	2.44639	0.608762	4.01864	5.85359e-05	0.000338553	Ackr1
ENSMUSG00000030905	15.1009	2.46334	0.612973	4.01867	5.85277e-05	0.000338553	Crym
ENSMUSG00000020534	104.465	-1.01224	0.251944	-4.01771	5.87664e-05	0.000339789	Shmt1
ENSMUSG00000100396	8.8338	3.3024	0.822603	4.01457	5.95532e-05	0.000343925	NA
ENSMUSG00000113722	11.1321	2.69368	0.671501	4.01143	6.03522e-05	0.000348184	NA
ENSMUSG00000054855	64.5394	1.34903	0.336299	4.01141	6.03577e-05	0.000348184	Rnd1
ENSMUSG00000118087	32.0505	1.60798	0.401113	4.00878	6.10323e-05	0.000351569	4833438C02Rik
ENSMUSG00000027219	326.081	-1.12315	0.28067	-4.00167	6.28971e-05	0.000361166	Slc28a2
ENSMUSG00000078932	13.1879	-2.09175	0.522786	-4.00117	6.30304e-05	0.000361803	Redic1
ENSMUSG00000028865	8.56529	4.32936	1.08239	3.99983	6.33884e-05	0.00036357	Cd164l2
ENSMUSG00000005057	45.5725	1.82072	0.455305	3.9989	6.36364e-05	0.000364783	Sh2b2
ENSMUSG00000040229	67.188	1.53656	0.384439	3.99689	6.41794e-05	0.00036758	Gpr34
ENSMUSG00000111058	9.14675	3.36058	0.841846	3.99191	6.55424e-05	0.000374635	Gm36033
ENSMUSG00000028167	42.1812	1.56304	0.391619	3.99122	6.57338e-05	0.000375514	Bdh2
ENSMUSG00000074207	112.915	1.10678	0.277446	3.98919	6.62984e-05	0.00037804	Adh1
ENSMUSG00000025176	19.0947	1.77575	0.445145	3.98916	6.63082e-05	0.00037804	Hoga1
ENSMUSG00000036330	10.7544	2.48699	0.623586	3.98821	6.65742e-05	0.00037934	Slc18a1
ENSMUSG00000121913	90.4317	1.18262	0.296668	3.98633	6.71018e-05	0.00038202	NA
ENSMUSG00000036867	769.963	1.00131	0.251233	3.98559	6.73136e-05	0.000383068	Smad6
ENSMUSG00000097819	9.53028	3.17191	0.796839	3.98062	6.87359e-05	0.000390434	NA
ENSMUSG00000108332	7.14976	-4.31893	1.08596	-3.97706	6.97723e-05	0.000395647	NA
ENSMUSG00000120307	6.33015	-4.73931	1.19288	-3.973	7.09726e-05	0.000402339	NA
ENSMUSG00000059854	13.7689	2.54532	0.64071	3.97265	7.10786e-05	0.000402826	Hydin
ENSMUSG00000116617	18.472	1.90605	0.480014	3.97082	7.16267e-05	0.000405358	NA
ENSMUSG00000048965	70.2484	1.09082	0.275114	3.96497	7.34047e-05	0.000414716	Mrgpre
ENSMUSG00000033220	119.612	1.26267	0.318482	3.96466	7.35012e-05	0.000415144	Rac2
ENSMUSG00000031101	54.3665	1.26237	0.318986	3.95743	7.57592e-05	0.000426933	Sash3
ENSMUSG00000143224	28.629	1.66333	0.420542	3.95521	7.64686e-05	0.000430445	NA
ENSMUSG00000025272	41.9906	1.22673	0.310246	3.95405	7.6838e-05	0.000432038	Tro
ENSMUSG00000037813	181.954	-1.15022	0.291	-3.95265	7.72893e-05	0.000434332	D630003M21Rik
ENSMUSG00000038473	25.231	-1.39942	0.35436	-3.94915	7.84295e-05	0.000440492	Nos1ap
ENSMUSG00000040247	28.9379	-1.48682	0.37651	-3.94896	7.84921e-05	0.000440719	Tbc1d10c
ENSMUSG00000117919	21.6011	-1.73732	0.440336	-3.94544	7.96545e-05	0.000446619	NA
ENSMUSG00000100320	3.52515	-5.39412	1.3674	-3.9448	7.98669e-05	0.000447684	NA
ENSMUSG00000031722	519.773	3.67095	0.930684	3.94435	8.00158e-05	0.000448393	Hp
ENSMUSG00000002204	29.6778	2.02197	0.512641	3.94423	8.00572e-05	0.0004485	Napsa
ENSMUSG00000079104	65.3891	-1.206	0.305961	-3.94169	8.091e-05	0.00045277	Prps1l3
ENSMUSG00000079022	25.4542	1.93773	0.49187	3.93951	8.16491e-05	0.00045665	Col22a1
ENSMUSG00000025909	5.20113	4.94996	1.25666	3.93897	8.18328e-05	0.00045755	Sntg1
ENSMUSG00000048814	116.425	-1.00651	0.255727	-3.93588	8.2892e-05	0.000462955	Lonrf2
ENSMUSG00000054423	9.45757	2.95289	0.750314	3.93554	8.3009e-05	0.000463478	Cadps
ENSMUSG00000032988	28.0485	-1.8119	0.460778	-3.93227	8.41475e-05	0.00046918	Slc16a8
ENSMUSG00000062012	67.9815	1.04663	0.266193	3.93185	8.42933e-05	0.000469863	Zfp13
ENSMUSG00000021493	1474.6	1.00628	0.255963	3.93136	8.44677e-05	0.000470703	Pdlim7
ENSMUSG00000010461	19.748	1.65904	0.422344	3.92817	8.55964e-05	0.000476595	Eya4
ENSMUSG00000068697	13.0278	2.22763	0.5679	3.92258	8.76059e-05	0.000487105	Myoz1
ENSMUSG00000043126	70.0833	-1.10303	0.281424	-3.91944	8.87535e-05	0.000492528	D830039M14Rik
ENSMUSG00000030554	250.412	1.13361	0.289351	3.91779	8.93653e-05	0.000495585	Synm
ENSMUSG00000036578	26.9068	1.82822	0.466721	3.91716	8.95971e-05	0.000496658	Fxyd7
ENSMUSG00000120396	20.3497	-1.89327	0.483592	-3.91502	9.03979e-05	0.000500819	NA
ENSMUSG00000023439	95.8435	-1.58055	0.404314	-3.90921	9.25974e-05	0.00051187	Gnb3
ENSMUSG00000044072	55.8056	-1.11618	0.285624	-3.90785	9.31219e-05	0.000514344	Eml6
ENSMUSG00000026278	236.56	1.04475	0.267448	3.90637	9.3692e-05	0.000517207	Bok
ENSMUSG00000097762	22.4321	-2.13371	0.546349	-3.9054	9.40677e-05	0.000519138	Gm40474
ENSMUSG00000046056	18.6466	1.90032	0.486698	3.90452	9.44121e-05	0.000520476	Sbsn
ENSMUSG00000069184	42.1962	-1.32989	0.340621	-3.9043	9.44997e-05	0.000520803	Zfp72
ENSMUSG00000044042	33.5804	1.31602	0.337434	3.90009	9.61577e-05	0.000529066	Fmn1
ENSMUSG00000026928	27.9534	1.58251	0.405771	3.9	9.61913e-05	0.000529105	Card9
ENSMUSG00000107875	3.23187	-5.27063	1.35227	-3.89762	9.71429e-05	0.000533899	Gm16630
ENSMUSG00000024376	44.566	-1.17565	0.301722	-3.89647	9.76046e-05	0.000535994	Epb41l4a
ENSMUSG00000095028	5.64963	5.07141	1.30256	3.89343	9.88371e-05	0.000542018	Sirpb1b
ENSMUSG00000050174	55.8022	-1.13335	0.29119	-3.89213	9.93698e-05	0.000544492	Nudt6
ENSMUSG00000134382	5.18983	4.94188	1.27091	3.88845	0.000100885	0.000552343	Gm30782
ENSMUSG00000028195	1146.65	1.45017	0.373178	3.88599	0.000101912	0.000557354	Ccn1
ENSMUSG00000019102	42.6432	1.36033	0.350726	3.8786	0.000105061	0.000573792	Aldh3a1
ENSMUSG00000049625	42.6215	1.25032	0.322783	3.87358	0.000107249	0.000584306	Tifab
ENSMUSG00000097245	23.9898	-1.42853	0.369171	-3.86956	0.000109034	0.000593382	Gm5421
ENSMUSG00000044835	48.3995	1.30177	0.336593	3.8675	0.000109957	0.000597916	Ankrd45
ENSMUSG00000047992	7.48391	4.73382	1.22514	3.86391	0.000111584	0.000606106	Dipk1c
ENSMUSG00000023031	13.5803	2.38326	0.616921	3.86315	0.000111933	0.000607836	Cela1
ENSMUSG00000039661	18.8686	2.32259	0.601497	3.86136	0.000112758	0.000611586	Dusp26
ENSMUSG00000080316	91.1245	1.12549	0.291478	3.86132	0.000112776	0.000611586	Spaca6
ENSMUSG00000118292	4.16381	-4.87337	1.26452	-3.85394	0.000116234	0.00062897	Gm10549
ENSMUSG00000124556	9.96843	-2.51298	0.652714	-3.85005	0.000118095	0.00063818	NA
ENSMUSG00000071573	27.641	-1.36835	0.355877	-3.845	0.000120554	0.000649885	Rnls
ENSMUSG00000027068	11.0196	2.99177	0.778483	3.84308	0.0001215	0.000654549	Dhrs9
ENSMUSG00000030774	55.24	1.05276	0.273936	3.84311	0.000121486	0.000654549	Pak1
ENSMUSG00000000301	45.0566	1.44396	0.375734	3.84305	0.000121517	0.000654549	Pemt
ENSMUSG00000054966	166.278	-1.20047	0.312504	-3.84147	0.0001223	0.000658409	Lmntd1
ENSMUSG00000014773	79.9867	-1.22939	0.320194	-3.83952	0.000123273	0.000663169	Dll1
ENSMUSG00000030117	7.14967	4.05935	1.05813	3.83634	0.00012488	0.000671218	Gdf3
ENSMUSG00000137273	38.6074	-1.35519	0.353316	-3.83563	0.000125244	0.000672995	Gm53355
ENSMUSG00000030268	43.9411	1.36932	0.357107	3.83449	0.000125826	0.00067541	Bcat1
ENSMUSG00000053930	26.8487	-1.68415	0.439676	-3.83043	0.000127917	0.000686436	Shisa6
ENSMUSG00000125915	20.2055	1.75898	0.459241	3.8302	0.000128039	0.000686906	NA
ENSMUSG00000023067	913.358	1.49998	0.391888	3.82757	0.000129417	0.000693368	Cdkn1a
ENSMUSG00000133044	6.26047	-3.68982	0.96436	-3.82619	0.000130142	0.000696824	NA
ENSMUSG00000071203	34.0522	1.71615	0.448534	3.82614	0.000130167	0.000696824	Naip5
ENSMUSG00000059772	73.8112	1.01954	0.266487	3.82584	0.000130327	0.000697493	Slx1b
ENSMUSG00000031662	72.3248	1.1455	0.299556	3.824	0.000131304	0.000702161	Snx20
ENSMUSG00000081564	4.97176	4.87984	1.27623	3.82364	0.000131495	0.000702812	Gm13717
ENSMUSG00000043664	14.0964	1.89887	0.497102	3.81989	0.000133513	0.000712257	Tmem221
ENSMUSG00000054477	67.0673	-1.04305	0.273103	-3.81924	0.000133863	0.000713748	Kcnn2
ENSMUSG00000143809	10.18	-3.15505	0.826978	-3.81516	0.000136096	0.000724301	NA
ENSMUSG00000025330	22.7249	2.26037	0.592596	3.81436	0.000136536	0.000726064	Padi4
ENSMUSG00000034786	80.0437	1.1823	0.310032	3.81348	0.000137024	0.000728463	Gpsm3
ENSMUSG00000030406	20.6757	1.92654	0.505844	3.80857	0.000139773	0.000741896	Gipr
ENSMUSG00000020865	40.4396	1.30432	0.342543	3.80776	0.000140234	0.000744144	Abcc3
ENSMUSG00000020926	248.51	-1.03324	0.271367	-3.80753	0.00014036	0.000744616	Adam11
ENSMUSG00000038155	81.0952	-1.43627	0.377286	-3.80684	0.000140751	0.000746295	Gstp2
ENSMUSG00000134930	22.6494	-1.53826	0.404499	-3.80289	0.000143017	0.000757303	NA
ENSMUSG00000009654	5.41643	5.00772	1.31694	3.80255	0.000143216	0.000758157	Oit3
ENSMUSG00000112907	12.7316	3.86082	1.01574	3.801	0.000144111	0.00076229	NA
ENSMUSG00000121147	6.15795	-3.63849	0.957416	-3.80033	0.000144505	0.000764174	NA
ENSMUSG00000087484	22.4079	1.70209	0.448133	3.79818	0.000145765	0.000770224	2900089D17Rik
ENSMUSG00000030413	22.5111	1.61218	0.424503	3.79781	0.000145982	0.000770965	Pglyrp1
ENSMUSG00000038020	19.9861	-1.81797	0.478781	-3.79708	0.00014641	0.000773019	Rapgefl1
ENSMUSG00000024675	18.1155	2.61772	0.689683	3.79554	0.000147322	0.000777427	Ms4a4c
ENSMUSG00000002668	54.9819	1.56523	0.412531	3.79421	0.000148114	0.000781191	Dennd1c
ENSMUSG00000078546	20.8782	1.72261	0.454197	3.79265	0.000149046	0.000785279	Zfp995
ENSMUSG00000044338	415.772	-2.59079	0.683181	-3.79224	0.000149295	0.000786252	Aplnr
ENSMUSG00000123421	26.0482	1.67814	0.442523	3.79222	0.000149309	0.000786252	NA
ENSMUSG00000120381	51.4334	-1.22274	0.322502	-3.7914	0.000149799	0.000788415	NA
ENSMUSG00000035226	39.9385	-1.43593	0.378822	-3.79051	0.000150341	0.000791058	Rims4
ENSMUSG00000001827	11.2396	2.44299	0.644641	3.78969	0.000150835	0.000793243	Folr1
ENSMUSG00000126401	16.2898	3.19997	0.844691	3.78833	0.000151662	0.000797139	NA
ENSMUSG00000025511	898.057	1.03234	0.273006	3.78137	0.000155967	0.000818082	Tspan4
ENSMUSG00000031297	6.54983	3.92317	1.0383	3.77844	0.000157811	0.000827321	Slc7a3
ENSMUSG00000120048	7.09724	4.03677	1.06865	3.77746	0.000158435	0.000829937	NA
ENSMUSG00000074206	23.6145	2.1128	0.559366	3.77714	0.000158641	0.000830799	Adh6b
ENSMUSG00000003283	53.9417	1.27642	0.338162	3.77459	0.000160273	0.000838029	Hck
ENSMUSG00000141590	12.3348	-2.32145	0.615481	-3.77176	0.000162098	0.000846555	NA
ENSMUSG00000039264	45.5803	1.58981	0.421778	3.76931	0.0001637	0.000854159	Gimap3
ENSMUSG00000105769	4.42662	5.47813	1.4537	3.7684	0.000164297	0.000856606	Gm43351
ENSMUSG00000089929	4.95584	4.87595	1.29447	3.76675	0.000165389	0.000861565	Bcl2a1b
ENSMUSG00000120850	14.7316	1.82432	0.484613	3.76448	0.000166893	0.000868332	NA
ENSMUSG00000125974	31.5769	-2.05457	0.546076	-3.76244	0.000168266	0.000874825	NA
ENSMUSG00000044534	72.9926	1.15857	0.307965	3.76201	0.000168551	0.000875361	Ackr2
ENSMUSG00000061533	153.156	-1.01364	0.269585	-3.76	0.00016991	0.000881962	Cep128
ENSMUSG00000040675	52.8377	1.87104	0.498035	3.75684	0.000172074	0.000892501	Mthfd1l
ENSMUSG00000005505	46.3568	-1.05302	0.280373	-3.75577	0.000172809	0.000896081	Kbtbd4
ENSMUSG00000038233	35.3351	1.29388	0.344556	3.75521	0.000173198	0.000897629	Gask1a
ENSMUSG00000001166	23.1948	1.82319	0.485625	3.75432	0.000173811	0.000900111	Oas1c
ENSMUSG00000072774	28.6724	1.37283	0.366058	3.75031	0.000176615	0.000913921	Zfp951
ENSMUSG00000050714	49.7487	-1.00093	0.266998	-3.74883	0.00017766	0.000917904	Zbtb26
ENSMUSG00000110618	13.631	2.52397	0.673533	3.74735	0.00017871	0.000922849	Gm39822
ENSMUSG00000117979	29.3028	1.53075	0.408548	3.74679	0.00017911	0.000924199	NA
ENSMUSG00000115637	20.3609	-1.83409	0.489553	-3.74646	0.00017935	0.000925199	NA
[truncated: 989 more rows]
