# Supplementary material
Source: Research Square preprint supplement (doi:10.21203/rs.3.rs-9548570/v1)
Supplement: Supplementary file 3 [file fbd6e658afa0a16156dd7d89.xlsx]

## Sheet: Sheet1
	baseMean	log2FoldChange	lfcSE	stat	pvalue	padj	symbol	Name					Secreted	Uniprot
ENSMUSG00000007888	538.409	5.89181	0.319454	18.4433	5.89732e-76	1.17946e-72	Crlf1	Crlf1 (secreted cytokine receptor-like)					YES	Secreted, heterodimeric neurotropic cytokine
ENSMUSG00000024529	1420.24	5.40312	0.401905	13.4438	3.34854e-41	9.70592e-39	Lox	Lox (lysyl oxidase, secreted ECM enzyme)					YES	Secreted, lysyl oxidase, secreted ECM enzyme
ENSMUSG00000027656	2979.82	5.2406	0.401465	13.0537	6.05393e-39	1.55229e-36	Ccn5	Ccn5 (WISP2, secreted matricellular protein)					YES	Secreted, WISP2, secreted matricellular protein, modulating bone turnover.
ENSMUSG00000054196	164.454	5.9047	0.462156	12.7764	2.22051e-37	5.04662e-35	Cthrc1	Cthrc1 (secreted glycoprotein)					YES	Secreted, negative regulator of collagen matrix deposition.
ENSMUSG00000050359	413.445	7.10745	0.581326	12.2263	2.25034e-34	4.09152e-32	Sprr1a	Sprr1a (small proline-rich protein)					NO	Not-secreted, cytoplasm, cross-linked envelope protein of keratinocytes
ENSMUSG00000021091	5591.09	5.87921	0.500386	11.7493	7.11714e-32	1.10343e-29	Serpina3n	Serpina3n (serpin, secreted protease inhibitor)					YES	Secreted, serine-type endopeptidase inhibitor activity, acute-phase response.
ENSMUSG00000030144	105.069	5.24049	0.463252	11.3124	1.13936e-29	1.45141e-27	Clec4d	Clec4d (C-type lectin, membrane-bound)					NO	Not-secreted, single-pass type II membrane protein
ENSMUSG00000079014	49.0202	5.295	0.58021	9.12602	7.10654e-20	3.67263e-18	Serpina3i	Serpina3i (serpin, secreted)					YES	Secreted, serine (or cysteine) peptidase inhibitor
ENSMUSG00000026358	30.1017	5.44161	0.727591	7.47894	7.49269e-14	1.87552e-12	Rgs1	Rgs1 (regulator of G-protein)					NO	Not secreted, cytoplasm, regulates G protein-coupled receptor signaling cascades,
ENSMUSG00000091572	24.7911	5.48793	0.819215	6.69901	2.0984e-11	3.78772e-10	Vmn2r3	Vmn2r3 (vomeronasal receptor, transmembrane)					NO	Not secreted, cell membrane Multi pass membrane protein
ENSMUSG00000047798	33.4487	6.34143	0.985884	6.43223	1.25749e-10	2.01198e-09	Cd300lf	Cd300lf (CD300-like, membrane receptor)					NO	Not secreted, cell membrane single-pass type I membrane protein
ENSMUSG00000040809	111.37	6.66849	1.08226	6.16163	7.19977e-10	1.03075e-08	Chil3	Chil3 (chitinase-like 3, secreted lectin)					YES	Secreted, lectin that binds saccharides with a free amino group
ENSMUSG00000052353	19.968	6.91495	1.15234	6.00079	1.96358e-09	2.63568e-08	Cemip	Cemip (cell migration-inducing protein, secreted)					YES	Secreted, mediates depolymerization of hyaluronic acid (HA) via the cell membrane-associated clathrin-coated pit endocytic pathway
ENSMUSG00000030827	17.0367	5.35257	0.928606	5.76409	8.21002e-09	1.00306e-07	Fgf21	Fgf21 (fibroblast growth factor 21, secreted hormone)					YES	Secreted, hormone, stimulates glucose uptake in differentiated adipocytes via the induction of glucose transporter SLC2A1/GLUT1 expression.
ENSMUSG00000061723	251.649	5.26798	0.958398	5.49665	3.87069e-08	4.18227e-07	Tnnt3	Tnnt3 (troponin T3, intracellular)					NO	Cytosol,Troponin T is the tropomyosin-binding subunit of troponin
ENSMUSG00000031898	7.31861	6.19867	1.18268	5.2412	1.59538e-07	1.54366e-06	Dpep3	Dpep3 (dipeptidase, secreted)					YES	Secreted, lipid-anchor, GPI-anchor
ENSMUSG00000079012	17.012	5.36234	1.0793	4.96835	6.75266e-07	5.8288e-06	Serpina3m	Serpina3m (serpin, secreted)					YES	Secreted, serine-type endopeptidase inhibitor activity.
ENSMUSG00000062082	14.0725	5.0675	1.03369	4.90234	9.46998e-07	7.8818e-06	Cd200r4	Cd200r4 (CD200 receptor 4)					NO	Not secreted, single-pass type I membrane protein
ENSMUSG00000079597	7.6907	6.27042	1.35105	4.64113	3.46515e-06	2.61619e-05	Cstdc4	Cstdc4 (cystatin D-like)					NO	Not secreted, intracellular thiol proteinase inhibitor
ENSMUSG00000033213	10.541	5.24272	1.16723	4.49158	7.06973e-06	5.0426e-05	AA467197	AA467197 / Gm13749 / 4930430E12Rik (predicted/lncRNA)					NO	LncRNA
ENSMUSG00000044689	10.8561	5.28505	1.19599	4.41898	9.91692e-06	6.83454e-05	Gm13749						NO	LncRNA
ENSMUSG00000039760	5.67217	5.82952	1.33181	4.37715	1.20243e-05	8.13554e-05	Il22ra2	Il22ra2 (IL-22 receptor antagonist, secreted)					YES	Secreted, IL22 antagonist in the regulation of inflammatory response
ENSMUSG00000085295	11.5826	5.3848	1.24113	4.33864	1.43365e-05	9.51646e-05	4930430E12Rik						NO	LncRNA
ENSMUSG00000050808	4.08466	5.35916	1.2855	4.16893	3.06028e-05	0.000189198	Muc15	Muc15 (mucin 15, secreted/membrane-associated)					YES	Secreted, secreted via proteolytic cleavage, single-pass type I membrane protein
ENSMUSG00000028327	3.97639	5.32011	1.28111	4.15274	3.28518e-05	0.000201421	Stra6l	STRA6-like protein					NO	Not secreted, cell-surface receptor for retinol-binding protein RBP4
ENSMUSG00000039714	4.71801	5.56449	1.34443	4.13892	3.48945e-05	0.000212966	Cplx3	Cplx3 (complexin 3, intracellular synaptic)					NO	Not secreted, synapse regulates SNARE protein complex-mediated synaptic vesicle fusion
ENSMUSG00000032514	4.61507	5.5321	1.33948	4.13003	3.62722e-05	0.000220567	Ttc21a	Ttc21a (intraflagellar transport, intracellular)					NO	Not secreted, intraflagellar transport (IFT)-associated protein required for spermatogenesis (
ENSMUSG00000047104	5.37648	5.75421	1.40161	4.10542	4.03579e-05	0.00024239	Pbp2	Pbp2 (phosphatidylethanolamine-binding, intracellular)					NO	Not secreted, serine protease inhibitor
ENSMUSG00000031936	11.3922	5.35423	1.30765	4.09456	4.22978e-05	0.000252902	Hephl1	Hephl1 (hephaestin-like 1, ferroxidase)					NO	Not secreted, single-pass type I membrane protein
ENSMUSG00000024903	6.01473	5.15955	1.26058	4.09298	4.25859e-05	0.000254244	Lao1	Lao1 (L-Amino Acid Oxidase 1)					YES	Secreted, L-amino acid oxidase 1
